# Supplementary material for: Genome-wide exonic small interference RNA-mediated gene silencing regulates sexual reproduction in the homothallic fungus Fusarium graminearum
Source: PLoS Genet. 2017 Feb 1;13(2):e1006595. doi: 10.1371/journal.pgen.1006595 (PMC5310905; doi:10.1371/journal.pgen.1006595)
Supplement: S2 Table — (XLS) [file pgen.1006595.s010.xls]

## Sheet: S2 Table
S2 Table. Total RNA-seq data of the wild-type and RNAi mutant strains.
Locus ID	MIPS annotation	Z-3639	Fgdicer1 Fgdicer2	Fgdicer1	Fgdicer2	Fgago1 Fgago2	Fgago1	Fgago2	Fgdicer1 Fgdicer2/Z-3639	Fgdicer1/Z-3639	Fgdicer2/Z-3639	Fgago1 Fgago2/Z-3639	Fgago1/Z-3639	Fgago2/Z-3639
FGSG_00003	conserved hypothetical protein	44	66.65	67.43	57.91	60.8	56.6	132.86	1.51477	1.5325	1.31614	1.38182	1.28636	3.01955
FGSG_00011	conserved hypothetical protein	419	187.84	342.69	329.17	184.68	351.72	208.96	0.448305	0.817876	0.785609	0.440764	0.839427	0.498711
FGSG_00012	related to benzoate 4-monooxygenase cytochrome P450	74	32.32	55.27	61.97	28.68	80.86	26.57	0.436757	0.746892	0.837432	0.387568	1.0927	0.359054
FGSG_00015	related to hexose transporter protein	290	452.43	898.73	384.04	486.36	547.13	847.92	1.5601	3.09907	1.32428	1.6771	1.88666	2.92386
FGSG_00016	conserved hypothetical protein	68	44.43	100.6	82.29	51.62	146.89	79.72	0.653382	1.47941	1.21015	0.759118	2.16015	1.17235
FGSG_00017	related to CPS1 - Gly-X carboxypeptidase YSCS precursor	310	119.17	308.42	225.54	130.77	258.74	242.78	0.384419	0.994903	0.727548	0.421839	0.834645	0.783161
FGSG_00018	conserved hypothetical protein	869	915.96	1013.7	710.16	910.79	735.79	967.5	1.05404	1.16651	0.817215	1.04809	0.846709	1.11335
FGSG_00019	conserved hypothetical protein	168	151.48	174.66	247.9	131.91	188.66	351.49	0.901667	1.03964	1.4756	0.785179	1.12298	2.0922
FGSG_00023	probable spherulin 1A precursor	723	1223.98	1380.71	968.22	1160.85	859.77	1704.29	1.69292	1.9097	1.33917	1.6056	1.18917	2.35725
FGSG_00024	conserved hypothetical protein	261	155.52	322.79	184.91	120.44	239.87	137.7	0.595862	1.23674	0.708467	0.461456	0.919042	0.527586
FGSG_00025	conserved hypothetical protein	439	100.99	301.79	240.78	139.94	332.86	248.82	0.230046	0.687449	0.548474	0.31877	0.758223	0.566788
FGSG_00030	hypothetical protein	74	117.15	70.75	64.01	105.53	55.25	112.33	1.58311	0.956081	0.865	1.42608	0.746622	1.51797
FGSG_00036	probable fatty acid synthase, alpha subunit	47	65.64	36.48	56.89	82.59	59.29	68.85	1.3966	0.77617	1.21043	1.75723	1.26149	1.46489
FGSG_00039	conserved hypothetical protein	23	50.49	67.43	43.69	42.44	37.73	76.1	2.19522	2.93174	1.89957	1.84522	1.64043	3.3087
FGSG_00045	conserved hypothetical protein	462	341.34	561.57	598.4	441.63	392.15	897.44	0.738831	1.21552	1.29524	0.955909	0.84881	1.94251
FGSG_00046	related to multidrug resistance protein	91	189.86	108.33	130.04	136.5	99.72	83.34	2.08637	1.19044	1.42901	1.5	1.09582	0.915824
FGSG_00052	related to Zn(II)Cys6 transcriptional activator	53	54.53	53.06	46.73	51.62	41.78	54.35	1.02887	1.00113	0.881698	0.973962	0.788302	1.02547
FGSG_00053	probable AAD14 - strong similarity to aryl-alcohol reductase	687	355.48	1019.23	1249.64	410.66	746.57	219.83	0.517438	1.4836	1.81898	0.597758	1.08671	0.319985
FGSG_00054	conserved hypothetical protein	87	38.38	103.91	104.64	45.88	75.47	32.61	0.441149	1.19437	1.20276	0.527356	0.867471	0.374828
FGSG_00055	conserved hypothetical protein	1242	244.39	480.87	528.3	236.3	954.1	208.96	0.196771	0.387174	0.425362	0.190258	0.768196	0.168245
FGSG_00058	related to nicotinamide mononucleotide permease	990	210.06	573.73	518.14	224.83	756	316.46	0.212182	0.579525	0.523374	0.227101	0.763636	0.319657
FGSG_00059	conserved hypothetical protein	13248	14817	10645.5	13667.8	13993.3	13307.6	11951.8	1.11843	0.803555	1.03169	1.05626	1.0045	0.902158
FGSG_00062	related to KP4 killer toxin	205	117.15	113.86	251.96	141.09	262.78	124.41	0.571463	0.555415	1.22907	0.688244	1.28185	0.606878
FGSG_00064	conserved hypothetical protein	1708	1568.35	1356.39	1687.52	1712.6	1575.35	847.92	0.918238	0.794139	0.988009	1.00269	0.922336	0.49644
FGSG_00066	conserved hypothetical protein	2281	2606.51	2001.97	1270.97	2583.24	1931.11	2204.35	1.1427	0.877672	0.557199	1.1325	0.846607	0.966396
FGSG_00067	related to hexose transporter protein	3615	10026.1	3064.31	1663.14	11263.2	3284.11	2280.44	2.77348	0.847665	0.460066	3.1157	0.908467	0.630827
FGSG_00068	probable alpha-galactosidase C precursor	1952	641.28	1935.65	1367.49	707.75	1731.67	1915.67	0.328525	0.991624	0.700558	0.362577	0.887126	0.981388
FGSG_00069	related to transcription activator amyR	1728	809.93	1276.8	1173.44	807.55	1598.26	969.91	0.468709	0.738889	0.679074	0.467332	0.924919	0.561291
FGSG_00070	probable alpha-glucoside transport protein	839	1106.83	853.41	686.79	980.76	791.04	736.8	1.31923	1.01718	0.818582	1.16896	0.942837	0.878188
FGSG_00071	cytochrome P450 monooxygenase	58	60.59	46.43	39.62	61.94	60.64	26.57	1.04466	0.800517	0.683103	1.06793	1.04552	0.458103
FGSG_00076	related to neutral amino acid permease	31	72.71	51.96	34.54	59.65	28.3	57.98	2.34548	1.67613	1.11419	1.92419	0.912903	1.87032
FGSG_00079	conserved hypothetical protein	174	445.36	177.98	197.1	470.31	183.27	243.99	2.55954	1.02287	1.13276	2.70293	1.05328	1.40224
FGSG_00080	related to arylamine N-acetyltransferase	1592	1081.59	1349.76	1570.68	979.61	1365.12	1379.38	0.679391	0.847839	0.986608	0.615333	0.857487	0.866445
FGSG_00082	related to triacylglycerol lipase V precursor	87	59.58	55.27	78.23	55.06	84.9	39.86	0.684828	0.635287	0.899195	0.632874	0.975862	0.458161
FGSG_00092	related to salicylate 1-monooxygenase	233	98.97	182.4	141.22	74.56	221.01	118.37	0.424764	0.782833	0.606094	0.32	0.948541	0.508026
FGSG_00093	hypothetical protein	1520	548.37	1243.63	1320.76	493.25	1976.93	919.18	0.36077	0.818178	0.868921	0.324507	1.30061	0.604724
FGSG_00097	conserved hypothetical protein	175	286.81	223.3	215.38	239.74	235.83	271.77	1.63891	1.276	1.23074	1.36994	1.3476	1.55297
FGSG_00102	related to C6 zink-finger protein PRO1A	213	117.15	182.4	158.49	125.03	231.79	171.52	0.55	0.856338	0.744085	0.586995	1.08822	0.805258
FGSG_00105	hypothetical protein	128	99.98	573.73	181.86	96.36	94.33	315.25	0.781094	4.48227	1.42078	0.752812	0.736953	2.46289
FGSG_00107	probable quinate transport protein	707	901.83	1024.75	858.49	925.7	715.58	1268.26	1.27557	1.44943	1.21427	1.30934	1.01214	1.79386
FGSG_00108	related to allantoate permease	65	224.19	91.75	38.61	191.56	56.6	107.5	3.44908	1.41154	0.594	2.94708	0.870769	1.65385
FGSG_00116	related to HNM1 - Choline permease	25659	6149.18	21343	28646.2	8279.67	26964.2	25319.2	0.23965	0.831792	1.11642	0.322681	1.05087	0.986757
FGSG_00117	conserved hypothetical protein	880	666.52	1399.5	1349.2	683.66	890.76	1403.54	0.757409	1.59034	1.53318	0.776886	1.01223	1.59493
FGSG_00118	related to neutral amino acid permease	319	332.25	327.21	282.44	362.48	296.47	111.12	1.04154	1.02574	0.885392	1.1363	0.929373	0.348339
FGSG_00126	related to capsule-associated protein	70	65.64	72.96	130.04	63.09	92.98	121.99	0.937714	1.04229	1.85771	0.901286	1.32829	1.74271
FGSG_00136	related to neutral amino acid permease	10018	2634.79	8867.94	11554.6	2387.09	5115.5	12052	0.263006	0.885201	1.15338	0.23828	0.510631	1.20304
FGSG_00137	related to dihydrodipicolinate synthase	711	1723.87	791.5	829.03	1677.04	603.73	1100.36	2.42457	1.11322	1.16601	2.35871	0.849128	1.54762
FGSG_00138	conserved hypothetical protein	3533	7206.53	5028.7	4406.24	7102.76	4429.57	7075.66	2.03978	1.42335	1.24717	2.0104	1.25377	2.00273
FGSG_00139	probable aldehyde dehydrogenase	3500	5845.2	5443.25	4798.41	6080.7	3286.8	7061.16	1.67006	1.55521	1.37097	1.73734	0.939086	2.01747
FGSG_00140	related to ankyrin 3	9767	13611.2	14617.4	13246.2	13704.2	10098.9	19964.8	1.39359	1.49661	1.35622	1.40312	1.03398	2.0441
FGSG_00144	related to ARG81 - transcription factor involved in arginine metabolism	71	90.89	57.48	67.05	91.77	63.34	60.39	1.28014	0.809577	0.944366	1.29254	0.892113	0.850563
FGSG_00145	probable L-lactate dehydrogenase (cytochrome)	42	151.48	46.43	81.28	128.47	53.9	51.94	3.60667	1.10548	1.93524	3.05881	1.28333	1.23667
FGSG_00147	related to transcription factor	656	397.89	481.98	470.39	416.39	525.56	485.56	0.60654	0.734726	0.717058	0.634741	0.801159	0.740183
FGSG_00148	related to allantoate permease	180	230.25	143.71	159.51	188.12	130.72	129.24	1.27917	0.798389	0.886167	1.04511	0.726222	0.718
FGSG_00150	related to endo-polygalacturonase 6	2368	1354.25	2078.25	1517.85	1469.42	1777.49	649.83	0.571896	0.877639	0.640984	0.620532	0.750629	0.274421
FGSG_00151	putative protein [EST hit]	11312	9378.79	8751.86	11556.6	9289.1	10926.4	4772.26	0.829101	0.773679	1.02162	0.821172	0.965908	0.421876
FGSG_00152	related to tetracycline resistance protein (probable transport protein)	1919	1928.88	1759.88	1686.5	1935.13	1776.14	1658.39	1.00515	0.917082	0.878843	1.00841	0.925555	0.864195
FGSG_00154	hypothetical protein	433	570.58	401.28	692.89	510.45	580.82	251.24	1.31774	0.926744	1.60021	1.17887	1.34139	0.580231
FGSG_00156	conserved hypothetical protein	1459	4052.66	2595.6	2468.8	4033.15	1945.94	5715.6	2.7777	1.77903	1.69212	2.76432	1.33375	3.91748
FGSG_00160	putative protein [EST hit]	6829	2485.32	3722.06	3566.04	2740.39	5259.69	1457.89	0.363936	0.545037	0.522191	0.401287	0.770199	0.213485
FGSG_00161	related to high affinity methionine permease	2098	1745.08	2737.1	1795.21	2037.22	2635.91	2253.87	0.831783	1.30462	0.855677	0.97103	1.25639	1.07429
FGSG_00162	conserved hypothetical protein	5830	6722.79	10024.2	6320.32	7948.16	8576.14	6765.23	1.15314	1.71942	1.0841	1.36332	1.47104	1.16042
FGSG_00164	hypothetical protein	221	880.62	422.28	237.74	1111.53	890.76	458.99	3.98471	1.91077	1.07575	5.02955	4.03059	2.07688
FGSG_00165	conserved hypothetical protein	1038	1063.41	847.88	1137.88	1031.23	1043.04	646.21	1.02448	0.81684	1.09622	0.993478	1.00486	0.622553
FGSG_00166	probable beta-glucosidase	7385	10111	8857.99	7453.12	10315.7	7139.59	10704.1	1.36912	1.19946	1.00922	1.39685	0.966769	1.44943
FGSG_00168	probable ribosomal protein S14 precursor, mitochondrial	2072	2367.17	2208.69	2090.86	2406.59	2282.84	1994.18	1.14246	1.06597	1.0091	1.16148	1.10176	0.962442
FGSG_00169	conserved hypothetical protein	2849	3264.95	3152.75	3069.23	3355.23	3687.04	3814.43	1.146	1.10662	1.0773	1.17769	1.29415	1.33887
FGSG_00170	probable rho3 protein	5643	6148.17	5381.34	6094.78	6119.7	6085.77	7463.38	1.08952	0.953631	1.08006	1.08448	1.07846	1.32259
FGSG_00171	conserved hypothetical protein	1595	1215.9	1103.24	1817.56	1102.35	1681.81	1947.07	0.76232	0.691687	1.13954	0.691129	1.05443	1.22073
FGSG_00172	related to glutathione transferase omega 1	9345	24787.6	22362.2	13744	25979.2	12981.5	25347	2.6525	2.39296	1.47073	2.78001	1.38913	2.71236
FGSG_00173	related to putative glycosidases	448	664.5	642.27	620.75	721.52	499.96	1061.71	1.48326	1.43364	1.3856	1.61054	1.11598	2.36989
FGSG_00174	conserved hypothetical protein	268	179.76	288.52	272.28	192.71	268.17	154.61	0.670746	1.07657	1.01597	0.719067	1.00063	0.576903
FGSG_00175	probable methylcitrate synthase	3914	3871.89	4734.65	3937.88	3706.23	3699.17	3979.91	0.989241	1.20967	1.0061	0.946916	0.945112	1.01684
FGSG_00176	probable isocitrate lyase	2064	2003.61	2826.64	2259.51	1931.69	2047.01	2648.84	0.970741	1.3695	1.09472	0.935896	0.991768	1.28335
FGSG_00177	related to short-chain alcohol dehydrogenase	6619	9137.42	7550.24	5637.59	8623.79	7399.68	7481.5	1.38048	1.14069	0.851728	1.30288	1.11795	1.13031
FGSG_00179	conserved hypothetical protein	2956	3029.65	2617.71	3264.3	3099.43	2898.69	2331.17	1.02492	0.885558	1.1043	1.04852	0.980612	0.788623
FGSG_00181	hypothetical protein	51	96.95	48.64	67.05	79.15	66.03	82.13	1.90098	0.953725	1.31471	1.55196	1.29471	1.61039
FGSG_00182	probable COP9 complex subunit 2	5632	7914.46	6589.6	5096.08	7917.19	5572.33	9638.74	1.40527	1.17003	0.904844	1.40575	0.989405	1.71142
FGSG_00183	conserved hypothetical protein	1138	1116.93	1231.47	1344.12	1238.85	1296.39	1312.95	0.981485	1.08214	1.18112	1.08862	1.13918	1.15373
FGSG_00184	conserved hypothetical protein	78	89.88	71.85	90.42	87.18	61.99	89.38	1.15231	0.921154	1.15923	1.11769	0.794744	1.1459
FGSG_00185	conserved hypothetical protein	29009	20976.3	19079	29937.5	20660.2	30477.4	12590.8	0.723096	0.657692	1.03201	0.712199	1.05062	0.434029
FGSG_00186	probable serine O-acetyltransferase	2379	1706.7	2320.34	2236.14	1779.13	2308.44	1889.1	0.717402	0.975343	0.93995	0.747848	0.97034	0.794073
FGSG_00188	related to pre-mRNA splicing factor	1568	1943.02	1808.52	1641.8	1994.78	1804.44	1785.22	1.23917	1.15339	1.04707	1.27218	1.15079	1.13853
FGSG_00189	related to oligosaccharyltransferase 48K subunit	7730	8981.9	7578.98	7968.22	8514.82	7611.25	6177.01	1.16195	0.980463	1.03082	1.10153	0.984638	0.799096
FGSG_00190	probable NADH2 dehydrogenase (ubiquinone) 9.5K protein, ubiquinone-binding	1367	1458.27	1532.16	1343.11	1462.53	1386.68	1445.81	1.06677	1.12082	0.982524	1.06988	1.0144	1.05765
FGSG_00192	probable subtilisin-like serine protease	69980	66899.7	74728.6	66848.5	68031.4	72244.9	83097.3	0.955983	1.06786	0.955252	0.972155	1.03237	1.18744
FGSG_00193	conserved hypothetical protein	7481	6634.93	6062.3	7551.67	6446.62	7485.93	4129.68	0.886904	0.81036	1.00945	0.861732	1.00066	0.552022
FGSG_00194	related to acetylhydrolase	6443	7939.7	7130.17	8111.47	7899.98	8700.12	9048.09	1.2323	1.10665	1.25896	1.22613	1.35032	1.40433
FGSG_00195	related to monocarboxylate transporter 2	519	827.09	538.36	587.23	914.23	707.49	527.84	1.59362	1.0373	1.13146	1.76152	1.36318	1.01703
FGSG_00196	conserved hypothetical protein	1057	1036.14	1196.1	989.55	1056.47	1141.42	1112.44	0.980265	1.1316	0.936187	0.999499	1.07987	1.05245
FGSG_00197	related to monocarboxylate transporter 4	40	65.64	49.75	40.64	76.85	49.86	32.61	1.641	1.24375	1.016	1.92125	1.2465	0.81525
FGSG_00198	conserved hypothetical protein	1454	3789.08	2267.28	1508.71	3395.37	1536.27	2805.86	2.60597	1.55934	1.03763	2.33519	1.05658	1.92975
FGSG_00199	conserved hypothetical protein	4474	5359.45	8720.91	5432.37	5743.46	6632.9	10799.5	1.19791	1.94924	1.21421	1.28374	1.48254	2.41383
FGSG_00200	related to alcohol oxidase	1448	2690.33	1773.15	1883.6	2605.03	1210.15	2255.08	1.85796	1.22455	1.30083	1.79905	0.835739	1.55738
FGSG_00201	related to integral membrane protein PTH11	387	387.8	298.47	396.23	384.27	363.85	250.03	1.00207	0.77124	1.02385	0.992946	0.940181	0.646072
FGSG_00207	conserved hypothetical protein	825	545.34	792.61	858.49	613.69	1348.95	975.95	0.661018	0.960739	1.04059	0.743867	1.63509	1.18297
FGSG_00209	conserved hypothetical protein	207	223.18	201.19	212.34	227.12	200.79	327.33	1.07816	0.971932	1.0258	1.0972	0.97	1.5813
FGSG_00213	conserved hypothetical protein	83	72.71	58.59	101.6	71.12	134.76	59.19	0.876024	0.705904	1.2241	0.856867	1.62361	0.713133
FGSG_00214	hypothetical protein	5626	4590.93	3647.99	6580.41	4578.02	6065.56	3083.67	0.81602	0.648416	1.16964	0.813726	1.07813	0.548111
FGSG_00216	conserved hypothetical protein	926	1108.85	694.22	1134.83	1004.85	1320.65	1931.37	1.19746	0.749698	1.22552	1.08515	1.42619	2.08571
FGSG_00217	conserved hypothetical protein	1863	1459.28	1518.89	1994.34	1390.27	1812.52	1498.96	0.783296	0.815293	1.0705	0.746253	0.972904	0.804595
FGSG_00220	related to sodium-dependent serotonin transporter	1056	489.79	2132.42	1504.65	498.98	1057.87	2663.34	0.463816	2.01934	1.42486	0.472519	1.00177	2.5221
FGSG_00222	conserved hypothetical protein	46	66.65	64.12	72.13	68.83	48.51	93.01	1.44891	1.39391	1.56804	1.4963	1.05457	2.02196
FGSG_00224	conserved hypothetical protein	1850	1552.19	2939.4	3202.32	1893.84	1691.24	3482.27	0.839022	1.58886	1.73098	1.0237	0.914184	1.88231
FGSG_00226	related to multidrug resistant protein	93	152.49	44.22	101.6	175.5	70.08	85.76	1.63968	0.475484	1.09247	1.8871	0.753548	0.922151
FGSG_00227	related to cutinase transcription factor 1 beta	343	352.45	246.52	333.24	357.89	293.78	216.21	1.02755	0.718717	0.971545	1.04341	0.856501	0.63035
FGSG_00229	conserved hypothetical protein	124	163.6	263.1	158.49	154.86	130.72	397.39	1.31935	2.12177	1.27815	1.24887	1.05419	3.20476
FGSG_00231	related to alcohol dehydrogenase, class C	1560	560.49	741.76	867.63	591.9	1188.58	501.26	0.359288	0.475487	0.556173	0.379423	0.76191	0.321321
FGSG_00232	hypothetical protein	170	49.48	106.12	114.8	63.09	115.89	68.85	0.291059	0.624235	0.675294	0.371118	0.681706	0.405
FGSG_00234	related to zinc-binding dehydrogenase	51	43.42	33.16	45.72	44.74	36.39	26.57	0.851373	0.650196	0.896471	0.877255	0.713529	0.52098
FGSG_00235	conserved hypothetical protein	158	106.04	130.44	143.25	95.21	150.93	62.81	0.671139	0.82557	0.906646	0.602595	0.955253	0.397532
FGSG_00236	related to alcohol dehydrogenase	41	38.38	43.11	32.51	33.27	52.56	25.37	0.936098	1.05146	0.792927	0.811463	1.28195	0.61878
FGSG_00237	related to trichothecene 3-O-acetyltransferase	112	134.31	84.01	99.56	177.8	84.9	103.88	1.1992	0.750089	0.888929	1.5875	0.758036	0.9275
FGSG_00243	conserved hypothetical protein	7966	8778.92	7866.4	8159.22	8915.15	8433.29	8017.79	1.10205	0.987497	1.02426	1.11915	1.05866	1.0065
FGSG_00245	hypothetical protein	4821	3427.54	3230.13	5335.85	3627.09	4456.52	1963.98	0.71096	0.670012	1.10679	0.752352	0.924397	0.40738
FGSG_00246	conserved hypothetical protein	111	170.67	137.08	175.76	174.36	126.67	161.85	1.53757	1.23495	1.58342	1.57081	1.14117	1.45811
FGSG_00247	conserved hypothetical protein	572	1141.17	881.05	633.96	1137.91	654.93	1240.47	1.99505	1.5403	1.10832	1.98935	1.14498	2.16865
FGSG_00249	conserved hypothetical protein	2061	2093.49	2256.23	2193.47	2170.29	2381.21	2090.81	1.01576	1.09473	1.06427	1.05303	1.15537	1.01446
FGSG_00251	probable galactose oxidase precursor	433	257.52	821.35	1004.79	411.8	389.46	1199.41	0.594734	1.89688	2.32053	0.951039	0.899446	2.77
FGSG_00252	conserved hypothetical protein	721	871.53	525.09	898.11	871.79	703.45	509.72	1.20878	0.72828	1.24564	1.20914	0.975659	0.706963
FGSG_00255	hypothetical protein	39	312.05	69.64	64.01	310.86	51.21	190.84	8.00128	1.78564	1.64128	7.97077	1.31308	4.89333
FGSG_00256	conserved hypothetical protein	7895	6766.22	5559.32	9055.3	6828.6	7500.75	3762.49	0.857026	0.704157	1.14697	0.864927	0.950063	0.476566
FGSG_00257	conserved hypothetical protein	2186	2288.4	2420.94	2272.72	2259.76	2189.85	2307.02	1.04684	1.10747	1.03967	1.03374	1.00176	1.05536
FGSG_00258	hypothetical protein	60	68.67	70.75	82.29	53.91	67.38	62.81	1.1445	1.17917	1.3715	0.8985	1.123	1.04683
FGSG_00259	conserved hypothetical protein	2938	2444.93	2593.39	2941.22	2461.65	2778.75	2557.04	0.832175	0.882706	1.0011	0.837866	0.945796	0.870334
FGSG_00260	conserved hypothetical protein	5194	4258.68	12177.7	7188.97	4052.65	4887.75	21008.3	0.819923	2.34456	1.38409	0.780256	0.941038	4.04473
FGSG_00261	conserved hypothetical protein	8891	6890.43	8597.1	8011.9	6568.21	7988.58	8272.65	0.774989	0.966944	0.901125	0.738748	0.898502	0.930452
FGSG_00262	conserved hypothetical protein	169	208.04	148.13	267.2	180.09	156.32	254.86	1.23101	0.876509	1.58107	1.06562	0.92497	1.50805
FGSG_00263	related to apopolysialoglycoprotein	5531	4293.01	4760.08	5932.22	4457.58	5522.47	3533	0.776172	0.860618	1.07254	0.805927	0.998458	0.638763
FGSG_00264	conserved hypothetical protein	1161	1400.71	1277.9	1299.42	1414.36	1204.76	1047.22	1.20647	1.10069	1.11922	1.21823	1.03769	0.901998
FGSG_00265	related to WD-repeat protein CRB3	546	606.94	551.62	590.28	620.57	478.4	578.57	1.11161	1.01029	1.0811	1.13658	0.87619	1.05965
FGSG_00266	conserved hypothetical protein	1214	1973.31	1838.37	1561.54	1998.22	1241.14	3067.97	1.62546	1.51431	1.28628	1.64598	1.02236	2.52716
FGSG_00267	conserved hypothetical protein	122	173.7	192.35	145.28	156	117.24	265.73	1.42377	1.57664	1.19082	1.27869	0.960984	2.17811
FGSG_00268	related to protein BTN1	264	209.05	294.05	293.61	230.56	281.65	467.44	0.791856	1.11383	1.11216	0.873333	1.06686	1.77061
FGSG_00269	related to nicotinate phosphoribosyltransferase	4839	7250.96	5460.93	5419.16	7282.85	5666.67	5267.49	1.49844	1.12852	1.11989	1.50503	1.17104	1.08855
FGSG_00270	related to UTP4 - U3 snoRNP protein	3314	3375.03	3434.64	3437.01	3515.82	3565.75	3316.79	1.01842	1.0364	1.03712	1.0609	1.07597	1.00084
FGSG_00271	related to PNG1 - protein with de-N-glycosylation function (N-glycanase)	4891	4545.48	6869.28	5348.04	4822.35	5099.32	8012.96	0.929356	1.40447	1.09345	0.985964	1.04259	1.63831
FGSG_00272	conserved hypothetical protein	722	803.87	650.01	738.61	797.22	816.65	606.35	1.11339	0.900291	1.02301	1.10418	1.13109	0.83982
FGSG_00274	hypothetical protein	186	194.91	150.34	192.02	142.24	171.15	131.66	1.0479	0.80828	1.03237	0.764731	0.920161	0.707849
FGSG_00275	conserved hypothetical protein	4388	4532.36	3730.9	4609.44	4580.31	4568.37	2522.02	1.0329	0.850251	1.05046	1.04383	1.04111	0.574754
FGSG_00276	related to mannose-P-dolichol utilization defect 1 protein	3430	3564.89	3192.55	3585.34	3687.88	3553.63	2543.76	1.03933	0.930773	1.04529	1.07518	1.03604	0.741621
FGSG_00278	probable biotin synthase	985	978.58	1326.54	1041.36	1040.41	929.85	1248.93	0.993482	1.34674	1.05722	1.05625	0.94401	1.26795
FGSG_00279	conserved hypothetical protein	3727	4888.85	4135.5	3987.67	4647.99	4098.06	4786.76	1.31174	1.10961	1.06994	1.24711	1.09956	1.28435
FGSG_00280	probable histone acetyltransferase	2546	2854.94	2318.13	2509.44	2936.54	2385.26	2435.05	1.12134	0.910499	0.98564	1.15339	0.936866	0.956422
FGSG_00281	conserved hypothetical protein	3733	4025.39	3550.71	3467.49	4244.22	3276.02	3291.42	1.07833	0.951168	0.928875	1.13695	0.877584	0.881709
FGSG_00283	probable protein FR, involved in hyphal branching	3070	2776.17	2962.61	3131.21	2889.51	3094.09	2715.27	0.90429	0.96502	1.01994	0.941208	1.00785	0.884453
FGSG_00284	conserved hypothetical protein	1505	1580.47	1751.04	1471.12	1678.19	1476.97	2456.79	1.05015	1.16348	0.977488	1.11508	0.981375	1.63242
FGSG_00285	conserved hypothetical protein	14120	9811.02	11031.3	13437.2	10048.5	12641.9	14035.4	0.694831	0.781254	0.95164	0.711648	0.895315	0.994006
FGSG_00286	probable translation initiation factor eIF-4E	16640	16326.8	15270.7	15824.7	16406.8	16651	12836	0.981177	0.917712	0.951002	0.985984	1.00066	0.771391
FGSG_00287	related to malonyl CoA synthetase	987	1189.64	1008.17	983.45	1202.15	1025.52	1018.23	1.20531	1.02145	0.996403	1.21798	1.03903	1.03164
FGSG_00288	conserved hypothetical protein	643	886.68	1021.44	819.88	914.23	765.44	879.32	1.37897	1.58855	1.27509	1.42182	1.19042	1.36753
FGSG_00291	related to VPS28 protein, involved in vacuolar traffic	967	1229.03	967.27	983.45	1233.12	892.11	1105.19	1.27097	1.00028	1.01701	1.2752	0.922554	1.14291
FGSG_00292	related to excision repair protein RAD4	1993	2340.91	2326.98	2221.92	2558	1991.76	2211.6	1.17457	1.16758	1.11486	1.28349	0.999378	1.10968
FGSG_00293	related to rho coiled-coil associated kinase alpha	20004	16886.3	16450.2	20489	16536.4	19296.3	10836.9	0.844144	0.822347	1.02424	0.826654	0.964623	0.541739
FGSG_00294	conserved hypothetical protein	1927	2584.29	4090.17	2411.9	2765.62	1889.34	4768.64	1.34109	2.12256	1.25163	1.43519	0.980457	2.47464
FGSG_00295	conserved hypothetical protein	154	333.26	163.61	193.03	392.3	221.01	218.62	2.16403	1.0624	1.25344	2.5474	1.43513	1.41961
FGSG_00296	probable ILV1 - anabolic serine and threonine dehydratase precursor	1634	1605.71	1968.81	1369.52	1874.34	1607.69	1663.23	0.982687	1.2049	0.83814	1.14709	0.983898	1.01789
FGSG_00297	related to p33ING1b (ING1) protein	4826	4410.16	4477.08	4821.77	4778.76	4786.68	3838.59	0.913833	0.9277	0.999123	0.990211	0.991852	0.795398
FGSG_00298	probable cis-prenyltransferase	3491	2699.42	2885.23	3762.12	2741.54	3568.45	2432.63	0.773251	0.826477	1.07766	0.785317	1.02219	0.696829
FGSG_00299	conserved hypothetical protein	45137	37877.7	38737.2	47638.6	37336.5	42954.8	31054.1	0.839172	0.858215	1.05542	0.827182	0.951654	0.687997
FGSG_00300	probable oligomycin sensitivity conferring protein (ATP5)	10601	10856.2	10387.9	9809.15	10718.4	9563.93	9649.61	1.02408	0.979901	0.925304	1.01107	0.902172	0.910255
FGSG_00301	probable MOB1 protein	7310	7428.7	5905.33	8176.49	7396.41	7636.86	4529.48	1.01624	0.807843	1.11853	1.01182	1.04471	0.619628
FGSG_00302	related to lariat-debranching enzyme	3701	3531.56	3163.8	3621.92	3559.41	3573.84	2192.27	0.954218	0.85485	0.978633	0.961743	0.965642	0.592345
FGSG_00303	related to Elongin C transcription elongation factor	1345	1672.37	1483.52	1510.74	1709.16	1506.62	1813	1.2434	1.10299	1.12323	1.27075	1.12016	1.34796
FGSG_00304	probable RHO1 protein	6471	5248.36	4891.63	6859.8	5134.36	6386.28	3391.68	0.811059	0.755931	1.06008	0.793442	0.986908	0.524135
FGSG_00305	probable heat shock protein MGE1 precursor	2521	2317.68	2097.04	2698.4	2501.79	2189.85	2032.83	0.919349	0.831829	1.07037	0.99238	0.868643	0.806359
FGSG_00306	probable 26s proteasome p44.5 protein	6506	6711.68	6967.66	6106.97	6631.3	6275.78	5894.37	1.03161	1.07096	0.938667	1.01926	0.964614	0.90599
FGSG_00307	conserved hypothetical protein	3523	3277.07	3051.05	3758.06	3348.34	3486.25	3181.51	0.930193	0.866037	1.06672	0.950423	0.989569	0.903068
FGSG_00308	related to peroxisomal membrane protein PMP47B	2984	2206.6	3484.39	2794.92	2290.73	3056.36	3072.8	0.739477	1.16769	0.936635	0.767671	1.02425	1.02976
FGSG_00309	conserved hypothetical protein	2503	2166.2	2185.48	2590.71	2239.11	2406.82	1777.97	0.865441	0.873144	1.03504	0.894571	0.961574	0.710336
FGSG_00310	related to atp synthase epsilon chain (mitochondrial)	5311	4951.46	5471.99	5037.16	4801.7	5397.14	4862.85	0.932303	1.03031	0.948439	0.904105	1.01622	0.915619
FGSG_00312	conserved hypothetical protein	601	602.9	604.68	629.9	638.93	673.8	299.55	1.00316	1.00612	1.04809	1.06311	1.12113	0.498419
FGSG_00313	related to UPC2 - regulatory protein involved in control of sterol uptake	2269	1391.62	2123.57	2078.67	1457.95	2489.02	2168.11	0.613319	0.935906	0.916117	0.642552	1.09697	0.955535
FGSG_00314	conserved hypothetical protein	16018	28566.6	28994.9	19554.3	27562.2	13865.5	27663.7	1.7834	1.81014	1.22077	1.7207	0.865618	1.72704
FGSG_00316	conserved hypothetical protein	10412	10883.5	11319.8	10729.6	11189.8	10090.8	13425.4	1.04529	1.08719	1.0305	1.0747	0.969155	1.28942
FGSG_00317	probable Alp11 homologue of tubulin-folding cofactor B	3793	4293.01	4526.83	4172.57	4215.54	3859.53	4705.83	1.13182	1.19347	1.10007	1.1114	1.01754	1.24066
FGSG_00318	related to DRPLA protein	714	703.89	700.86	724.38	679.07	793.74	605.14	0.98584	0.981597	1.01454	0.951078	1.11168	0.847535
FGSG_00319	conserved hypothetical protein	669	874.56	789.29	715.24	851.14	664.37	809.27	1.30726	1.17981	1.06912	1.27226	0.993079	1.20967
FGSG_00320	related to dimeric dihydrodiol dehydrogenase	3286	2561.06	3147.22	2669.96	2504.09	3104.87	2344.46	0.779385	0.957766	0.812526	0.762048	0.944878	0.713469
FGSG_00321	related to D-xylose reductase II,III protein	1114	940.2	1046.86	1183.6	946.35	1021.48	907.1	0.843986	0.939731	1.06248	0.849506	0.916948	0.814273
FGSG_00322	conserved hypothetical protein	8085	6025.97	6114.26	8440.64	6241.3	7923.9	3626	0.745327	0.756247	1.04399	0.77196	0.980074	0.448485
FGSG_00323	probable deoxyhypusine synthase	2742	2583.28	2464.05	2905.66	2597	2400.08	2026.79	0.942115	0.898632	1.05969	0.947119	0.875303	0.739165
FGSG_00324	conserved hypothetical protein	10779	8594.11	9705.87	12049.4	8776.36	10825.3	11652.2	0.797301	0.900443	1.11785	0.814209	1.00429	1.08101
FGSG_00325	conserved hypothetical protein	580	681.67	484.19	593.32	618.28	691.32	431.21	1.17529	0.83481	1.02297	1.066	1.19193	0.743466
FGSG_00326	conserved hypothetical protein	386	614.01	310.63	540.49	653.84	417.76	467.44	1.5907	0.804741	1.40023	1.69389	1.08228	1.21098
FGSG_00327	related to replication factor C protein	11648	8800.12	8916.58	10441.1	9049.36	11233.6	6382.34	0.755505	0.765503	0.896384	0.776902	0.964424	0.547934
FGSG_00328	related to ribosomal protein L16 precursor, mitochondrial	2594	2065.21	2479.53	2378.38	2151.93	2480.93	2152.41	0.796149	0.955871	0.916877	0.82958	0.956411	0.829765
FGSG_00329	probable replication factor C 38K chain	1685	1766.29	1537.68	1568.65	1699.98	1491.8	1103.99	1.04824	0.91257	0.93095	1.00889	0.885341	0.655187
FGSG_00330	probable acetyl-CoA synthetase	2478	2222.75	2470.69	2383.46	2683.03	2705.98	2474.91	0.896994	0.99705	0.961848	1.08274	1.092	0.998753
FGSG_00331	conserved hypothetical protein	4249	4562.65	3834.81	4759.8	4533.28	4137.14	3578.89	1.07382	0.902521	1.12022	1.06691	0.973674	0.84229
FGSG_00332	related to nuclear receptor co-repressor/HDAC3 complex subunit TBLR1	5051	3856.74	4687.12	4908.13	4160.48	5273.17	5068.19	0.76356	0.927959	0.971715	0.823694	1.04399	1.0034
FGSG_00333	related to human PL6 protein	2251	2258.1	2292.71	2491.15	2333.17	2319.22	2340.84	1.00315	1.01853	1.10669	1.0365	1.03031	1.03991
FGSG_00334	related to ferric reductase	984	1172.47	970.59	939.77	1215.91	1005.31	851.54	1.19153	0.986372	0.955051	1.23568	1.02166	0.865386
FGSG_00335	related to RNA-binding protein	4053	3101.35	3492.12	4016.11	3246.25	3811.02	3252.77	0.765199	0.861614	0.990898	0.80095	0.940296	0.802559
FGSG_00336	conserved hypothetical protein	224	433.24	304	249.93	398.04	227.74	386.52	1.93411	1.35714	1.11576	1.77696	1.0167	1.72554
FGSG_00337	probable calmodulin-dependent protein kinase	7180	7373.16	6762.05	7238.76	7467.53	7985.89	5663.66	1.0269	0.94179	1.00818	1.04005	1.11224	0.788811
FGSG_00338	probable aureobasidin-resistance protein	14870	11973.2	11671.4	14710.2	12364.4	13724	8759.41	0.80519	0.784893	0.989252	0.831502	0.922931	0.589066
FGSG_00339	related to SRP40 - suppressor of mutant AC40 of RNA polymerase I and III	2949	2935.73	2611.08	2954.43	3121.22	2823.23	2361.37	0.9955	0.885412	1.00184	1.0584	0.957352	0.800736
FGSG_00340	conserved hypothetical protein	1348	1621.87	1505.63	1519.88	1635.74	1323.34	1374.55	1.20317	1.11694	1.12751	1.21346	0.981706	1.0197
FGSG_00342	conserved hypothetical protein	1281	994.74	1885.9	1241.51	1039.26	1373.21	1152.3	0.776534	1.47221	0.969173	0.811288	1.07198	0.899532
FGSG_00343	related to SRO77 - polarized exocytosis by regulating SNARE function	10669	9637.32	11115.3	10665.6	9960.15	10267.4	11194.5	0.903301	1.04183	0.999682	0.93356	0.962356	1.04925
FGSG_00345	related to allantoate permease	974	1506.75	1160.72	1012.92	1674.75	1030.92	1366.09	1.54697	1.1917	1.03996	1.71946	1.05844	1.40256
FGSG_00346	probable saccharopine reductase	9124	7534.74	7111.37	8082.01	7787.57	8344.35	4748.11	0.825815	0.779414	0.885797	0.853526	0.91455	0.520398
FGSG_00347	conserved hypothetical protein	191	211.07	148.13	207.26	385.42	190.01	535.08	1.10508	0.77555	1.08513	2.01791	0.994817	2.80147
FGSG_00348	related to argonaute like post-transcriptional gene silencing protein QDE-2	63370	54352.9	48083.8	64943.6	682.52	58934.7	2410.89	0.857708	0.758779	1.02483	0.0107704	0.930009	0.0380447
FGSG_00349	related to RNA14 - component of pre-mRNA 3`-end processing factor CF I	5667	4809.06	5104.98	5514.66	4815.47	6409.19	5051.28	0.848608	0.900826	0.973118	0.849739	1.13097	0.89135
FGSG_00350	probable ASF1 - anti-silencing protein	17277	17112.5	15075	18839	17434.6	17920.4	11709	0.990477	0.87255	1.09041	1.00912	1.03724	0.677722
FGSG_00351	conserved hypothetical protein	3100	1473.42	3016.78	3772.28	1513.01	2785.49	6423.41	0.475297	0.973155	1.21686	0.488068	0.898545	2.07207
FGSG_00352	related to CCAAT-binding factor HAPB protein	13812	11156.2	12696.1	13829.3	11957.2	13908.6	9183.37	0.807716	0.919209	1.00125	0.865712	1.00699	0.664883
FGSG_00353	related to peroxiredoxin 5, mitochondrial precursor	3381	3388.16	2821.11	3041.8	3404.55	3223.46	2374.66	1.00212	0.834401	0.899675	1.00697	0.953404	0.702354
FGSG_00354	conserved hypothetical protein	2038	2443.92	1883.69	2108.13	2301.05	2022.75	1711.54	1.19918	0.924284	1.03441	1.12907	0.992517	0.839814
FGSG_00355	probable RAS GTPase-activating protein sar1	7951	9898.88	9524.58	9147.75	9602.26	10041	14169.4	1.24499	1.19791	1.15052	1.20768	1.26286	1.78209
FGSG_00357	related to methyltransferase S. pombe	698	561.5	559.36	741.65	586.16	799.13	467.44	0.804441	0.801375	1.06254	0.839771	1.14489	0.669685
FGSG_00358	probable small nuclear ribonucleoprotein	3991	4083.97	3605.98	4142.09	4095.1	4029.33	3069.18	1.02329	0.903528	1.03786	1.02608	1.0096	0.769025
FGSG_00359	related to cullulin 3	7880	6400.64	6848.28	7480.55	6627.86	7216.41	7221.81	0.812264	0.869071	0.949308	0.841099	0.915788	0.916473
FGSG_00360	probable LSM2 - Sm-like (Lsm) protein	1218	1542.09	1225.95	1292.31	1456.8	1277.53	1286.37	1.26608	1.00653	1.06101	1.19606	1.04888	1.05613
FGSG_00361	related to PSO2 - DNA repair protein	2916	2446.95	2378.93	3098.7	2574.06	2767.97	1792.47	0.839146	0.81582	1.06265	0.882737	0.949235	0.614702
FGSG_00362	related to severin kinase	2968	2535.82	2832.17	2780.7	2677.3	2844.79	2943.56	0.854387	0.954235	0.936894	0.902055	0.958487	0.991765
FGSG_00363	conserved hypothetical protein	4360	3782.01	3880.14	4329.03	3874.86	4412.05	3920.72	0.867433	0.88994	0.992897	0.888729	1.01194	0.899248
FGSG_00364	probable ubiquitin-activating enzyme	6024	5165.55	4816.45	6206.53	5049.47	5742.13	3698.47	0.857495	0.799543	1.0303	0.838225	0.953209	0.613956
FGSG_00365	probable DNA-directed RNA polymerase	1666	2161.15	1852.74	1735.27	2060.17	1871.82	1774.35	1.29721	1.11209	1.04158	1.2366	1.12354	1.06504
FGSG_00367	probable proteasome endopeptidase complex chain PUP1	7914	8735.49	8315.21	8005.81	8797	7833.61	7050.29	1.1038	1.0507	1.0116	1.11157	0.989842	0.890863
FGSG_00369	related to ERV46 - component of copii vesicles	5028	4387.94	5928.54	4956.9	4751.23	5155.92	7242.34	0.872701	1.17911	0.985859	0.944954	1.02544	1.4404
FGSG_00370	related to cleavage stimulation factor 64K chain	1558	1897.57	1555.37	1559.51	1930.55	1785.57	1687.38	1.21795	0.998312	1.00097	1.23912	1.14607	1.08304
FGSG_00371	probable MNR2 - Manganese resistance protein	5764	4621.23	4868.41	4871.56	4653.73	6085.77	4316.9	0.80174	0.844624	0.84517	0.807379	1.05582	0.748942
FGSG_00372	conserved hypothetical protein	1392	1579.46	1538.79	1445.72	1600.19	1286.96	1654.77	1.13467	1.10545	1.03859	1.14956	0.92454	1.18877
FGSG_00373	probable H+-transporting two-sector ATPase chain b precursor	9439	9831.21	10763.8	8898.84	9582.76	9228.38	9132.64	1.04155	1.14035	0.942774	1.01523	0.977686	0.967543
FGSG_00374	related to SRC1 - regulation of cohesion (Splice variant I)	7117	6569.29	6297.76	7131.06	6565.92	7507.49	5341.17	0.923042	0.88489	1.00198	0.922568	1.05487	0.750481
FGSG_00375	related to monooxigenase	1170	841.23	973.9	1144.99	937.17	1191.28	725.93	0.719	0.832393	0.978624	0.801	1.01819	0.620453
FGSG_00376	probable NADH dehydrogenase (ubiquinone) 49K chain	9979	8951.61	10711.8	8761.69	9158.33	9553.15	9787.31	0.897045	1.07344	0.878013	0.91776	0.957325	0.980791
FGSG_00377	conserved hypothetical protein	840	1301.74	1410.56	1057.62	1253.77	1080.78	1044.8	1.54969	1.67924	1.25907	1.49258	1.28664	1.24381
FGSG_00378	conserved hypothetical protein	6790	6887.4	6256.86	7380.99	6891.69	6860.64	6033.27	1.01434	0.921482	1.08704	1.01498	1.0104	0.888552
FGSG_00379	conserved hypothetical protein	536	544.33	626.79	626.85	552.9	565.99	649.83	1.01554	1.16938	1.1695	1.03153	1.05595	1.21237
FGSG_00380	related to Ubp11p	4150	3877.95	4129.97	4973.15	4150.16	4040.11	3547.49	0.934446	0.995173	1.19835	1.00004	0.97352	0.854817
FGSG_00381	conserved hypothetical protein	44	42.42	30.95	49.78	37.85	41.78	39.86	0.964091	0.703409	1.13136	0.860227	0.949545	0.905909
FGSG_00383	conserved hypothetical protein	584	670.56	592.52	601.45	673.34	634.72	471.07	1.14822	1.01459	1.02988	1.15298	1.08685	0.806627
FGSG_00384	hypothetical protein	222	429.2	277.47	278.37	412.95	225.05	347.86	1.93333	1.24986	1.25392	1.86014	1.01374	1.56694
FGSG_00385	probable NHP6B - nonhistone chromosomal protein	12784	12649.8	14147.6	11799.4	13345.2	13159.3	13137.9	0.989503	1.10666	0.922983	1.0439	1.02936	1.02768
FGSG_00387	probable PGM2 - phosphoglucomutase, major isoform	21519	19325.1	17829.8	20617	19072.6	20832.6	13668.2	0.89805	0.828563	0.958083	0.886314	0.968102	0.635168
FGSG_00388	probable REX2 - putative 3`-5` exonuclease	1991	2431.8	1935.65	2009.58	2396.26	2134.6	2046.12	1.2214	0.9722	1.00933	1.20355	1.07212	1.02768
FGSG_00389	conserved hypothetical protein	3363	1730.94	3037.78	3903.34	1876.63	3824.49	2743.05	0.514701	0.903295	1.16067	0.558023	1.13723	0.815656
FGSG_00390	conserved hypothetical protein	2195	2369.19	3567.29	2510.45	2381.35	2660.17	5244.54	1.07936	1.62519	1.14371	1.0849	1.21192	2.38931
FGSG_00391	conserved hypothetical protein	9651	9252.55	8347.27	10932.8	8938.09	10214.8	10695.6	0.958714	0.864912	1.13282	0.926131	1.05842	1.10824
FGSG_00392	conserved hypothetical protein	3613	1721.85	3231.24	3272.43	1834.19	2708.68	2526.85	0.476571	0.894337	0.905738	0.507664	0.749704	0.699377
FGSG_00393	conserved hypothetical protein	4270	4423.29	4466.03	3971.41	4318.78	4131.75	4319.31	1.0359	1.04591	0.930073	1.01142	0.967623	1.01155
FGSG_00394	hypothetical protein	14115	13605.1	11127.5	15527	13894.6	16066.1	8939.39	0.963879	0.788344	1.10004	0.984389	1.13823	0.633326
FGSG_00395	probable ribosomal protein S12, cytosolic	26301	20172.4	24284.6	20016.5	20725.5	23566.9	15442.5	0.766983	0.923333	0.761057	0.788014	0.896044	0.587145
FGSG_00397	probable alpha-tubulin B	9787	12687.2	10699.7	9071.56	12383.9	9228.38	10496.3	1.29633	1.09325	0.926899	1.26535	0.942922	1.07248
FGSG_00398	related to nuM1, hnRNP protein	2124	2147.01	2472.9	2255.44	2379.06	2160.21	2408.48	1.01083	1.16427	1.06188	1.12008	1.01705	1.13394
FGSG_00399	related to DEP1 protein, regulator of phospholipid metabolism	2718	2696.39	2936.08	2849.78	2821.83	2703.29	3194.79	0.992049	1.08024	1.04848	1.0382	0.994588	1.17542
FGSG_00402	conserved hypothetical protein	1316	1222.97	1592.96	1390.86	1390.27	1392.07	1648.73	0.929309	1.21046	1.05688	1.05644	1.0578	1.25283
FGSG_00404	conserved hypothetical protein	837	1147.23	839.04	1091.15	1153.97	795.09	1006.15	1.37065	1.00244	1.30364	1.3787	0.949928	1.20209
FGSG_00405	related to transporter protein HOL1	2297	2793.34	2665.25	2575.47	2816.1	2409.51	3371.14	1.21608	1.16032	1.12123	1.22599	1.04898	1.46763
FGSG_00406	conserved hypothetical protein	2121	1105.82	1726.72	1687.52	1113.82	1854.3	1176.46	0.521367	0.814107	0.795625	0.525139	0.874257	0.554672
FGSG_00407	probable 2,4-dienoyl-CoA reductase SPS19	1640	1627.93	1900.27	1882.58	1633.45	1644.07	2038.87	0.99264	1.1587	1.14791	0.996006	1.00248	1.24321
FGSG_00408	related to MAP kinase kinase kinase Wis4	10324	7622.6	9866.16	10154.6	7836.89	11075.9	10878	0.738338	0.955653	0.98359	0.759094	1.07283	1.05366
FGSG_00409	related to cytidine deaminase	13044	13084	11513.3	12272.9	12982.7	12284.7	11570.1	1.00307	0.882649	0.940882	0.995302	0.941792	0.887006
FGSG_00410	conserved hypothetical protein	4824	4887.84	4446.13	4925.4	4943.94	4876.97	3889.32	1.01323	0.921669	1.02102	1.02486	1.01098	0.806244
FGSG_00411	conserved hypothetical protein	1152	1261.34	1554.27	1669.23	1231.97	1277.53	2148.79	1.09491	1.34919	1.44898	1.06942	1.10897	1.86527
FGSG_00412	conserved hypothetical protein	3036	1067.45	2666.35	2818.29	1087.44	4137.14	1755.02	0.351597	0.878244	0.928291	0.358182	1.36269	0.57807
FGSG_00413	related to hsp70 protein	741	331.24	616.84	642.09	352.16	1016.09	387.72	0.447018	0.832443	0.866518	0.47525	1.37124	0.523239
FGSG_00414	related to S.pombe beta-transducin	3686	3024.6	3146.12	3548.77	2945.72	3680.3	2216.43	0.820564	0.853532	0.96277	0.799164	0.998454	0.60131
FGSG_00415	conserved hypothetical protein	7010	9980.68	10882.1	6977.65	9628.64	10179.8	10230.6	1.42378	1.55236	0.995385	1.37356	1.45218	1.45943
FGSG_00416	probable nitrate transport protein crnA	519	928.08	1043.55	618.72	1096.61	745.22	1251.34	1.78821	2.01069	1.19214	2.11293	1.43588	2.41106
FGSG_00417	probable methylenetetrahydrofolate dehydrogenase (NAD+)	1487	1991.49	1604.01	1640.78	2115.23	1431.15	1602.83	1.33927	1.07869	1.10342	1.42248	0.962441	1.0779
FGSG_00418	conserved hypothetical protein	2064	2986.22	3061	2566.33	3104.01	2288.23	4607.99	1.44681	1.48304	1.24338	1.50388	1.10864	2.23255
FGSG_00419	conserved hypothetical protein	2006	2333.84	2029.61	2227	2404.29	2321.92	1531.57	1.16343	1.01177	1.11017	1.19855	1.15749	0.763495
FGSG_00421	probable methionine adenosyltransferase ETH-1	15577	18007.2	21055.5	18664.3	18933.8	15630.8	20015.5	1.15601	1.35171	1.1982	1.2155	1.00346	1.28494
FGSG_00422	conserved hypothetical protein	722	291.86	952.9	734.54	373.95	656.28	542.33	0.404238	1.31981	1.01737	0.517936	0.908975	0.75115
FGSG_00423	related to phosphatidylinositol phospholipase	302	356.49	350.43	362.7	367.07	289.73	306.8	1.18043	1.16036	1.20099	1.21546	0.959371	1.01589
FGSG_00424	conserved hypothetical protein	9933	9840.3	12010.7	10415.7	9851.17	8921.12	12178.9	0.990667	1.20918	1.04859	0.991762	0.898129	1.2261
FGSG_00425	related to PAC2 - involved in the stabilization of microtubles	3501	4508.12	3801.65	3869.81	4380.72	3678.95	4937.74	1.28767	1.08588	1.10534	1.25128	1.05083	1.41038
FGSG_00426	conserved hypothetical protein	2108	5233.22	3051.05	2564.3	4839.56	2476.89	3850.66	2.48255	1.44737	1.21646	2.29581	1.175	1.82669
FGSG_00427	probable pyridoxine 4-dehydrogenase	172	220.15	211.14	218.43	216.8	183.27	292.3	1.27994	1.22756	1.26994	1.26047	1.06552	1.69942
FGSG_00428	related to dynein intermediate chain 1, cytosolic	5388	4915.1	5058.55	5164.15	4902.65	5216.57	4646.64	0.912231	0.938855	0.958454	0.90992	0.968183	0.862405
FGSG_00429	related to F1F0-ATP synthase subunit E	4453	4382.89	4201.82	4335.13	4443.81	4364.88	3560.78	0.984256	0.943593	0.97353	0.997936	0.980211	0.799636
FGSG_00430	probable oligosaccharyltransferase	7721	8885.96	8659.01	7127	8912.86	7415.85	7841.44	1.15088	1.12149	0.923067	1.15437	0.960478	1.0156
FGSG_00431	conserved hypothetical protein	5312	5320.07	4259.31	5817.42	5243.33	4868.89	4240.8	1.00152	0.801828	1.09515	0.987073	0.916583	0.798343
FGSG_00432	hypothetical protein	2029	3060.96	1822.89	2472.86	2905.57	1912.25	1941.03	1.50861	0.898418	1.21876	1.43202	0.942459	0.956644
FGSG_00433	related to protein kinase RAD53	30789	22007.4	22826.5	31022.5	21793.5	29027.3	15176.8	0.714781	0.741384	1.00758	0.707834	0.942783	0.492929
FGSG_00434	conserved hypothetical protein	6952	8270.94	10633.3	7602.47	8805.03	6991.36	15438.9	1.18972	1.52954	1.09357	1.26655	1.00566	2.22078
FGSG_00435	conserved hypothetical protein	1692	2364.14	2335.82	1928.3	2373.32	1835.43	2451.96	1.39725	1.38051	1.13966	1.40267	1.08477	1.44915
FGSG_00436	conserved hypothetical protein	1036	1448.17	1258	1210.02	1431.56	1067.3	1090.7	1.39785	1.21429	1.16797	1.38181	1.03021	1.0528
FGSG_00437	conserved hypothetical protein	5940	4586.89	5676.5	5239.33	4711.08	5665.32	5104.42	0.772204	0.95564	0.882042	0.793111	0.953758	0.85933
FGSG_00438	conserved hypothetical protein	6423	6171.4	9179.67	7555.74	6440.89	6933.41	11001.2	0.960828	1.42919	1.17636	1.00279	1.07947	1.71278
FGSG_00439	conserved hypothetical protein	2124	2277.29	2008.61	1944.56	2418.06	1913.59	2125.84	1.07217	0.945673	0.915518	1.13845	0.900937	1.00087
FGSG_00440	related to citrate lyase beta subunit	790	808.92	677.64	787.37	778.87	750.61	826.18	1.02395	0.857772	0.996671	0.985911	0.950139	1.0458
FGSG_00441	conserved hypothetical protein	1356	1460.29	1251.37	1217.13	1465.98	1414.98	1084.66	1.07691	0.922839	0.897588	1.08111	1.0435	0.799897
FGSG_00442	related to glycine-rich RNA-binding protein	1329	2157.11	1636.07	1410.16	2226.49	1544.35	2553.42	1.62311	1.23105	1.06107	1.67531	1.16204	1.92131
FGSG_00443	related to E.coli cation transport protein	262	314.07	390.22	302.76	295.95	260.09	373.23	1.19874	1.48939	1.15557	1.12958	0.99271	1.42454
FGSG_00444	related to programmed cell death protein (calcium-binding protein)	3361	3494.2	3577.24	3266.33	3662.65	3395.96	3912.26	1.03963	1.06434	0.971833	1.08975	1.0104	1.16402
FGSG_00446	conserved hypothetical protein	1004	938.18	914.21	936.72	1028.94	1065.95	820.14	0.934442	0.910568	0.932988	1.02484	1.0617	0.816873
FGSG_00447	conserved hypothetical protein	2389	2464.12	1950.02	3154.57	2240.26	2428.38	1455.47	1.03144	0.816249	1.32046	0.93774	1.01648	0.609238
FGSG_00448	probable pre-mRNA splicing factor ATP-dependent RNA helicase PRP16	3591	3157.91	3629.2	3507.11	3223.31	3519.94	3444.82	0.879396	1.01064	0.976639	0.897608	0.980212	0.959293
FGSG_00449	related to WD repeat protein IEF SSP 9502	2330	2910.48	2802.32	2702.47	3185.46	2354.26	2849.35	1.24913	1.20271	1.15986	1.36715	1.01041	1.2229
FGSG_00450	conserved hypothetical protein	15182	20298.7	21148.4	17374	20682	15656.4	34532.8	1.33702	1.39299	1.14438	1.36227	1.03125	2.27459
FGSG_00452	related to nodulation protein nodB	10095	10591.7	8063.17	11999.6	10455.7	9834.8	7037	1.0492	0.798729	1.18866	1.03573	0.974225	0.697078
FGSG_00453	conserved hypothetical protein	41	126.24	50.85	46.73	127.33	148.24	56.77	3.07902	1.24024	1.13976	3.10561	3.61561	1.38463
FGSG_00455	conserved hypothetical protein	6790	7009.6	6748.79	6549.93	7129.14	6515.65	5062.15	1.03234	0.993931	0.964644	1.04995	0.959595	0.74553
FGSG_00456	conserved hypothetical protein	1280	1121.98	998.22	1344.12	1162	1421.72	867.24	0.876547	0.779859	1.05009	0.907813	1.11072	0.677531
FGSG_00457	conserved hypothetical protein	624	736.2	1233.68	750.8	719.22	718.27	539.91	1.17981	1.97705	1.20321	1.1526	1.15107	0.86524
FGSG_00458	related to LSM6 - Sm-like (Lsm) protein	1288	1565.32	1363.02	1269.96	1424.68	1522.79	1219.94	1.21531	1.05825	0.985994	1.10612	1.18229	0.947158
FGSG_00459	conserved hypothetical protein	4523	4693.94	4170.87	4650.07	4652.58	5331.11	4262.54	1.03779	0.922147	1.02809	1.02865	1.17867	0.942414
FGSG_00460	related to NAD-dependent histone deacetylases	6700	7282.27	5981.6	8314.66	7733.65	6972.49	5037.99	1.08691	0.892776	1.24099	1.15428	1.04067	0.751939
FGSG_00461	related to mitochondrial rhomboid protease	3028	2189.43	2521.54	3137.3	2293.02	3045.58	1762.27	0.723061	0.832741	1.0361	0.757272	1.00581	0.581991
FGSG_00462	conserved hypothetical protein	1601	1913.73	1690.24	1547.32	1943.16	1797.7	1456.68	1.19533	1.05574	0.966471	1.21372	1.12286	0.909856
FGSG_00463	conserved hypothetical protein	8437	6327.93	6841.64	7055.88	6366.33	7588.35	5048.86	0.750021	0.810909	0.836302	0.754573	0.899413	0.598419
FGSG_00464	conserved hypothetical protein	6361	7548.88	6704.57	5813.36	7677.45	6004.91	6806.3	1.18674	1.05401	0.913907	1.20696	0.94402	1.07
FGSG_00465	conserved hypothetical protein	1905	1628.94	2235.22	1752.54	1673.6	2047.01	1740.53	0.855087	1.17334	0.919969	0.87853	1.07455	0.913664
FGSG_00466	related to Sm-like protein LSm8	1006	1283.56	1138.62	1036.28	1300.8	1113.12	1209.07	1.2759	1.13183	1.0301	1.29304	1.10648	1.20186
FGSG_00467	related to C-type cyclin	3907	4437.43	4374.27	4027.29	4696.17	4979.39	4798.84	1.13576	1.1196	1.03079	1.20199	1.27448	1.22827
FGSG_00468	related to U4/U6 small nuclear ribonucleoprotein	1503	1816.78	1548.74	1553.41	1812.4	1737.06	1456.68	1.20877	1.03043	1.03354	1.20585	1.15573	0.969182
FGSG_00469	probable protein kinase	6433	5733.11	7105.85	6602.76	5639.07	6822.91	5843.64	0.891203	1.10459	1.02639	0.876585	1.06061	0.908385
FGSG_00470	conserved hypothetical protein	4515	7906.38	8666.74	6392.46	7646.48	5514.39	10524.1	1.75114	1.91954	1.41583	1.69357	1.22135	2.33092
FGSG_00471	related to F1F0-ATPase complex, subunit h	10278	10455.3	9824.15	10123.1	10664.5	9984.38	8851.21	1.01725	0.955843	0.984927	1.0376	0.971432	0.86118
FGSG_00472	probable protein kinase sck1, cAMP-dependent	12386	9152.57	11776.4	10535.6	9589.64	11239	10191.9	0.738945	0.950782	0.850602	0.774232	0.907395	0.82286
FGSG_00474	conserved hypothetical protein	1360	1136.12	1275.69	1292.31	1221.65	1362.43	1523.11	0.835382	0.938007	0.950228	0.898272	1.00179	1.11993
FGSG_00475	related to nuclear prelamin A recognition factor	3287	3412.4	3571.72	3189.12	3401.11	3301.62	3461.73	1.03815	1.08662	0.970222	1.03472	1.00445	1.05316
FGSG_00476	conserved hypothetical protein	1080	1624.9	1122.03	1193.76	1534.8	1039	856.37	1.50454	1.03892	1.10533	1.42111	0.962037	0.792935
FGSG_00477	conserved hypothetical protein	3803	3495.21	3418.06	3831.21	3596.11	3975.43	2756.34	0.919067	0.89878	1.00742	0.945598	1.04534	0.72478
FGSG_00478	probable 2-dehydro-3-deoxyphosphoheptonate aldolase	3625	3254.85	3250.03	3140.35	3336.87	3658.74	2387.94	0.89789	0.89656	0.866303	0.920516	1.00931	0.658742
FGSG_00479	conserved hypothetical protein	34	52.51	34.27	29.46	51.62	28.3	33.82	1.54441	1.00794	0.866471	1.51824	0.832353	0.994706
FGSG_00480	probable cyclophilin E	1579	1457.26	1791.94	1619.45	1525.62	1739.75	1562.97	0.922901	1.13486	1.02562	0.966194	1.1018	0.989848
FGSG_00481	conserved hypothetical protein	1016	589.77	624.58	850.36	598.78	917.72	502.47	0.580482	0.614744	0.836969	0.58935	0.903268	0.494557
FGSG_00482	conserved hypothetical protein	1165	1668.33	1223.74	1250.65	1638.04	1599.6	971.12	1.43204	1.05042	1.07352	1.40604	1.37305	0.833579
FGSG_00483	conserved hypothetical protein	1809	1117.94	1615.07	1704.79	1213.62	1708.76	1641.48	0.617988	0.892797	0.942394	0.670879	0.944588	0.907396
FGSG_00484	conserved hypothetical protein	310	335.28	271.94	274.31	356.74	326.12	183.6	1.08155	0.877226	0.884871	1.15077	1.052	0.592258
FGSG_00485	conserved hypothetical protein	1502	1576.43	1763.2	1489.41	1730.95	1375.9	1478.42	1.04955	1.1739	0.991618	1.15243	0.916045	0.984301
FGSG_00486	conserved hypothetical protein	1627	1379.5	1936.75	1552.4	1368.47	1518.75	1689.8	0.84788	1.19038	0.954149	0.8411	0.933467	1.0386
FGSG_00487	conserved hypothetical protein	410	593.81	529.51	484.62	542.57	427.19	735.59	1.44832	1.29149	1.182	1.32334	1.04193	1.79412
FGSG_00489	related to phenol 2-monooxygenase	6896	5002.96	6341.98	6312.19	5168.77	6115.42	5541.67	0.725487	0.919661	0.915341	0.749532	0.886807	0.803606
FGSG_00490	probable methylmalonate-semialdehyde dehydrogenase (acylating)	4301	3277.07	4257.1	4034.4	3173.99	3863.57	4211.81	0.761932	0.989793	0.938014	0.737966	0.898296	0.979263
FGSG_00491	probable calcium-binding protein precursor cnx1	22328	20514.8	22219.6	21440.9	20306.9	21484.8	20621.8	0.918791	0.995145	0.960271	0.90948	0.962236	0.923586
FGSG_00492	conserved hypothetical protein	31028	31059	35703.9	28674.6	30776.3	26782.2	46311.8	1.001	1.1507	0.924153	0.991889	0.863164	1.49258
FGSG_00493	conserved hypothetical protein	1271	1583.5	1567.53	1414.22	1574.95	1386.68	1643.9	1.24587	1.2333	1.11268	1.23914	1.09101	1.29339
FGSG_00494	conserved hypothetical protein	2251	2595.4	2430.89	2295.07	2676.15	2429.73	2037.66	1.153	1.07992	1.01958	1.18887	1.0794	0.905224
FGSG_00495	probable ribosomal protein YmL44, mitochondrial	1423	1462.31	1294.48	1455.88	1413.21	1251.92	1073.79	1.02762	0.909684	1.02311	0.99312	0.879775	0.754596
FGSG_00496	probable inorganic pyrophosphatase	16589	18511.2	17653	14736.6	18425.6	15535.1	14162.2	1.11587	1.06414	0.888334	1.11071	0.936473	0.853709
FGSG_00497	conserved hypothetical protein	14195	15421.9	10699.7	12725	14522.1	12767.2	11852.8	1.08643	0.753763	0.89644	1.02304	0.899414	0.834995
FGSG_00499	probable oligosaccharyltransferase alpha subunit	6510	6901.54	6812.9	5417.13	7084.4	5995.48	6145.6	1.06014	1.04653	0.832124	1.08823	0.920965	0.944025
FGSG_00500	probable hexokinase	26077	24553.3	20762.6	24141.4	23927.1	23634.2	19229.2	0.941569	0.796204	0.925773	0.917555	0.906325	0.737399
FGSG_00501	related to protein-arginine N-methyltransferase	1228	910.91	1214.89	1195.79	1027.79	1196.67	966.29	0.741783	0.989324	0.97377	0.836963	0.974487	0.786881
FGSG_00502	related to polyphosphate synthetase	19000	15952.1	15908.6	19298.3	16335.6	18424.4	10864.7	0.839585	0.837293	1.0157	0.859771	0.969706	0.571827
FGSG_00503	related to O-succinylhomoserine (thiol)-lyase	3428	5075.67	3472.23	3391.29	4595.23	2722.16	4750.52	1.48065	1.0129	0.989291	1.3405	0.794096	1.3858
FGSG_00504	probable replication licensing factor MCM4	3237	3305.35	3475.54	3377.07	3442.41	3197.86	3170.64	1.02112	1.07369	1.04327	1.06346	0.987909	0.9795
FGSG_00505	related to coatomer protein zeta chain	3440	3968.84	4387.54	3489.84	4144.42	3460.64	4327.77	1.15373	1.27545	1.01449	1.20477	1.006	1.25807
FGSG_00506	related to translation initiation protein SUA5	828	1090.67	783.77	943.83	1172.32	784.3	811.68	1.31723	0.946582	1.13989	1.41585	0.947222	0.98029
FGSG_00507	related to conserved oligomeric golgi complex component 4	4778	4402.08	5089.5	4504.79	4553.93	4773.21	5718.02	0.921323	1.06519	0.942819	0.953104	0.998997	1.19674
FGSG_00508	probable calcium P-type ATPase	3108	2936.74	3722.06	3391.29	3045.51	3271.98	4197.32	0.944897	1.19757	1.09115	0.979894	1.05276	1.35049
FGSG_00509	related to double-strand-break repair protein rad21	11226	10566.4	10760.5	11719.2	10625.5	11266	9612.17	0.941244	0.958531	1.04393	0.946505	1.00356	0.856242
FGSG_00510	related to beta-tubulin binding protein	3045	3296.26	2842.12	3211.47	3297.87	3099.48	2535.3	1.08252	0.933373	1.05467	1.08304	1.01789	0.832611
FGSG_00511	conserved hypothetical protein	3655	3931.48	3449.01	3858.64	3792.27	3917.48	2656.09	1.07564	0.943642	1.05572	1.03756	1.07181	0.7267
FGSG_00512	conserved hypothetical protein	4186	4409.15	4033.79	4734.4	4592.93	4774.55	3976.28	1.05331	0.963638	1.13101	1.09721	1.1406	0.9499
FGSG_00513	conserved hypothetical protein	842	782.66	885.47	851.38	838.52	958.14	1093.12	0.929525	1.05163	1.01114	0.995867	1.13793	1.29824
FGSG_00514	conserved hypothetical protein	2027	1881.41	2404.36	2210.74	1864.01	2375.82	2850.55	0.928175	1.18617	1.09065	0.919591	1.17209	1.40629
FGSG_00515	conserved hypothetical protein	7260	6854.08	9218.37	7384.04	7179.61	7899.64	11820.1	0.944088	1.26975	1.01709	0.988927	1.0881	1.62812
FGSG_00516	hypothetical protein	327	409	354.85	357.62	490.95	260.09	437.25	1.25076	1.08517	1.09364	1.50138	0.795382	1.33716
FGSG_00517	conserved hypothetical protein	857	13042.6	2858.7	1565.6	12149.9	1165.68	5006.59	15.2189	3.33571	1.82684	14.1773	1.36019	5.842
FGSG_00518	related to MOB2 protein, required for maintenance in ploidy	4432	5340.26	4800.98	4619.6	5246.77	4127.7	5958.38	1.20493	1.08325	1.04233	1.18384	0.93134	1.3444
FGSG_00519	conserved hypothetical protein	4949	4761.6	4795.45	5194.63	4779.91	5385.02	3471.4	0.962134	0.968974	1.04963	0.965834	1.0881	0.701435
FGSG_00520	conserved hypothetical protein	7345	8279.02	7250.66	7836.14	8199.37	7883.47	6822	1.12716	0.987156	1.06687	1.11632	1.07331	0.928795
FGSG_00521	hypothetical protein	2469	1828.9	1742.19	2636.43	1873.19	2425.68	1168	0.740745	0.705626	1.06781	0.758684	0.982454	0.473066
FGSG_00522	conserved hypothetical protein	1102	1231.05	1261.32	1212.05	1250.32	1167.02	1878.23	1.11711	1.14457	1.09986	1.13459	1.059	1.70438
FGSG_00523	related to extracellular matrix protein precursor	71098	62775.4	58380	73838.4	64392.8	70262.6	54934.8	0.882941	0.821121	1.03854	0.905691	0.98825	0.772663
FGSG_00524	probable UTP-glucose-1-phosphate uridylyltransferase	28782	32046.6	29932.3	28618.7	31597.6	30282	26688.9	1.11343	1.03997	0.994328	1.09783	1.05211	0.927278
FGSG_00525	conserved hypothetical protein	3457	8892.02	7000.83	4353.41	8793.56	4125.01	8485.23	2.57218	2.02512	1.2593	2.5437	1.19323	2.45451
FGSG_00526	related to dihydroneopterin aldolase	1823	2285.37	1878.16	1997.39	2237.96	1893.38	2101.68	1.25363	1.03026	1.09566	1.22762	1.03861	1.15287
FGSG_00528	conserved hypothetical protein	3117	2738.8	2638.71	3101.74	2770.21	3103.53	1777.97	0.878665	0.846554	0.995104	0.888742	0.995679	0.570411
FGSG_00529	probable ammonium transporter MEAA	4883	6328.94	11166.2	5603.05	7209.44	8430.6	16431.8	1.29612	2.28674	1.14746	1.47644	1.72652	3.36509
FGSG_00530	related to phytase	2771	2509.56	2751.47	2708.56	2552.27	2598.18	3057.1	0.905651	0.992952	0.977467	0.921065	0.937633	1.10325
FGSG_00531	conserved hypothetical protein	91887	118895	80824	106022	115423	87022.7	72011.5	1.29392	0.879602	1.15383	1.25614	0.947062	0.783696
FGSG_00534	conserved hypothetical protein	8017	7450.92	7512.65	8576.78	7273.67	7723.11	7096.19	0.92939	0.93709	1.06982	0.907281	0.963342	0.885143
FGSG_00535	conserved hypothetical protein	446	573.61	456.55	457.18	611.4	433.93	407.05	1.28612	1.02365	1.02507	1.37085	0.972937	0.912668
FGSG_00536	conserved hypothetical protein	3886	3648.71	3783.96	3450.22	3475.67	3817.76	3861.53	0.938937	0.973742	0.887859	0.894408	0.98244	0.993703
FGSG_00537	related to 5-methylcytosine G/T mismatch-specific DNA glycosylase	1749	2018.76	1731.14	2123.37	2100.31	1715.5	1821.46	1.15424	0.989788	1.21405	1.20086	0.980846	1.04143
FGSG_00538	related to surfeit locus protein 4	5879	3794.13	5854.47	3824.09	3733.77	5858.02	4424.4	0.64537	0.995828	0.650466	0.635103	0.996431	0.752577
FGSG_00539	related to major facilitator MirA	206	384.77	202.3	199.13	378.54	169.8	333.37	1.86782	0.982039	0.96665	1.83757	0.824272	1.6183
FGSG_00540	conserved hypothetical protein	281	882.64	444.39	383.02	798.37	474.36	458.99	3.14107	1.58146	1.36306	2.84117	1.68811	1.63342
FGSG_00541	related to multidrug resistance protein	1979	1929.89	1852.74	2004.5	1971.84	1788.27	2042.49	0.975184	0.9362	1.01289	0.996382	0.903623	1.03208
FGSG_00542	conserved hypothetical protein	397	328.21	261.99	442.96	314.3	377.33	245.2	0.826725	0.659924	1.11577	0.791688	0.950453	0.617632
FGSG_00543	related to CDC14 - dual specificity phosphatase	4603	4662.63	4558.88	4740.5	4652.58	5033.29	3299.88	1.01295	0.990415	1.02987	1.01077	1.09348	0.716898
FGSG_00545	related to transcription factor NUC-1	4634	4877.74	4721.39	4458.06	4915.26	4658.66	4373.67	1.0526	1.01886	0.962033	1.06069	1.00532	0.943822
FGSG_00546	conserved hypothetical protein	1925	2409.58	2003.08	2007.55	2193.23	2121.13	2162.07	1.25173	1.04056	1.04288	1.13934	1.10189	1.12315
FGSG_00549	conserved hypothetical protein	9606	8379	7584.51	9596.81	8661.65	9937.22	8413.97	0.872267	0.78956	0.999043	0.901692	1.03448	0.875908
FGSG_00550	conserved hypothetical protein	3950	3508.33	3189.23	3764.15	3403.4	3809.67	2326.34	0.888185	0.8074	0.952949	0.86162	0.964473	0.588947
FGSG_00551	related to QDE3 protein (involved in gene silencing)	6690	5975.48	5796.99	6439.19	6202.29	6650.41	5589.98	0.893196	0.866516	0.96251	0.927099	0.994082	0.835572
FGSG_00552	conserved hypothetical protein	6579	5892.67	5759.41	5990.13	5808.84	6581.69	5448.67	0.895679	0.875423	0.910492	0.882937	1.00041	0.828191
FGSG_00553	conserved hypothetical protein	4960	4335.43	4049.27	5110.31	4287.81	5475.31	3506.42	0.874079	0.816385	1.0303	0.864478	1.10389	0.70694
FGSG_00554	conserved hypothetical protein	662	1437.06	1078.92	868.65	1412.06	625.29	1335.9	2.17079	1.62979	1.31216	2.13302	0.944547	2.01798
FGSG_00555	conserved hypothetical protein	2777	2191.45	2204.27	2755.3	2134.73	2804.36	2238.17	0.789143	0.793759	0.992186	0.768718	1.00985	0.805967
FGSG_00556	related to COX17 protein	4147	3955.71	3163.8	4752.69	3811.77	4491.56	2465.25	0.953873	0.762913	1.14605	0.919163	1.08309	0.594466
FGSG_00557	conserved hypothetical protein	516	411.02	333.85	456.17	404.92	493.22	201.71	0.79655	0.646996	0.88405	0.784729	0.955853	0.390911
FGSG_00558	probable chaperonin CCT4, cytosolic	5932	6324.9	6827.27	5766.62	6390.42	5802.77	6541.78	1.06623	1.15092	0.972121	1.07728	0.978215	1.1028
FGSG_00559	probable 26S proteasome regulatory subunit YTA3	12182	13546.6	11896.9	12947.5	13254.6	12271.3	10062.7	1.11202	0.976595	1.06284	1.08805	1.00733	0.82603
FGSG_00560	conserved hypothetical protein	4939	4744.43	4673.85	4943.69	4744.35	4879.67	3758.87	0.960605	0.946315	1.00095	0.960589	0.987987	0.761059
FGSG_00561	probable ubiquinol-cytochrome-c reductase cytochrome c1 precursor	7940	6969.2	8223.46	7233.68	7303.5	7461.67	7428.35	0.877733	1.0357	0.911043	0.919836	0.939757	0.93556
FGSG_00562	probable ran GTPase activating protein 1	6794	7882.14	6720.04	7284.47	7844.92	6878.16	7855.93	1.16016	0.989114	1.07219	1.15468	1.01239	1.1563
FGSG_00563	conserved hypothetical protein	3483	3860.78	3600.46	3816.98	3661.5	3700.51	3526.96	1.10846	1.03372	1.09589	1.05125	1.06245	1.01262
FGSG_00564	probable 20S proteasome subunit C1	7232	7953.84	7605.51	7132.08	7938.98	7475.15	6881.19	1.09981	1.05165	0.986184	1.09776	1.03362	0.951492
FGSG_00565	related to protein-tyrosine-phosphatase	5061	3808.27	3800.54	5070.68	3731.47	4814.98	2802.24	0.752474	0.750946	1.00191	0.737299	0.951389	0.553693
FGSG_00566	conserved hypothetical protein	797	859.41	785.98	760.96	929.14	787	694.52	1.07831	0.986173	0.95478	1.1658	0.987453	0.871418
FGSG_00567	related to papaya ringspot virus polyprotein	5073	4702.02	5145.88	4854.28	4677.82	4606.1	5484.9	0.926872	1.01437	0.956885	0.922101	0.907964	1.08119
FGSG_00568	conserved hypothetical protein	1539	1813.75	1420.51	1955.73	1806.66	1536.27	1662.02	1.17853	0.923008	1.27078	1.17392	0.998226	1.07994
FGSG_00569	conserved hypothetical protein	71157	48561.2	42022.7	69091.8	46514.3	69284.2	24309.4	0.682452	0.590563	0.970976	0.653686	0.973681	0.341631
FGSG_00570	related to SFH1 subunit of the RSC complex	3564	3572.97	3837.02	3768.22	3901.24	4096.71	3818.05	1.00252	1.0766	1.0573	1.09462	1.14947	1.07128
FGSG_00571	probable cellulose 1,4-beta-cellobiosidase	769	644.31	684.27	785.34	625.16	772.18	643.79	0.837854	0.889818	1.02125	0.812952	1.00414	0.837178
FGSG_00572	related to HXT3 - Low-affinity hexose facilitator	1114	1051.29	966.17	1000.73	1080.56	1164.33	653.45	0.943707	0.867298	0.898321	0.969982	1.04518	0.58658
FGSG_00573	related to GAL4-like transcriptional activator	20534	16132.9	17878.5	19830.6	15934.2	19130.5	12578.7	0.785667	0.870677	0.965746	0.77599	0.931652	0.612578
FGSG_00574	related to purine utilization positive regulator	15509	11313.7	14616.3	13366	11313.7	14946.2	9527.61	0.729494	0.942439	0.861825	0.729493	0.963715	0.614328
FGSG_00576	related to cytosolic Cu/Zn superoxide dismutase	14667	14313.1	13520.8	15598.1	14549.6	15058.1	15481.2	0.97587	0.921851	1.06348	0.991998	1.02667	1.05551
FGSG_00577	conserved hypothetical protein	2432	2689.32	2513.8	2611.03	2742.68	2723.5	2431.43	1.10581	1.03363	1.07361	1.12775	1.11986	0.999766
FGSG_00578	related to short-chain alcohol dehydrogenase	2256	1388.59	1580.8	1747.46	1335.21	2230.28	1036.35	0.61551	0.700709	0.774583	0.591848	0.988599	0.459375
FGSG_00581	related to VPS9	7061	6305.71	6005.92	7426.71	6351.42	7421.24	5332.71	0.893034	0.850576	1.05179	0.899507	1.05102	0.755234
FGSG_00582	conserved hypothetical protein	308	544.33	439.97	324.09	509.31	375.98	404.63	1.76731	1.42847	1.05224	1.6536	1.22071	1.31373
FGSG_00583	related to calcium-related spray protein	2419	2120.75	2711.67	2671.99	2227.64	2371.78	2822.77	0.876705	1.12099	1.10458	0.920893	0.98048	1.16692
FGSG_00584	conserved hypothetical protein	8114	10318	11689	9518.58	10556.6	9736.42	19035.9	1.27163	1.4406	1.17311	1.30104	1.19995	2.34606
FGSG_00585	conserved hypothetical protein	1201	1415.86	1270.16	1320.76	1397.15	1347.6	1845.61	1.1789	1.05759	1.09972	1.16332	1.12206	1.53673
FGSG_00586	conserved hypothetical protein	924	964.44	1323.23	1012.92	1020.91	994.53	1983.31	1.04377	1.43207	1.09623	1.10488	1.07633	2.14644
FGSG_00587	related to ribosomal protein YmS2, mitochondrial	1164	1355.26	1241.42	1094.19	1362.74	1051.13	1183.7	1.16431	1.06651	0.940026	1.17074	0.903033	1.01692
FGSG_00588	conserved hypothetical protein	2967	3877.95	3712.11	3286.65	4119.19	3347.44	3918.3	1.30703	1.25113	1.10774	1.38834	1.12822	1.32063
FGSG_00589	probable RPE1 - D-ribulose-5-phosphate 3-epimerase	2107	1684.49	2011.92	1721.05	1752.75	1968.85	1763.48	0.799473	0.954874	0.816825	0.83187	0.934433	0.836963
FGSG_00590	conserved hypothetical protein	1334	1420.91	1462.51	1228.3	1498.09	1292.35	1160.76	1.06515	1.09633	0.920765	1.12301	0.968778	0.870135
FGSG_00591	conserved hypothetical protein	5717	4044.58	4554.46	5491.29	4059.54	5615.46	3507.63	0.707465	0.796652	0.96052	0.710082	0.982239	0.613544
FGSG_00592	conserved hypothetical protein	16151	16726.7	17675.1	15304.5	16372.4	17644.2	17401.7	1.03564	1.09436	0.947589	1.01371	1.09245	1.07744
FGSG_00593	related to aminotriazole resistance protein	1033	1814.76	2329.19	1234.4	2025.75	1033.61	3332.49	1.75679	2.25478	1.19497	1.96104	1.00059	3.22603
FGSG_00594	conserved hypothetical protein	78	81.8	85.12	94.48	60.8	68.73	134.07	1.04872	1.09128	1.21128	0.779487	0.881154	1.71885
FGSG_00595	related to ATPases	20050	8308.31	15223.2	14753.9	8676.56	20161.5	9584.38	0.41438	0.759261	0.735853	0.432746	1.00556	0.478024
FGSG_00596	probable ASP3-1 - L-asparaginase II	1179	1042.2	1599.59	1421.34	1276.71	1224.97	1948.28	0.883969	1.35673	1.20555	1.08288	1.03899	1.65249
FGSG_00597	probable transcription initiation factor IIB	16819	14587.8	15657.6	16268.7	15268.9	17840.9	16924.6	0.867338	0.930948	0.967279	0.907834	1.06076	1.00628
FGSG_00598	related to anthranilate phosphoribosyltransferase	10814	1693.57	10121.5	7497.83	1815.84	15594.5	2675.41	0.156609	0.935964	0.693345	0.167916	1.44206	0.247402
FGSG_00599	conserved hypothetical protein	1302	1320.93	1973.23	1560.52	1572.65	1509.31	3540.24	1.01454	1.51554	1.19856	1.20787	1.15922	2.71908
FGSG_00600	related to alpha-methylacyl-coa racemase	702	838.2	1115.4	882.87	880.96	797.78	1323.82	1.19402	1.58889	1.25765	1.25493	1.13644	1.88578
FGSG_00602	conserved hypothetical protein	215	327.2	374.75	349.49	290.21	140.15	2805.86	1.52186	1.74302	1.62553	1.34981	0.65186	13.0505
FGSG_00603	conserved hypothetical protein	3220	4108.21	4939.16	3740.79	4639.96	3391.91	6385.97	1.27584	1.5339	1.16174	1.44098	1.05339	1.98322
FGSG_00604	related to asparagine synthases	951	1091.68	868.89	1034.25	1204.44	932.54	939.72	1.14793	0.913659	1.08754	1.2665	0.980589	0.988139
FGSG_00606	hypothetical protein	1021	1100.77	864.46	1066.76	1039.26	1055.17	780.28	1.07813	0.84668	1.04482	1.01788	1.03347	0.764231
FGSG_00607	conserved hypothetical protein	3995	3914.31	3875.72	4436.72	4198.33	4324.45	3436.37	0.979802	0.970143	1.11057	1.0509	1.08247	0.860168
FGSG_00608	probable dolichyl-phosphate-mannose--protein O-mannosyltransferase	17284	9252.55	17125.7	14436.9	9454.28	21196.4	13317.9	0.535325	0.990839	0.835274	0.546996	1.22636	0.770533
FGSG_00609	probable BRT1 protein, down-regulated by mating factor B	2995	2347.98	2669.67	2471.84	2298.76	3387.87	1902.38	0.783967	0.891376	0.825322	0.767533	1.13118	0.635185
FGSG_00610	probable Arp2/3 protein complex subunit sop2	5793	5424.08	5586.96	5525.84	5422.28	5798.73	5120.13	0.936316	0.964433	0.953882	0.936006	1.00099	0.883848
FGSG_00612	related to alpha-mannosidase MNS1	23151	20726.8	18610.3	25014.1	20610.8	23208.4	11729.5	0.89529	0.803865	1.08048	0.890279	1.00248	0.506654
FGSG_00613	probable amino acid transport protein GAP1	1228	1876.36	2046.19	1528.01	1874.34	1365.12	3025.69	1.52798	1.66628	1.24431	1.52634	1.11166	2.46392
FGSG_00614	conserved hypothetical protein	27188	23274.8	23296.3	27399.6	23842.2	27546.3	17178.2	0.856068	0.85686	1.00778	0.876938	1.01318	0.631831
FGSG_00615	related to carboxypeptidase Y-sorting protein PEP1 precursor	11625	10886.5	13081.9	11865.5	11021.2	11702.6	14249.1	0.936477	1.12533	1.02068	0.94806	1.00667	1.22573
FGSG_00616	conserved hypothetical protein	2766	3596.19	3786.17	3528.45	3608.73	2618.39	6356.98	1.30014	1.36883	1.27565	1.30467	0.946634	2.29826
FGSG_00618	conserved hypothetical protein	1997	1587.54	2152.32	2052.25	1609.36	2509.23	2902.49	0.794962	1.07778	1.02767	0.805889	1.2565	1.45343
FGSG_00619	hypothetical protein	5408	5440.24	4439.5	6041.95	5359.19	5327.07	2880.75	1.00596	0.820913	1.11722	0.990974	0.985035	0.532683
FGSG_00620	probable ammonium transporter MEPa	5088	7015.66	13898.9	5386.65	7733.65	9896.79	18508.1	1.37886	2.73169	1.0587	1.51998	1.94512	3.63759
FGSG_00621	related to DNA-directed DNA polymerase lambda	1075	1954.12	1126.46	1366.47	2005.11	1079.43	1645.11	1.81779	1.04787	1.27113	1.86522	1.00412	1.53033
FGSG_00622	related to peroxisomal membrane protein 4	1660	1701.65	1849.42	1633.67	1679.33	1827.35	1468.76	1.02509	1.11411	0.984139	1.01164	1.10081	0.884795
FGSG_00623	related to COP9 signalosome subunit 4	3452	4071.85	3547.4	3208.42	4307.31	3211.33	3138.03	1.17956	1.02764	0.929438	1.24777	0.930281	0.909047
FGSG_00624	conserved hypothetical protein	1201	2146	1303.33	1101.31	2513.27	1039	1084.66	1.78684	1.0852	0.916994	2.09265	0.865112	0.903131
FGSG_00625	conserved hypothetical protein	741	701.87	622.37	805.66	741.02	711.53	503.68	0.947193	0.839906	1.08726	1.00003	0.960229	0.67973
FGSG_00626	related to recQ gene for DNA helicase	1821	2023.81	1825.1	1849.06	2003.96	2195.24	1910.84	1.11137	1.00225	1.01541	1.10047	1.20551	1.04934
FGSG_00627	related to adenylate cyclases	3133	2601.46	3103	3477.65	2688.77	4629.01	4443.72	0.830342	0.990425	1.11001	0.858209	1.4775	1.41836
FGSG_00628	conserved hypothetical protein	1233	1262.35	1309.96	1322.79	1315.71	1525.49	1614.91	1.0238	1.06242	1.07282	1.06708	1.23722	1.30974
FGSG_00629	related to TSC13 - required for elongation of VLCFA moiety of sphingolipids	2397	2111.67	2258.44	1944.56	2141.61	2162.9	1707.92	0.880964	0.942194	0.811247	0.893454	0.902336	0.712524
FGSG_00631	probable ribosomal protein Rps8bp	24756	14720.1	21097.5	17803.8	16134.9	21486.2	13403.6	0.594606	0.85222	0.71917	0.651758	0.867917	0.54143
FGSG_00633	related to TOM1 protein	79839	53968.2	62461.4	85161.3	53158.3	76763.4	105729	0.675962	0.782341	1.06666	0.665818	0.961478	1.32428
FGSG_00634	probable 40s ribosomal protein S6.e, cytosolic	24217	16629.8	21759.7	18075	17304.9	20621	13493	0.686697	0.898531	0.746378	0.714578	0.851509	0.557172
FGSG_00635	conserved hypothetical protein	1047	868.5	991.59	955.01	908.49	966.23	1052.05	0.829513	0.947077	0.912139	0.867708	0.922856	1.00482
FGSG_00636	probable candidate tumor suppressor DPH2L1	1071	1247.21	1129.77	1121.63	1288.18	956.8	1140.22	1.16453	1.05487	1.04727	1.20278	0.893371	1.06463
FGSG_00637	probable H+-exporting ATPase 57K chain, vacuolar	20670	22212.4	20492.9	20303.1	21818.7	20250.4	19795.7	1.07462	0.991431	0.982248	1.05557	0.979701	0.9577
FGSG_00638	related to hydroxymethylglutaryl-CoA lyase	2124	1920.8	2323.66	2229.03	1930.55	2165.6	1966.4	0.904331	1.094	1.04945	0.908922	1.01959	0.9258
FGSG_00639	probable alpha-tubulin B	28639	30943.8	26435.8	29632.7	30661.6	26997.8	22177.5	1.08048	0.923069	1.0347	1.07062	0.942695	0.774383
FGSG_00640	conserved hypothetical protein	931	1108.85	904.26	1047.46	1022.05	924.45	823.76	1.19103	0.971278	1.12509	1.0978	0.992965	0.884812
FGSG_00641	related to RNQ1 - prion, epigenetic modifier of protein function	7077	6178.47	8037.74	7333.24	6460.39	7235.27	7910.29	0.873035	1.13576	1.03621	0.912871	1.02236	1.11775
FGSG_00642	related to spore coat protein SP96 precursor	2484	4424.3	4596.47	3032.66	4227.01	2817.84	5102.01	1.78112	1.85043	1.22088	1.70169	1.1344	2.05395
FGSG_00643	related to PBP1 - Pab1p interacting protein	21818	19979.5	23568.2	23476.9	20880.4	22727.3	28040.5	0.915736	1.08022	1.07603	0.957027	1.04168	1.2852
FGSG_00644	probable ubiquinol-cytochrome c reductase complex core protein 2 precursor	8736	7814.48	9624.07	7782.3	8015.84	7793.18	8522.67	0.894515	1.10166	0.890831	0.917564	0.892076	0.97558
FGSG_00645	related to DNA-directed RNA polymerase III chain RPC82	9456	8163.9	8446.76	9872.14	8349.64	9514.07	7184.36	0.863357	0.89327	1.04401	0.882999	1.00614	0.759767
FGSG_00646	probable YHM1 (mitochondrial carrier)	2023	2607.52	2300.45	2896.52	2856.24	2080.7	2389.15	1.28894	1.13715	1.43179	1.41188	1.02852	1.18099
FGSG_00648	conserved hypothetical protein	565	780.64	584.78	589.26	713.49	568.69	533.87	1.38166	1.03501	1.04294	1.26281	1.00653	0.944903
FGSG_00649	related to ribosomal protein S5 (mitochondrial)	4325	3512.37	4125.55	4045.58	3669.53	3961.95	3662.24	0.812109	0.953884	0.935394	0.848446	0.916058	0.846761
FGSG_00652	conserved hypothetical protein	1858	1760.23	3142.8	3842.38	2289.58	1668.33	4651.48	0.947379	1.6915	2.06802	1.23228	0.897917	2.50349
FGSG_00653	conserved hypothetical protein	1201	1656.21	1356.39	1363.43	1654.1	1269.44	1427.69	1.37903	1.12938	1.13525	1.37727	1.05699	1.18875
FGSG_00654	related to NFU-1 protein (iron homeostasis)	8811	7999.29	6850.49	10459.4	7832.3	8590.96	5368.95	0.907875	0.777493	1.18708	0.888923	0.975027	0.609346
FGSG_00655	probable L-arabinitol 4-dehydrogenase	2818	2799.4	3677.84	3184.04	2857.39	2819.18	4101.9	0.9934	1.30512	1.12989	1.01398	1.00042	1.45561
FGSG_00656	related to F1F0-ATP synthase subunit G	4686	4469.74	4899.36	4413.35	4315.34	4673.48	3949.71	0.95385	1.04553	0.941816	0.920901	0.997328	0.842875
FGSG_00659	probable class I alpha-mannosidase	5582	5369.55	6519.96	5311.47	5531.25	5464.53	8421.21	0.96194	1.16803	0.951535	0.990908	0.978956	1.50864
FGSG_00660	related to cell cycle protein p55cdc	19625	17997.1	16037.9	20663.7	17963.4	20288.1	15441.3	0.917051	0.817218	1.05293	0.915331	1.03379	0.786818
FGSG_00661	conserved hypothetical protein	6198	6953.05	6207.11	6466.62	7092.43	6813.47	7392.11	1.12182	1.00147	1.04334	1.14431	1.0993	1.19266
FGSG_00663	conserved hypothetical protein	3046	3192.24	2769.16	3239.91	3177.43	2921.6	2523.22	1.04801	0.909114	1.06366	1.04315	0.95916	0.828372
FGSG_00664	related to KEL2 - involved in cell fusion and morphogenesis	2516	2423.72	2441.94	2475.91	2497.21	2689.81	2454.38	0.963323	0.970564	0.984066	0.992532	1.06908	0.975509
FGSG_00665	related to A.brasilense nifR3 protein	4084	4143.55	3601.56	4062.85	4150.16	4786.68	3795.1	1.01458	0.881871	0.994821	1.0162	1.17206	0.929261
FGSG_00666	related to peroxisomal membrane protein pex13	5053	5164.54	5523.94	5359.22	5062.09	5169.4	5481.28	1.02207	1.0932	1.0606	1.0018	1.02304	1.08476
FGSG_00667	related to chromatin assembly complex, subunit p60	7422	6328.94	6676.93	6671.85	6447.77	7138.25	6737.45	0.852727	0.899613	0.898929	0.868738	0.961769	0.907767
FGSG_00669	related to multidrug transporter (yeast bile transporter)	6451	10562.4	9964.55	7747.75	10171.2	6878.16	13379.5	1.63732	1.54465	1.20102	1.57669	1.06622	2.07402
FGSG_00670	conserved hypothetical protein	1616	1530.98	1598.48	1602.18	1593.3	1606.34	1431.32	0.947389	0.989158	0.991448	0.985953	0.994022	0.885718
FGSG_00671	probable 40s ribosomal protein s11.e, cytosolic	14940	12266	14394.1	11648	12784.3	12375	8897.11	0.82102	0.96346	0.779655	0.855707	0.828315	0.595523
FGSG_00672	related to spindle pole body protein	4221	3290.2	3587.19	4167.49	3378.17	4377.01	2941.14	0.779484	0.849844	0.987323	0.800325	1.03696	0.696787
FGSG_00674	conserved hypothetical protein	62	168.65	102.81	79.25	167.47	152.28	235.53	2.72016	1.65823	1.27823	2.70113	2.45613	3.79887
FGSG_00675	conserved hypothetical protein	2228	2377.27	2099.25	2357.04	2470.82	2452.64	1919.29	1.067	0.942213	1.05792	1.10899	1.10083	0.861441
FGSG_00677	probable protein kinase ck2 catalytic subunit ck2 alpha-3	10531	9073.8	9638.44	9843.69	8993.15	10257.9	7673.55	0.861628	0.915245	0.934735	0.853969	0.974071	0.728663
FGSG_00678	conserved hypothetical protein	3151	2555	2743.73	3061.1	2606.18	3150.69	2116.17	0.810854	0.870749	0.971469	0.827096	0.999902	0.671587
FGSG_00680	related to TOB3 (member of AAA-ATPase family)	35005	34336	50293.7	38044.9	36541.6	33975.7	50843.7	0.980889	1.43676	1.08684	1.0439	0.970596	1.45247
FGSG_00681	conserved hypothetical protein	2280	1828.9	3790.6	1210.02	2013.14	2208.72	754.91	0.802149	1.66254	0.530711	0.882956	0.968737	0.331101
FGSG_00682	conserved hypothetical protein	2351	2023.81	2470.69	2328.59	2177.17	2391.99	2247.83	0.860829	1.05091	0.990468	0.926061	1.01744	0.956117
FGSG_00683	conserved hypothetical protein	2167	3065	1977.65	2105.08	3167.1	2126.52	1757.44	1.4144	0.912621	0.971426	1.46151	0.98132	0.811001
FGSG_00684	probable tetrahydrofolylpolyglutamate synthase (met6+)	821	672.58	717.44	728.45	627.46	691.32	571.32	0.81922	0.873861	0.887272	0.764263	0.842046	0.695883
FGSG_00685	related to folylpolyglutamate synthetase	424	546.35	504.09	463.28	593.04	384.07	471.07	1.28856	1.18889	1.09264	1.39868	0.905825	1.11101
FGSG_00686	related to mysoin heavy chain proteins	7433	7576.14	8235.62	6978.67	7890.8	7097.82	6702.43	1.01926	1.10798	0.938877	1.06159	0.954906	0.901713
FGSG_00687	hypothetical protein	2003	2710.53	2165.58	2562.27	2765.62	2220.85	1999.01	1.35324	1.08117	1.27922	1.38074	1.10876	0.998008
FGSG_00688	related to SAC1 protein	10525	9237.4	9504.68	10970.4	9349.9	10554.4	9505.87	0.877663	0.903057	1.04232	0.888352	1.0028	0.903171
FGSG_00689	conserved hypothetical protein	6544	4505.09	5780.41	7154.43	4537.87	7112.64	8743.71	0.688431	0.883314	1.09328	0.69344	1.08689	1.33614
FGSG_00690	related to isoleucine tRNA ligase	3119	3065	3072.05	3221.63	3123.52	3335.31	4077.74	0.982687	0.984947	1.0329	1.00145	1.06935	1.30739
FGSG_00691	conserved hypothetical protein	1163	1096.73	1108.77	1291.29	1010.58	1273.48	1835.95	0.943018	0.953371	1.11031	0.868942	1.095	1.57863
FGSG_00692	hypothetical protein	244	331.24	201.19	304.79	337.24	322.08	266.94	1.35754	0.824549	1.24914	1.38213	1.32	1.09402
FGSG_00693	conserved hypothetical protein	1873	1778.4	1877.06	1844.99	1691.95	1765.36	2018.34	0.949493	1.00217	0.985045	0.903337	0.942531	1.0776
FGSG_00694	related to cell division control protein CDC91	2296	2945.83	2623.24	2538.9	2954.89	2358.3	3037.77	1.28303	1.14253	1.10579	1.28697	1.02713	1.32307
FGSG_00695	related to pescadillo development protein	3564	3953.69	4380.91	3691	4256.84	3548.24	3888.11	1.10934	1.22921	1.03563	1.1944	0.995578	1.09094
FGSG_00696	conserved hypothetical protein	4343	4068.82	3193.65	4712.05	4072.16	4499.64	2436.26	0.936869	0.735356	1.08498	0.937638	1.03607	0.560962
FGSG_00698	conserved hypothetical protein	2264	2632.77	2543.65	2510.45	2708.27	2351.57	2668.17	1.16288	1.12352	1.10886	1.19623	1.03868	1.17852
FGSG_00700	related to human G protein-coupled receptor	3269	5231.2	4227.25	3750.95	5199.74	4224.73	5395.52	1.60024	1.29313	1.14743	1.59062	1.29236	1.65051
FGSG_00701	conserved hypothetical protein	2175	2273.25	2215.33	2207.69	2389.38	2623.78	2506.31	1.04517	1.01854	1.01503	1.09857	1.20634	1.15233
FGSG_00702	conserved hypothetical protein	8794	19311	17822.1	10282.6	21800.4	9554.5	25177.9	2.19593	2.02662	1.16927	2.47901	1.08648	2.86307
FGSG_00703	conserved hypothetical protein	4756	5122.13	5464.25	4833.96	4884.29	4995.56	7185.57	1.07698	1.14892	1.01639	1.02697	1.05037	1.51084
FGSG_00704	related to enoyl-CoA hydratase	4992	4644.45	5444.35	5202.76	4415.13	5095.28	5970.46	0.930379	1.09061	1.04222	0.884441	1.02069	1.19601
FGSG_00705	conserved hypothetical protein	3716	4948.43	3790.6	3655.44	4683.55	3401.35	4849.57	1.33166	1.02008	0.983703	1.26037	0.915326	1.30505
FGSG_00706	probable D-lactate dehydrogenase (cytochrome)	4862	7077.26	4726.91	5049.35	6802.22	4515.81	6844.95	1.45563	0.972215	1.03853	1.39906	0.928797	1.40785
FGSG_00707	conserved hypothetical protein	7550	4981.75	5602.43	7043.69	4787.94	6932.06	4600.75	0.659834	0.742044	0.932939	0.634164	0.918154	0.609371
FGSG_00709	conserved hypothetical protein	21172	31737.6	25319.3	22958.8	32011.7	24294.6	21779	1.49904	1.19589	1.08439	1.51198	1.14749	1.02867
FGSG_00710	probable zinc finger protein white collar 2 (wc-2)	10276	12600.3	11267.9	10809.9	12427.5	10181.1	11965.1	1.22619	1.09652	1.05195	1.20937	0.990768	1.16437
FGSG_00712	related to flavin-containing monooxygenase	406	400.92	559.36	404.35	412.95	564.65	536.29	0.987488	1.37773	0.995936	1.01712	1.39076	1.32091
FGSG_00713	related to STB5 - SIN3 binding protein	1365	1067.45	1683.6	1241.51	1180.35	1662.94	1509.83	0.782015	1.23341	0.909531	0.864725	1.21827	1.1061
FGSG_00714	conserved hypothetical protein	6871	9047.54	8569.47	7714.23	9169.81	7232.58	12000.1	1.31677	1.24719	1.12272	1.33457	1.05262	1.74649
FGSG_00715	conserved hypothetical protein	4712	4318.26	4055.9	4689.7	4364.66	4531.98	3208.08	0.916439	0.86076	0.995267	0.926286	0.961795	0.680832
FGSG_00716	related to SIN3 protein-binding protein STB2	2435	2804.45	2339.14	2511.47	2895.25	2487.67	2705.61	1.15172	0.960632	1.0314	1.18901	1.02163	1.11113
FGSG_00717	probable mitochondrial import inner membrane translocase subunit TIM10	2850	3091.25	3007.94	2841.66	3063.87	3042.88	2557.04	1.08465	1.05542	0.997074	1.07504	1.06768	0.897207
FGSG_00718	related to aldehyde dehydrogenase	3791	1636.01	2919.5	2459.65	1580.68	3270.63	1767.1	0.431551	0.770113	0.648813	0.416956	0.862735	0.46613
FGSG_00719	related to zinc finger transcription factor	8669	8874.85	9144.3	9305.23	9390.05	8659.69	11886.6	1.02375	1.05483	1.07339	1.08318	0.998926	1.37116
FGSG_00720	conserved hypothetical protein	2867	1073.51	3507.6	3036.72	1243.44	3449.86	2937.52	0.374437	1.22344	1.0592	0.433708	1.2033	1.0246
FGSG_00721	probable glycosyl hydrolase	2056	1810.72	2170	1825.69	1734.39	1974.24	2317.89	0.8807	1.05545	0.887982	0.843575	0.960233	1.12738
FGSG_00722	probable APT1 - adenine phosphoribosyltransferase	6426	9551.48	11141.9	7641.08	9819.06	8485.85	14190	1.48638	1.73387	1.18909	1.52802	1.32055	2.20821
FGSG_00723	conserved hypothetical protein	2214	2664.07	2661.93	2330.63	2890.66	2324.61	2455.58	1.20328	1.20232	1.05268	1.30563	1.04996	1.10911
FGSG_00724	probable peroxisome assembly protein	3456	2336.87	2857.59	3155.59	2467.38	3158.78	2152.41	0.676178	0.826849	0.913076	0.713941	0.913999	0.622804
FGSG_00725	conserved hypothetical protein	2783	1827.89	3180.39	3389.26	1994.78	2762.58	3526.96	0.656806	1.14279	1.21784	0.716773	0.992663	1.26732
FGSG_00726	conserved hypothetical protein	6779	7346.9	6202.69	7179.83	7171.58	7529.05	5518.72	1.08377	0.914986	1.05913	1.05791	1.11064	0.814091
FGSG_00728	related to Het-c protein	23789	23394	23592.6	21116.8	23081.7	23734	27117.7	0.983394	0.991742	0.887673	0.970267	0.997686	1.13993
FGSG_00729	related to nonhistone chromosomal protein	7494	5569.51	6523.27	6091.73	5796.23	7929.29	5422.09	0.743196	0.870466	0.812881	0.773449	1.05809	0.723524
FGSG_00730	probable glomerulosclerosis protein Mpv17	1988	1462.31	1587.43	1783.02	1382.24	1932.46	1142.64	0.735568	0.798506	0.896891	0.695292	0.972062	0.574769
FGSG_00731	conserved hypothetical protein	4679	5168.58	5264.16	4844.12	5009.32	4619.58	5085.1	1.10463	1.12506	1.03529	1.0706	0.987301	1.08679
FGSG_00732	related to A.ambisexualis antheridiol steroid receptor	3173	3453.8	3530.81	3475.62	3637.41	3286.8	3507.63	1.0885	1.11277	1.09537	1.14636	1.03587	1.10546
FGSG_00734	conserved hypothetical protein	247	345.38	254.25	277.36	273.01	268.17	309.21	1.3983	1.02935	1.12291	1.1053	1.08571	1.25186
FGSG_00736	conserved hypothetical protein	2073	2128.83	2116.94	2385.49	2217.32	2249.15	3008.78	1.02693	1.0212	1.15074	1.06962	1.08497	1.45141
FGSG_00737	related to histidine kinase	5088	3798.17	4998.85	4960.96	3835.86	4921.44	6245.85	0.746496	0.982478	0.975031	0.753903	0.967264	1.22756
FGSG_00738	conserved hypothetical protein	8992	7216.63	7178.81	8850.08	6981.17	8937.29	6173.38	0.802561	0.798355	0.984217	0.776376	0.993916	0.686541
FGSG_00739	probable NADPH oxidase heavy chain subunit	1093	1945.04	1574.16	1228.3	1917.93	1136.03	2229.71	1.77954	1.44022	1.12379	1.75474	1.03937	2.03999
FGSG_00740	probable urease	2271	3223.55	5638.91	2677.07	3682.15	4162.74	5098.39	1.41944	2.48301	1.17881	1.62138	1.833	2.245
FGSG_00741	related to NGG1 - general transcriptional adaptor or co-activator	6521	6928.81	6359.67	6821.19	6893.99	7398.33	6291.75	1.06254	0.97526	1.04603	1.0572	1.13454	0.964844
FGSG_00742	related to S-adenosylmethionine:diacylglycerol 3-amino-3-carboxypropyl transferase	285	264.59	203.4	337.3	294.8	230.44	202.92	0.928386	0.713684	1.18351	1.03439	0.808561	0.712
FGSG_00743	related to succinate dehydrogenase precursor	6101	5643.23	6756.52	6007.4	5489.95	6149.11	6387.17	0.924968	1.10744	0.984658	0.899844	1.00789	1.04691
FGSG_00744	probable tyrosine--trna ligase precursor, mitochondrial	2783	2337.88	2498.32	2905.66	2561.44	2408.16	2200.72	0.840057	0.897708	1.04407	0.920388	0.865311	0.790773
FGSG_00745	related to nitrogen permease regulator	3213	2158.12	2196.53	3052.98	2139.32	3227.51	1697.05	0.671684	0.683638	0.950196	0.665833	1.00452	0.528182
FGSG_00746	related to ubiquitin-like protein DSK2	13719	13672.8	12871.9	13918.7	13544.8	12985.5	12397.5	0.996633	0.938252	1.01456	0.987302	0.946533	0.903673
FGSG_00747	related to quinone reductase	3738	3124.58	4251.57	3765.17	3122.37	3812.37	2617.44	0.835896	1.13739	1.00727	0.835305	1.0199	0.700225
FGSG_00748	related to nuclear transport factor	9921	7519.59	8751.86	9447.46	7365.44	9984.38	6797.85	0.757947	0.882155	0.952269	0.742409	1.00639	0.685198
FGSG_00749	related to threonine--tRNA ligase	1497	1321.94	1344.23	1343.11	1234.26	1398.81	1169.21	0.883059	0.897949	0.897201	0.824489	0.934409	0.781035
FGSG_00750	conserved hypothetical protein	25593	23389.9	20118.1	27773.5	24235.6	27010	12791.3	0.913918	0.786079	1.0852	0.946963	1.05537	0.499795
FGSG_00751	related to septum formation maf	2295	1938.98	2111.41	2109.14	2014.28	2257.23	1634.24	0.844871	0.920004	0.919015	0.877682	0.983542	0.712087
FGSG_00752	conserved hypothetical protein	3756	3175.07	3407	3794.63	3257.72	3767.89	3351.82	0.845333	0.907082	1.01028	0.867338	1.00317	0.892391
FGSG_00756	conserved hypothetical protein	5815	8599.16	6857.12	7064.01	7851.8	5964.49	7337.76	1.47879	1.17921	1.21479	1.35027	1.02571	1.26187
FGSG_00757	probable small nuclear ribonucleoprotein	806	844.26	784.87	712.19	887.84	820.69	665.53	1.04747	0.973784	0.88361	1.10154	1.01823	0.82572
FGSG_00758	conserved hypothetical protein	1411	1468.37	1550.95	1384.76	1550.86	1398.81	1616.12	1.04066	1.09918	0.981403	1.09912	0.991361	1.14537
FGSG_00759	related to monooxygenase	1104	969.49	1167.36	966.18	1055.32	981.05	1088.28	0.878161	1.05739	0.875163	0.955906	0.888632	0.985761
FGSG_00760	related to single-stranded DNA binding protein	655	425.16	551.62	475.47	409.51	563.3	440.87	0.649099	0.842168	0.725908	0.625206	0.86	0.673084
FGSG_00761	conserved hypothetical protein	1090	1014.93	1169.57	1194.78	1058.76	998.57	1218.73	0.931128	1.073	1.09613	0.971339	0.916119	1.1181
FGSG_00762	related to putative glutathione S-transferase	2918	1678.43	2220.85	2316.4	1771.1	2317.87	1036.35	0.575199	0.761086	0.793831	0.606957	0.794335	0.355158
FGSG_00763	conserved hypothetical protein	124	184.81	118.28	168.65	142.24	157.67	159.44	1.4904	0.953871	1.36008	1.1471	1.27153	1.28581
FGSG_00764	conserved hypothetical protein	41	73.72	42.01	67.05	86.03	39.08	49.52	1.79805	1.02463	1.63537	2.09829	0.953171	1.2078
FGSG_00765	probable flavohemoglobin	1161	715	1449.25	1014.95	820.17	1235.75	1699.46	0.615848	1.24828	0.874203	0.706434	1.06438	1.46379
FGSG_00766	related to stress-induced protein STI1	9359	8482.01	7996.84	8720.03	8639.85	8801.19	7508.07	0.906294	0.854455	0.931727	0.92316	0.940399	0.80223
FGSG_00767	related to beta-glucosidase	3086	3547.72	3708.79	3082.44	3241.67	2851.53	4345.89	1.14962	1.20181	0.998846	1.05044	0.924021	1.40826
FGSG_00768	related to low affininty zinc transporter	3190	2482.29	3253.35	2543.98	2624.53	2944.51	2616.23	0.778147	1.01986	0.797486	0.822737	0.923044	0.820135
FGSG_00769	conserved hypothetical protein	8957	13796	11828.3	9055.3	14854.8	9377.96	9749.86	1.54025	1.32057	1.01097	1.65845	1.047	1.08852
FGSG_00770	hypothetical protein	221	713.99	286.31	278.37	660.72	300.52	374.44	3.23072	1.29552	1.25959	2.98968	1.35982	1.6943
FGSG_00771	conserved hypothetical protein	3780	7363.06	5158.04	3267.35	6977.72	4011.81	6586.47	1.9479	1.36456	0.864378	1.84596	1.06133	1.74245
FGSG_00772	hypothetical protein	606	1448.17	445.5	718.29	1467.12	490.53	757.33	2.38972	0.735149	1.1853	2.42099	0.809455	1.24972
FGSG_00773	related to copper transport protein	1234	550.39	965.06	775.18	529.95	1040.35	268.15	0.446021	0.782058	0.628185	0.429457	0.843071	0.217301
FGSG_00774	related to C6 zink-finger protein PRO1A	2199	1236.1	1703.5	1940.49	1292.77	2262.62	1315.36	0.562119	0.77467	0.882442	0.58789	1.02893	0.598163
FGSG_00776	related to cytoskeletal adaptor	5700	4888.85	6055.67	5500.44	4855.62	5546.73	5348.41	0.857693	1.0624	0.964989	0.851863	0.973111	0.938318
FGSG_00777	probable peptidylprolyl isomerase precursor, mitochondrial (cyclophilin B)	32069	29258.3	29322.1	25534.3	29343.6	29232.2	24497.9	0.912356	0.914345	0.796229	0.915015	0.91154	0.763911
FGSG_00778	related to RPC34 - DNA-directed RNA polymerase III, 34 KD subunit	4746	4236.46	3872.4	5020.9	4464.46	4672.14	2740.64	0.892638	0.815929	1.05792	0.940678	0.984437	0.577463
FGSG_00779	hypothetical protein	73	218.13	55.27	137.16	208.77	53.9	114.75	2.98808	0.757123	1.8789	2.85986	0.738356	1.57192
FGSG_00780	probable histone deacetylase RpdA	6201	5365.51	6329.82	5828.59	5616.13	6287.91	5901.61	0.865265	1.02077	0.939944	0.905681	1.01402	0.951719
FGSG_00781	probable multidrug resistance protein	10818	11162.2	10540.5	10728.6	10820.5	10854.9	9145.93	1.03182	0.974347	0.991736	1.00023	1.00341	0.845436
FGSG_00782	conserved hypothetical protein	477	659.45	526.2	506.97	638.93	540.39	530.25	1.38249	1.10314	1.06283	1.33948	1.13289	1.11164
FGSG_00783	related to acetylxylan esterase precursor	204	457.48	264.2	288.53	435.89	328.81	432.41	2.24255	1.2951	1.41436	2.13672	1.61181	2.11966
FGSG_00784	hypothetical protein	159	177.74	117.18	122.93	164.03	126.67	115.95	1.11786	0.736981	0.773145	1.03164	0.796667	0.729245
FGSG_00785	conserved hypothetical protein	349	553.42	406.81	477.5	516.19	350.38	487.98	1.58573	1.16564	1.36819	1.47905	1.00395	1.39822
FGSG_00786	related to serine/threonine-protein kinase	9403	10504.8	9284.69	9098.99	10289.4	9507.33	10513.2	1.11718	0.987418	0.967669	1.09426	1.0111	1.11807
FGSG_00787	related to allantoate permease	11635	11230.9	10332.7	11707	11070.5	11462.7	9406.83	0.965269	0.888067	1.00619	0.951485	0.985191	0.808494
FGSG_00788	conserved hypothetical protein	899	1011.9	690.91	795.5	1016.32	921.76	913.14	1.12558	0.768532	0.884872	1.1305	1.02532	1.01573
FGSG_00789	conserved hypothetical protein	836	706.92	878.83	807.69	699.72	819.34	758.54	0.845598	1.05123	0.966136	0.836986	0.980072	0.907344
FGSG_00792	related to protein kinase	1958	2123.78	2188.8	2156.9	2120.96	1982.32	2599.32	1.08467	1.11788	1.10158	1.08323	1.01242	1.32754
FGSG_00793	conserved hypothetical protein	713	741.25	676.54	625.83	788.05	733.1	387.72	1.03962	0.948864	0.877742	1.10526	1.02819	0.543787
FGSG_00794	related to cactin	2635	1960.18	2271.7	2645.57	2016.58	2712.72	1720	0.743901	0.862125	1.00401	0.765306	1.0295	0.652751
FGSG_00796	conserved hypothetical protein	1216	1577.44	1208.26	1224.24	1617.39	1202.06	1006.15	1.29724	0.993635	1.00678	1.33009	0.988536	0.827426
FGSG_00797	probable deoxyribodipyrimidine photo-lyase PHR	2467	2655.99	2158.95	2538.9	2725.48	2568.53	1979.69	1.07661	0.875132	1.02914	1.10478	1.04116	0.802469
FGSG_00798	probable 40s ribosomal protein s21 (CRP-7)	15618	11897.4	14663.8	12159.1	12185.5	14136.3	9380.26	0.761777	0.938905	0.77853	0.780221	0.905131	0.600606
FGSG_00799	conserved hypothetical protein	4119	2953.91	3587.19	3537.59	3097.13	3821.8	3646.54	0.717143	0.870889	0.858847	0.751913	0.927847	0.885297
FGSG_00800	conserved hypothetical protein	6744	6367.31	7300.41	7224.53	6104.79	7166.55	7215.77	0.944144	1.0825	1.07125	0.905218	1.06266	1.06995
FGSG_00801	conserved hypothetical protein	477	395.87	595.84	526.27	422.13	433.93	402.22	0.829916	1.24914	1.10329	0.884969	0.909706	0.843229
FGSG_00802	probable ribosomal protein L23.e, cytosolic	12282	9251.54	11334.2	9673.01	9761.7	11297	6757.99	0.75326	0.92283	0.787576	0.794797	0.919797	0.550235
FGSG_00804	related to D.melanogaster troponin T and human nucleolin	4881	4796.95	5269.69	4559.65	4843	5000.95	5745.8	0.98278	1.07963	0.934163	0.992215	1.02457	1.17718
FGSG_00806	probable endopeptidase K	7810	3548.73	13191.4	9962.56	3196.93	13485.5	12966.4	0.454383	1.68903	1.27562	0.409338	1.72669	1.66023
FGSG_00807	related to beta-mannosidase	9039	10015	9321.17	8504.65	9580.46	8298.53	9619.41	1.10798	1.03122	0.940884	1.0599	0.918081	1.06421
FGSG_00808	related to GTP-binding protein rab4b	3459	3597.2	3359.47	3483.75	3586.94	3806.97	3069.18	1.03995	0.971226	1.00716	1.03699	1.1006	0.887303
FGSG_00810	related to formate dehydrogenase	1435	912.93	1143.04	1628.59	911.93	1335.47	981.99	0.636188	0.796544	1.13491	0.635491	0.930641	0.684314
FGSG_00811	related to aquaporin	20034	26969.9	22492.6	19109.3	24945.7	20285.5	29302.7	1.34621	1.12272	0.953843	1.24517	1.01255	1.46265
FGSG_00812	conserved hypothetical protein	1678	3027.63	2186.58	1840.93	3065.01	1689.89	3411	1.80431	1.30309	1.0971	1.82659	1.00709	2.03278
FGSG_00813	related to pathway-specific regulatory protein nit-4	3149	2466.14	2653.09	2914.81	2531.62	2812.44	3193.59	0.78315	0.842518	0.92563	0.803944	0.893122	1.01416
FGSG_00814	conserved hypothetical protein	765	761.45	1053.5	908.27	785.75	727.7	711.43	0.995359	1.37712	1.18728	1.02712	0.951242	0.929974
FGSG_00815	probable MXR1 - responsible for the reduction of methionine sulfoxide	1652	1993.51	1713.45	1704.79	2014.28	1836.78	2065.44	1.20673	1.0372	1.03196	1.2193	1.11185	1.25027
FGSG_00817	conserved hypothetical protein	3154	2787.28	2695.09	3872.86	2727.77	2688.47	3390.47	0.883729	0.854499	1.22792	0.86486	0.8524	1.07497
FGSG_00818	probable vacuolar ATP synthase 98 kDa subunit	13886	13496.1	13601.5	13530.6	13293.6	13536.7	13993.1	0.97192	0.97951	0.974408	0.957337	0.974842	1.00771
FGSG_00819	related to BRR5 - component of pre-mRNA polyadenylation factor PF I	8093	7743.79	7386.63	8376.64	7771.51	8935.95	6453.61	0.95685	0.912718	1.03505	0.960276	1.10416	0.797431
FGSG_00820	related to tpa inducible protein	7132	6921.74	6728.89	6858.78	7242.7	7374.08	6738.66	0.970519	0.943479	0.961691	1.01552	1.03394	0.944849
FGSG_00821	probable nitrilase	1102	969.49	873.31	1150.07	986.49	1067.3	593.06	0.879755	0.792477	1.04362	0.895181	0.968512	0.538167
FGSG_00822	related to subunit of the Arp2/3 complex ARC15	3400	3461.88	3559.56	3110.89	3593.82	3292.19	3162.18	1.0182	1.04693	0.914968	1.05701	0.968291	0.930053
FGSG_00823	conserved hypothetical protein	2113	1982.4	2056.14	1996.37	1907.6	2026.79	1616.12	0.938192	0.97309	0.944804	0.902792	0.9592	0.764846
FGSG_00824	related to alpha-adaptin C	5279	5722	6209.32	5308.42	5782.46	5310.9	7181.95	1.08392	1.17623	1.00557	1.09537	1.00604	1.36048
FGSG_00825	conserved hypothetical protein	1213	1372.43	1355.28	1078.96	1337.5	1087.51	1306.91	1.13143	1.1173	0.889497	1.10264	0.896546	1.07742
FGSG_00826	conserved hypothetical protein	923	959.39	1084.45	929.61	1020.91	940.63	1099.15	1.03943	1.17492	1.00716	1.10608	1.0191	1.19085
FGSG_00828	related to 7alpha-cephem-methoxylase P8 chain	988	2198.52	1793.04	1413.21	2543.09	1270.79	1886.68	2.22522	1.81482	1.43037	2.57398	1.28622	1.9096
FGSG_00829	related to ars binding protein 2	1935	2143.98	2310.39	2372.28	2064.75	1871.82	2445.92	1.108	1.194	1.22598	1.06705	0.967349	1.26404
FGSG_00831	conserved hypothetical protein	37973	34755.1	31777.3	43924.3	34110.9	36210.1	27347.2	0.915259	0.83684	1.15672	0.898294	0.953574	0.720175
FGSG_00832	conserved hypothetical protein	871	912.93	944.06	842.24	932.58	956.8	861.21	1.04814	1.08388	0.96698	1.0707	1.09851	0.98876
FGSG_00833	related to E.histolytica surface lectin	11144	9747.39	10305	11763.9	10039.3	11629.8	8988.91	0.874676	0.924715	1.05562	0.90087	1.04359	0.806614
FGSG_00834	probable 35 kDa ribonuclease H	887	973.53	843.46	944.85	996.82	955.45	729.55	1.09755	0.950913	1.06522	1.12381	1.07717	0.822492
FGSG_00836	related to mitochondrial rRNA processing protein PRP12	5415	4533.37	4406.33	4840.06	4305.01	5084.5	3525.75	0.837187	0.813727	0.893825	0.795016	0.938966	0.651108
FGSG_00837	conserved hypothetical protein	1303	1412.83	1409.45	1359.36	1397.15	1304.48	1235.64	1.08429	1.0817	1.04325	1.07226	1.00114	0.948304
FGSG_00838	probable heat shock protein 70 (hsp70)	114157	128838	111483	107592	123472	110619	124802	1.1286	0.976573	0.942489	1.0816	0.96901	1.09325
FGSG_00840	probable carnitine acetyl transferase FacC	1490	1635	1869.32	1638.75	1776.84	1618.47	2073.9	1.09732	1.25458	1.09983	1.19251	1.08622	1.39188
FGSG_00841	related to Drosophila pumilio protein and Mpt5p protein	15414	11940.9	12881.8	14592.3	12154.5	14400.5	15823	0.774676	0.835723	0.946692	0.788538	0.934246	1.02653
FGSG_00842	conserved hypothetical protein	4127	2455.03	3248.92	4038.46	2560.3	4475.39	4908.75	0.59487	0.787235	0.978546	0.620378	1.08442	1.18942
FGSG_00843	probable DNA-directed RNA polymerase III second-largest chain	5401	5046.39	4924.79	5562.41	5144.68	5286.64	4564.51	0.934344	0.911829	1.02989	0.952542	0.978826	0.845123
FGSG_00844	related to RAD57 protein	2718	2524.71	1953.33	2938.17	2535.06	2797.62	1489.29	0.928885	0.718664	1.081	0.932693	1.02929	0.547936
FGSG_00845	probable ribosomal protein L15.e.B, cytosolic	19414	13139.6	17758	14682.7	13623.9	16708.9	10007.1	0.67681	0.9147	0.756296	0.701759	0.860663	0.51546
FGSG_00846	related to suppressor protein PSP1	11904	8895.05	9347.7	9676.06	8630.68	10376.5	9607.33	0.747232	0.785257	0.812841	0.725024	0.871684	0.807067
FGSG_00847	conserved hypothetical protein	27781	114599	52301.2	34935	107142	30265.8	64659.3	4.12507	1.88262	1.25751	3.85668	1.08944	2.32746
FGSG_00848	related to WD repeat protein WDR6	1189	2053.09	1468.04	1410.16	2050.99	1216.88	1381.79	1.72674	1.23468	1.18601	1.72497	1.02345	1.16214
FGSG_00849	conserved hypothetical protein	12819	12142.8	14112.2	13245.1	12119	13043.4	14971.5	0.947253	1.10088	1.03324	0.94539	1.01751	1.16791
FGSG_00850	related to hsp70 protein	489	693.79	354.85	646.15	720.37	435.28	504.89	1.41879	0.725665	1.32137	1.47315	0.890143	1.03249
FGSG_00851	conserved hypothetical protein	454	699.85	331.64	530.33	719.22	462.23	390.14	1.54152	0.730485	1.16813	1.58419	1.01813	0.859339
FGSG_00852	probable serine/threonine protein phosphatase-z-like	8803	7260.05	7915.04	8996.38	7306.94	8508.76	6713.3	0.824725	0.89913	1.02197	0.830051	0.966575	0.762615
FGSG_00853	conserved hypothetical protein	4472	3382.1	3812.7	4100.44	3405.7	4240.9	3233.45	0.756284	0.852572	0.916914	0.761561	0.948323	0.723043
FGSG_00855	conserved hypothetical protein	2770	4641.42	4671.64	3531.5	4615.87	3052.32	6162.51	1.6756	1.68651	1.27491	1.66638	1.10192	2.22473
FGSG_00856	related to sensory transduction histidine kinase	6395	4623.25	6298.87	6221.77	4864.79	6211.1	7636.1	0.722948	0.984968	0.972912	0.760718	0.971243	1.19407
FGSG_00857	conserved hypothetical protein	28072	25405.6	28192.3	26917	24606.1	26409	36886.9	0.905017	1.00429	0.958855	0.876537	0.940758	1.31401
FGSG_00858	conserved hypothetical protein	12496	10800.7	8488.77	12545.1	11305.7	11997.7	12782.8	0.864333	0.679319	1.00393	0.904744	0.960123	1.02295
FGSG_00859	conserved hypothetical protein	1410	1464.33	1461.41	1477.21	1477.45	1322	1323.82	1.03853	1.03646	1.04767	1.04784	0.937589	0.938879
FGSG_00860	conserved hypothetical protein	3371	3436.63	4241.62	2502.32	3426.35	3238.29	3779.4	1.01947	1.25827	0.742308	1.01642	0.960632	1.12115
FGSG_00861	probable IMP dehydrogenase	17784	15225	16979.7	17041.8	15790.8	16409.8	16423.3	0.856107	0.954776	0.958266	0.887921	0.922725	0.923487
FGSG_00862	related to seed imbibition protein Sip1	2063	2450.99	2477.32	2162.99	2429.53	2059.14	3002.74	1.18807	1.20083	1.04847	1.17767	0.998129	1.45552
FGSG_00863	probable mitochondrial processing peptidase beta chain precursor	13004	11039	13418	11209.1	11199	12007.1	11031.4	0.848895	1.03183	0.861977	0.861197	0.923341	0.848308
FGSG_00864	related to TFIID and SAGA subunit	4262	3914.31	3936.52	4030.34	4107.72	4699.09	2805.86	0.918421	0.923632	0.945645	0.963801	1.10256	0.658344
FGSG_00865	probable histidine biosynthesis trifunctional protein (his-3)	4230	2863.02	3510.92	3353.7	2992.75	3615.62	2673	0.676837	0.830005	0.792837	0.707506	0.854757	0.631915
FGSG_00866	related to SMP2 protein	6850	6606.66	7915.04	6964.44	6645.07	7449.54	7951.35	0.964476	1.15548	1.01671	0.970083	1.08752	1.16078
FGSG_00867	hypothetical protein	246	427.18	294.05	341.36	438.19	270.87	190.84	1.7365	1.19533	1.38764	1.78126	1.1011	0.775772
FGSG_00868	related to NTP pyrophosphohydrolase	1227	1455.24	1256.9	1251.67	1393.71	1237.1	1014.6	1.18601	1.02437	1.02011	1.13587	1.00823	0.826895
FGSG_00869	conserved hypothetical protein	5222	4268.78	5993.76	5299.28	4324.51	5504.95	6360.6	0.817461	1.14779	1.0148	0.828133	1.05418	1.21804
FGSG_00870	related to subunit of VP52-54 complex	2594	2600.45	2918.39	2585.63	2639.44	2614.35	2691.12	1.00249	1.12505	0.996773	1.01752	1.00785	1.03744
FGSG_00871	probable thioredoxin-disulfide reductase CYS-9	2207	2594.39	2454.1	2415.97	2536.21	2100.91	2178.98	1.17553	1.11196	1.09469	1.14917	0.95193	0.987304
FGSG_00872	probable UDP-N-acetylglucosamine pyrophosphorylase	12917	12100.4	13210.1	11524.1	11854	11988.3	13396.4	0.936783	1.02269	0.892165	0.917705	0.928099	1.03711
FGSG_00874	related to actin-like protein	3091	3101.35	3231.24	2828.45	3221.02	2995.72	2659.71	1.00335	1.04537	0.91506	1.04206	0.969175	0.860469
FGSG_00875	related to lysyl-tRNA synthetase	5647	4603.05	5007.7	5679.25	4745.49	5266.43	4749.31	0.815132	0.886789	1.00571	0.840356	0.932607	0.841032
FGSG_00876	conserved hypothetical protein	3609	1878.38	3437.96	3243.98	1800.93	4723.34	4004.06	0.520471	0.952607	0.898858	0.499011	1.30877	1.10947
FGSG_00877	related to ATP-dependent RNA helicase ROK1	1880	1974.32	1961.07	1930.33	2095.73	1816.57	1947.07	1.05017	1.04312	1.02677	1.11475	0.966261	1.03568
FGSG_00878	conserved hypothetical protein	560	629.16	537.25	583.16	548.31	506.7	942.13	1.1235	0.959375	1.04136	0.979125	0.904821	1.68237
FGSG_00880	conserved hypothetical protein	358	425.16	441.08	426.71	455.39	316.69	473.48	1.1876	1.23207	1.19193	1.27204	0.884609	1.32257
FGSG_00882	conserved hypothetical protein	1285	1176.51	1151.88	1415.24	1136.76	1327.39	1094.32	0.915572	0.896405	1.10135	0.884638	1.03299	0.851611
FGSG_00883	conserved hypothetical protein	8496	8811.23	9758.93	8559.51	8700.65	8239.24	10772.9	1.0371	1.14865	1.00748	1.02409	0.969779	1.268
FGSG_00884	probable U-snRNP-associated cyclophilin	1314	1914.74	1397.29	1364.44	1760.78	1176.46	1438.56	1.45718	1.06339	1.03839	1.34002	0.895327	1.09479
FGSG_00885	conserved hypothetical protein	4417	19717	8400.33	5370.39	18338.5	8837.57	13468.9	4.46388	1.90182	1.21585	4.15179	2.00081	3.04933
FGSG_00886	conserved hypothetical protein	3950	4444.5	3718.74	4147.17	4709.94	4226.08	3533	1.12519	0.941453	1.04992	1.19239	1.06989	0.89443
FGSG_00887	conserved hypothetical protein	16094	14112.1	14388.6	16758.3	13845.3	16454.2	12878.2	0.876855	0.894033	1.04128	0.860279	1.02238	0.800188
FGSG_00889	conserved hypothetical protein	2477	9088.95	3529.71	3408.56	8873.86	9221.64	3882.07	3.66934	1.42499	1.37608	3.5825	3.72291	1.56725
FGSG_00890	conserved hypothetical protein	1285	1547.14	1622.8	1431.5	1568.07	1262.7	2207.97	1.204	1.26288	1.11401	1.22029	0.982646	1.71826
FGSG_00891	conserved hypothetical protein	395	346.39	253.15	489.7	316.6	336.9	184.8	0.876937	0.640886	1.23975	0.801519	0.852911	0.467848
FGSG_00892	related to small nucleolar ribonucleoprotein	2466	2896.35	3083.11	2796.95	3063.87	2352.91	3465.36	1.17451	1.25025	1.13421	1.24245	0.95414	1.40526
FGSG_00893	related to flavonol synthase-like protein	2440	2465.13	2941.61	2573.44	2475.41	2999.76	2883.17	1.0103	1.20558	1.05469	1.01451	1.22941	1.18163
FGSG_00894	conserved hypothetical protein	3258	3387.15	3210.23	3287.66	3591.53	3075.23	3295.05	1.03964	0.985338	1.0091	1.10237	0.943901	1.01137
FGSG_00895	related to 6-hydroxy-D-nicotine oxidase	265	199.96	234.36	260.09	189.27	272.22	193.26	0.754566	0.884377	0.981472	0.714226	1.02725	0.729283
FGSG_00896	conserved hypothetical protein	902	634.21	669.9	906.24	602.22	884.03	485.56	0.703115	0.742683	1.0047	0.66765	0.980078	0.538315
FGSG_00897	conserved hypothetical protein	1218	1389.6	1357.5	1352.25	1525.62	1241.14	1418.03	1.14089	1.11453	1.11022	1.25256	1.019	1.16423
FGSG_00898	related to endoplasmic reticulum 25 kDa transmembrane protein	9821	11245	9495.83	8947.61	11402	9503.29	9045.68	1.145	0.96689	0.911069	1.16099	0.96765	0.921055
FGSG_00900	conserved hypothetical protein	24767	21662	18447.8	22221.2	21745.3	23461.8	15149	0.874632	0.744854	0.89721	0.877995	0.947299	0.611661
FGSG_00901	conserved hypothetical protein	835	960.4	789.29	833.09	1031.23	797.78	771.82	1.15018	0.945257	0.997713	1.23501	0.955425	0.924335
FGSG_00902	related to transcription elongation factor TFIIS	4906	5687.66	4752.34	5478.09	5772.14	4840.59	3970.24	1.15933	0.968679	1.11661	1.17655	0.986667	0.809262
FGSG_00903	related to cysteine synthase	2244	3166.99	2592.29	2499.28	3152.19	2390.65	2821.57	1.41131	1.15521	1.11376	1.40472	1.06535	1.25738
FGSG_00904	probable dUTP pyrophosphatase	3062	3170.02	3441.27	3134.25	3060.43	3292.19	2949.6	1.03528	1.12386	1.0236	0.999487	1.07518	0.963292
FGSG_00905	conserved hypothetical protein	4136	3553.78	3474.44	4524.09	3442.41	4015.85	2541.34	0.859231	0.840048	1.09383	0.832304	0.97095	0.614444
FGSG_00906	probable alanine--tRNA ligase, cytosolic	13568	13048.7	12994.6	12069.7	12966.7	12879	12554.5	0.961726	0.957738	0.889569	0.95568	0.949221	0.925304
FGSG_00907	conserved hypothetical protein	956	933.13	899.84	1054.57	895.87	908.28	870.87	0.976077	0.941255	1.10311	0.937103	0.950084	0.910952
FGSG_00908	conserved hypothetical protein	6778	6951.03	6147.42	7102.62	6768.95	6795.96	5933.02	1.02553	0.906967	1.04789	0.998665	1.00265	0.875335
FGSG_00910	related to morphogenesis-related protein MSB1	4394	4640.41	4473.76	4661.25	4555.08	4619.58	4893.05	1.05608	1.01815	1.06082	1.03666	1.05134	1.11358
FGSG_00911	probable uracil-DNA glycosylase	4320	4861.58	4114.49	4908.13	5089.62	4429.57	3553.53	1.12537	0.952428	1.13614	1.17815	1.02536	0.822576
FGSG_00912	conserved hypothetical protein	8364	6533.95	7924.99	7729.47	6640.48	7609.91	6434.28	0.781199	0.947512	0.924136	0.793936	0.909841	0.769283
FGSG_00913	conserved hypothetical protein	391	576.64	600.26	608.56	691.69	512.09	593.06	1.47478	1.53519	1.55642	1.76903	1.30969	1.51678
FGSG_00914	conserved hypothetical protein	1016	1420.91	1131.98	1319.74	1326.03	1494.49	1765.89	1.39853	1.11415	1.29896	1.30515	1.47095	1.73808
FGSG_00915	related to COMPASS component SWD1	5369	5278.66	4311.26	5872.28	5407.36	5518.43	3319.2	0.983174	0.802991	1.09374	1.00714	1.02783	0.618216
FGSG_00916	probable DNA-directed RNA polymerase II largest chain	22100	15955.1	20216.5	21872.7	16128	23201.7	27317	0.721952	0.914774	0.989716	0.729775	1.04985	1.23606
FGSG_00917	conserved hypothetical protein	32055	32353.6	42240.4	37764.5	30424.2	41651.7	28305	1.00932	1.31775	1.17811	0.949124	1.29938	0.883015
FGSG_00919	hypothetical protein	69	107.05	85.12	98.55	123.89	70.08	100.25	1.55145	1.23362	1.42826	1.79551	1.01565	1.4529
FGSG_00920	conserved hypothetical protein	89	144.41	81.8	89.4	144.53	103.77	99.04	1.62258	0.919101	1.00449	1.62393	1.16596	1.11281
FGSG_00921	probable heat shock protein 70	54013	42654.4	51403.5	44051.2	43364.4	46459.9	43849	0.789707	0.951688	0.815568	0.802852	0.860162	0.811823
FGSG_00923	conserved hypothetical protein	1502	1561.28	1592.96	1525.98	1562.33	1498.53	2070.28	1.03947	1.06056	1.01597	1.04017	0.99769	1.37835
FGSG_00924	conserved hypothetical protein	2501	2960.98	2884.12	2524.67	2948.01	2359.65	4066.87	1.18392	1.15319	1.00946	1.17873	0.943483	1.6261
FGSG_00925	related to glutamate carboxypeptidase II	5130	5021.14	5711.87	4943.69	5113.71	5093.93	7052.71	0.97878	1.11342	0.963682	0.996825	0.992969	1.3748
FGSG_00926	probable cytochrome-b5 reductase, mitochondrial outer membrane form	3203	3295.25	2837.7	2766.47	3293.28	2881.17	2123.42	1.0288	0.885951	0.863712	1.02819	0.899522	0.662947
FGSG_00927	hypothetical protein	712	1150.26	662.17	834.11	1007.14	842.25	1373.34	1.61553	0.930014	1.1715	1.41452	1.18294	1.92885
FGSG_00928	conserved hypothetical protein	1010	1334.06	742.86	1298.4	1298.5	1126.6	1223.56	1.32085	0.735505	1.28554	1.28564	1.11545	1.21145
FGSG_00930	related to suppressor of cs mutant of sua7	2530	2494.41	2754.79	2406.82	2647.47	2608.96	2563.08	0.985933	1.08885	0.951312	1.04643	1.03121	1.01308
FGSG_00932	related to GRIP1 associated protein 1	15657	11688.4	12636.4	16284.9	12112.1	15143	9318.65	0.746528	0.807078	1.0401	0.773589	0.967171	0.595175
FGSG_00934	related to transcription factor jumonji	5142	5696.75	5122.67	5313.5	6017.61	5120.89	4518.61	1.10789	0.996241	1.03335	1.17029	0.995895	0.878765
FGSG_00935	conserved hypothetical protein	3642	4055.69	4352.17	3719.45	4177.69	3484.9	4135.72	1.11359	1.19499	1.02127	1.14709	0.956864	1.13556
FGSG_00936	hypothetical protein	2337	1848.09	1384.03	3007.26	1683.92	2963.38	3761.28	0.790796	0.592225	1.2868	0.720548	1.26803	1.60945
FGSG_00939	conserved hypothetical protein	10731	7715.51	7762.48	10920.6	7778.39	10507.2	6154.06	0.718993	0.72337	1.01767	0.724852	0.979149	0.573484
FGSG_00940	probable peptidylprolyl isomerase (cyclophilin)-like protein	594	575.63	602.47	578.08	613.69	630.68	532.67	0.969074	1.01426	0.973199	1.03315	1.06175	0.896751
FGSG_00941	related to G1/S-specific cyclin	5310	4378.85	5504.05	4901.02	4168.51	5763.69	6069.51	0.824642	1.03654	0.922979	0.78503	1.08544	1.14303
FGSG_00942	hypothetical protein	71	110.08	66.33	74.17	127.33	80.86	134.07	1.55042	0.934225	1.04465	1.79338	1.13887	1.88831
FGSG_00943	hypothetical protein	79	98.97	72.96	105.66	76.85	109.16	96.63	1.25278	0.923544	1.33747	0.972785	1.38177	1.22316
FGSG_00944	conserved hypothetical protein	388	748.32	442.18	534.4	710.05	436.62	597.89	1.92866	1.13964	1.37732	1.83003	1.12531	1.54095
FGSG_00945	related to peptidylprolyl isomerase (cyclophilin)-like protein	1421	1360.31	1507.84	1465.02	1477.45	1385.33	1461.51	0.957291	1.06111	1.03098	1.03973	0.974898	1.02851
FGSG_00946	related to heat shock transcription factor	6749	5694.73	5981.6	7462.27	5904.05	6844.47	5290.44	0.843789	0.886294	1.10569	0.874804	1.01415	0.783885
FGSG_00947	related to cobalt accumulation protein COT1	6818	6532.94	6888.07	6955.3	6797.63	7031.79	7754.47	0.95819	1.01028	1.02014	0.997012	1.03136	1.13735
FGSG_00949	conserved hypothetical protein	6752	8304.27	6940.03	6014.52	7927.51	6597.86	5841.22	1.2299	1.02785	0.890776	1.1741	0.977171	0.86511
FGSG_00950	related to putative snare protein syn	7241	6111.81	6611.71	6429.03	6172.47	6659.85	6875.15	0.844056	0.913093	0.887865	0.852433	0.919742	0.949475
FGSG_00951	conserved hypothetical protein	1582	1955.13	1833.95	1885.63	1939.72	2057.79	1541.23	1.23586	1.15926	1.19193	1.22612	1.30075	0.974229
FGSG_00952	related to chitinase	410	477.67	468.71	453.12	451.95	440.67	630.5	1.16505	1.1432	1.10517	1.10232	1.0748	1.5378
FGSG_00955	conserved hypothetical protein	5627	5886.61	7093.69	6290.86	5807.7	5631.63	7470.63	1.04614	1.26065	1.11798	1.03211	1.00082	1.32764
FGSG_00956	conserved hypothetical protein	2716	3274.04	2104.78	2937.16	3278.37	2735.63	2111.34	1.20546	0.774956	1.08143	1.20706	1.00723	0.777371
FGSG_00957	conserved hypothetical protein	3361	2834.74	3159.38	3041.8	2941.13	3126.44	3069.18	0.843422	0.940012	0.905028	0.875076	0.930211	0.913175
FGSG_00959	related to tpa inducible protein	5979	5646.26	6496.74	6057.19	5756.08	5901.15	6120.24	0.944349	1.08659	1.01308	0.962716	0.986979	1.02362
FGSG_00960	probable to N-acetylglucosaminyltransferase SPT14	1278	1326.99	1261.32	1256.75	1326.03	1110.42	1209.07	1.03833	0.986948	0.983372	1.03758	0.868873	0.946064
FGSG_00961	related to ATP dependent RNA helicase	2249	3582.06	2804.53	2595.79	3576.61	2416.25	3053.47	1.59273	1.24701	1.1542	1.59031	1.07437	1.3577
FGSG_00964	conserved hypothetical protein	1032	1167.43	1250.27	1139.91	1145.94	1084.82	1123.31	1.13123	1.2115	1.10456	1.11041	1.05118	1.08848
FGSG_00965	related to ankyrin	208	265.6	224.41	250.94	252.36	219.66	288.68	1.27692	1.07889	1.20644	1.21327	1.05606	1.38788
FGSG_00966	conserved hypothetical protein	866	843.25	714.12	1000.73	871.79	902.89	651.04	0.97373	0.824619	1.15558	1.00669	1.0426	0.751778
FGSG_00967	conserved hypothetical protein	5934	5104.96	7190.97	6712.48	5204.33	5918.67	6796.64	0.86029	1.21183	1.13119	0.877036	0.997417	1.14537
FGSG_00968	related to esterase	2173	2803.44	2340.24	2246.3	2634.86	2309.79	2881.96	1.29012	1.07696	1.03373	1.21254	1.06295	1.32626
FGSG_00969	probable 5-aminoimidazole-4-carboxamide ribonucleotide transformylase/IMP cyclohydrolase	9064	8046.75	7874.14	8043.4	8354.23	8484.5	7011.64	0.88777	0.868727	0.887401	0.921694	0.936066	0.77357
FGSG_00970	related to cell cycle checkpoint protein RAD17	4116	4181.93	3749.69	3897.24	4196.04	4138.48	3654.99	1.01602	0.911003	0.946851	1.01945	1.00546	0.887996
FGSG_00971	conserved hypothetical protein	3041	2407.56	2424.26	2620.18	2434.12	2808.4	2002.64	0.7917	0.797192	0.861618	0.800434	0.923512	0.658547
FGSG_00972	conserved hypothetical protein	996	884.66	949.58	962.12	937.17	939.28	874.49	0.888213	0.953394	0.965984	0.940934	0.943052	0.878002
FGSG_00973	conserved hypothetical protein	1036	918.99	1240.32	1057.62	930.29	931.19	1674.1	0.887056	1.19722	1.02087	0.897963	0.898832	1.61593
FGSG_00974	conserved hypothetical protein	2949	3272.02	3703.26	2956.46	3258.87	3157.43	5664.87	1.10954	1.25577	1.00253	1.10508	1.07068	1.92095
FGSG_00975	conserved hypothetical protein	1664	2000.58	1625.01	1913.06	2085.4	1733.02	1903.59	1.20227	0.976569	1.14968	1.25325	1.04148	1.14398
FGSG_00977	conserved hypothetical protein	1532	1732.96	1145.25	1489.41	1759.63	1495.84	756.12	1.13117	0.747552	0.9722	1.14858	0.976397	0.493551
FGSG_00979	probable aldehyde dehydrogenase	20902	32841.4	19520.1	22294.3	33368.7	23581.7	22654.7	1.57121	0.933885	1.06661	1.59644	1.1282	1.08385
FGSG_00980	hypothetical protein	82	125.23	90.65	102.61	133.06	86.25	85.76	1.5272	1.10549	1.25134	1.62268	1.05183	1.04585
FGSG_00982	related to retrograde regulation protein RTG2	3655	3578.02	3201.39	3820.03	3530.73	3472.77	3491.93	0.978938	0.875893	1.04515	0.966	0.950142	0.955384
FGSG_00983	conserved hypothetical protein	3143	2537.84	2761.42	2912.77	2593.56	3037.49	3229.82	0.807458	0.878594	0.926748	0.825186	0.96643	1.02762
FGSG_00984	conserved hypothetical protein	1604	852.34	1094.4	1620.47	816.73	1436.54	826.18	0.531384	0.682294	1.01027	0.509183	0.895599	0.515075
FGSG_00986	probable annexin XIV	7958	9018.26	7220.81	7904.21	8821.09	8051.92	6565.94	1.13323	0.907365	0.993241	1.10846	1.0118	0.825074
FGSG_00987	conserved hypothetical protein	5307	19010	8776.18	6609.87	17182.2	5247.56	14039	3.58207	1.6537	1.2455	3.23765	0.9888	2.64537
FGSG_00989	probable rhamnogalacturonase B precursor	54	53.52	61.91	66.04	64.24	53.9	68.85	0.991111	1.14648	1.22296	1.18963	0.998148	1.275
FGSG_00990	related to dehydrogenase/reductase	165	71.7	135.97	197.1	88.33	137.46	64.02	0.434545	0.824061	1.19455	0.535333	0.833091	0.388
FGSG_00992	conserved hypothetical protein	10182	20114.9	11881.4	13653.6	19007.2	12078.5	18862	1.97553	1.1669	1.34095	1.86675	1.18626	1.85248
FGSG_00993	conserved hypothetical protein	1566	3183.15	1768.72	1909	3042.07	1578.04	2843.31	2.03266	1.12945	1.21903	1.94257	1.00769	1.81565
FGSG_00994	related to integral membrane protein	943	1524.92	1318.8	1314.66	1579.54	1102.34	1841.99	1.61709	1.39852	1.39413	1.67502	1.16897	1.95333
FGSG_00995	conserved hypothetical protein	3524	3689.1	3319.67	3608.71	3521.55	3727.47	4607.99	1.04685	0.942018	1.02404	0.999305	1.05774	1.3076
FGSG_00996	related to proline-rich protein verprolin	3852	5594.75	5236.53	4245.72	5450.95	5901.15	5128.58	1.45243	1.35943	1.10221	1.4151	1.53197	1.33141
FGSG_00997	related to mitochondrial ribosomal protein L37p	2320	2054.1	2204.27	2179.25	2112.93	2149.42	2046.12	0.885388	0.950116	0.939332	0.910746	0.926474	0.881948
FGSG_00998	probable NADH-ubiquinone oxidoreductase 12 kDa subunit, mitochondrial precursor	3384	3079.13	3602.67	3064.15	3233.64	3333.97	3122.32	0.909908	1.06462	0.905482	0.955567	0.985216	0.922671
FGSG_00999	conserved hypothetical protein	11965	9244.47	9920.33	11873.6	9199.63	13387.1	10992.8	0.772626	0.829112	0.99236	0.768878	1.11885	0.918742
FGSG_01000	probable cytochrome P450 51 (eburicol 14 alpha-demethylase)	4702	5660.4	5165.78	4709	5712.49	4661.35	5018.67	1.20383	1.09863	1.00149	1.21491	0.991355	1.06735
FGSG_01002	related to transcription initiation factor TFIID subunit	3841	3588.12	3464.49	3815.97	3616.76	4057.63	2680.25	0.934163	0.901976	0.993483	0.941619	1.0564	0.6978
FGSG_01003	conserved hypothetical protein	11236	11984.3	10988.2	11351.4	11773.7	11344.1	10513.2	1.0666	0.977945	1.01027	1.04785	1.00962	0.935674
FGSG_01005	conserved hypothetical protein	559	783.67	709.7	697.97	829.34	641.46	888.99	1.40191	1.26959	1.2486	1.48361	1.14751	1.59032
FGSG_01006	related to sulfate transporter	2231	1799.61	2292.71	2081.71	1828.46	2025.45	1881.85	0.806638	1.02766	0.933084	0.81957	0.907866	0.843501
FGSG_01007	probable PSF1 - part of GINS, replication multiprotein complex	1857	1893.53	1841.68	1882.58	1878.93	1944.59	1610.08	1.01967	0.99175	1.01377	1.01181	1.04717	0.867033
FGSG_01008	probable EFB1 - translation elongation factor eEF1beta	16654	15851.1	17594.4	14939.8	16020.2	16190.1	15054.8	0.951791	1.05647	0.897068	0.961943	0.972144	0.903974
FGSG_01010	related to cold sensitive U2 snRNA supressor	1300	1633.99	1576.37	1359.36	1689.66	1347.6	1561.77	1.25692	1.21259	1.04566	1.29974	1.03662	1.20136
FGSG_01011	conserved hypothetical protein	2788	1785.47	2375.62	2536.87	1697.69	2363.69	2751.51	0.640412	0.852088	0.909925	0.608928	0.847808	0.986912
FGSG_01012	conserved hypothetical protein	2139	1647.12	1910.22	2009.58	1674.75	2193.9	1298.45	0.770042	0.893043	0.939495	0.782959	1.02567	0.607036
FGSG_01013	probable EMP24, component of the COPII-coated vesicles	6281	6671.29	7454.06	6028.74	6481.04	6460.4	7487.54	1.06214	1.18676	0.959838	1.03185	1.02856	1.19209
FGSG_01014	probable ADP-ribosylation factor	20627	26060	24100	19955.6	25202.6	21850	22928.8	1.26339	1.16837	0.96745	1.22183	1.05929	1.11159
FGSG_01015	probable chaperonin ClpB	2671	2103.59	2087.09	2500.29	2165.7	2414.9	2693.53	0.787566	0.781389	0.936088	0.81082	0.904118	1.00844
FGSG_01016	probable ribosomal protein L6.e.B, cytosolic	24249	19619	22660.7	19620.3	20505.3	22119.5	13681.5	0.809064	0.934499	0.809119	0.845615	0.912183	0.564207
FGSG_01017	probable dipeptidylpeptidase III	13016	10022.1	11993	11399.1	10107	12582.6	9623.04	0.769982	0.921408	0.875778	0.776504	0.966699	0.739324
FGSG_01018	related to thermoresistant gluconokinase	1958	1200.75	1584.11	2176.2	1182.65	1832.74	2037.66	0.613253	0.809045	1.11144	0.604009	0.936027	1.04068
FGSG_01019	related to F1F0 ATPase complex assembly protein	1228	1326.99	1140.83	1499.57	1275.56	1342.21	1200.61	1.08061	0.929015	1.22115	1.03873	1.093	0.977695
FGSG_01020	related to SNARE protein of Golgi compartment	4298	4100.13	3971.89	4341.22	4140.98	4213.95	2924.23	0.953962	0.924125	1.01006	0.963467	0.980444	0.68037
FGSG_01021	probable ribosomal protein L35	15063	12099.4	13745.2	12148.9	12460.8	14221.2	8738.88	0.803254	0.912513	0.806541	0.827246	0.944117	0.580155
FGSG_01022	related to metalloregulatory protein	5575	6177.46	6264.6	5683.31	6517.74	6000.87	8580.65	1.10806	1.1237	1.01943	1.1691	1.07639	1.53913
FGSG_01023	conserved hypothetical protein	2096	1888.48	1769.83	2085.78	1851.4	2359.65	1606.46	0.900992	0.844385	0.995124	0.883302	1.12579	0.766441
FGSG_01024	related to RNA helicase	5509	4795.94	5730.66	5624.39	4956.56	5781.21	5509.06	0.870565	1.04024	1.02095	0.89972	1.04941	1.00001
FGSG_01025	conserved hypothetical protein	1443	1194.69	1364.13	1297.39	1203.29	1420.37	915.56	0.827921	0.945343	0.899092	0.833881	0.984317	0.634484
FGSG_01026	conserved hypothetical protein	10572	6607.67	15812.4	10741.8	6204.59	10783.5	14389.3	0.625016	1.49569	1.01606	0.586889	1.02001	1.36107
FGSG_01027	related to L-lactate dehydrogenase	2413	2059.15	2415.41	2333.67	2241.41	2303.05	2352.92	0.853357	1.001	0.967124	0.928889	0.954434	0.975102
FGSG_01028	related molecular chaperone	4981	3821.4	3350.63	5610.16	3643.15	4990.17	2473.7	0.767195	0.672682	1.12631	0.731409	1.00184	0.496627
FGSG_01030	related to cell division control protein CDC18+	2834	2909.47	2556.91	2800	3071.9	2823.23	2023.17	1.02663	0.902227	0.988003	1.08394	0.9962	0.713892
FGSG_01031	related to benzodiazepine receptor, peripheral-type	2357	2995.31	2260.65	2165.02	2810.36	2197.94	2294.94	1.27081	0.959122	0.918549	1.19235	0.932516	0.97367
FGSG_01032	probable mitochondrial amino acid transporter ARG-13	964	1616.82	1203.84	1020.03	1638.04	1025.52	1246.51	1.6772	1.2488	1.05812	1.69921	1.06382	1.29306
FGSG_01033	related to SHR3 - endoplasmatic reticulum membrane protein	6976	6555.15	6381.78	7459.22	6685.22	7011.57	4780.72	0.939672	0.914819	1.06927	0.958317	1.0051	0.68531
FGSG_01034	conserved hypothetical protein	120	146.43	133.76	199.13	150.27	129.37	208.96	1.22025	1.11467	1.65942	1.25225	1.07808	1.74133
FGSG_01035	probable DNA repair protein MUS-42	2240	2608.53	1989.81	2483.02	2686.48	2336.74	1794.88	1.16452	0.888308	1.10849	1.19932	1.04319	0.801286
FGSG_01036	conserved hypothetical protein	1596	1494.63	1589.64	1455.88	1596.74	1745.14	1303.28	0.936485	0.996015	0.912206	1.00046	1.09345	0.816591
FGSG_01037	related to uridine ribohydrolase	2495	2647.91	2342.45	2991	2611.91	2533.49	2063.03	1.06129	0.938858	1.1988	1.04686	1.01543	0.826866
FGSG_01038	related to TPC1 - mitochondrial transport protein	2533	2224.77	2007.5	2961.54	2305.64	2561.79	1979.69	0.878314	0.792538	1.16918	0.910241	1.01137	0.781559
FGSG_01039	conserved hypothetical protein	2850	4017.32	3537.45	3003.19	4146.72	2953.94	4339.85	1.40959	1.24121	1.05375	1.45499	1.03647	1.52275
FGSG_01040	conserved hypothetical protein	1880	2558.03	2552.49	2190.42	2549.97	1846.21	3156.14	1.36065	1.35771	1.16512	1.35637	0.982027	1.6788
FGSG_01044	related to PKR1 protein	3685	3749.7	3502.07	4262.99	3695.91	3794.85	2890.41	1.01756	0.950358	1.15685	1.00296	1.02981	0.784372
FGSG_01045	conserved hypothetical protein	2961	3924.41	2768.05	3196.23	3972.36	3236.94	2152.41	1.32537	0.934836	1.07944	1.34156	1.09319	0.72692
FGSG_01046	related to component of the anaphase promoting complex	3921	3874.92	4047.06	3913.5	3942.53	3777.33	3886.9	0.988248	1.03215	0.998087	1.00549	0.963359	0.991303
FGSG_01047	conserved hypothetical protein	18051	15042.2	15689.7	18170.5	15245.9	16090.4	13857.8	0.833317	0.869186	1.00662	0.844603	0.891383	0.767703
FGSG_01049	conserved hypothetical protein	27917	18884.8	24010.4	29790.1	19157.5	26815.9	46079.9	0.676463	0.860064	1.0671	0.68623	0.960559	1.6506
FGSG_01050	conserved hypothetical protein	3208	2252.04	2638.71	3203.34	2442.15	3073.88	2065.44	0.702007	0.822541	0.998547	0.761269	0.958192	0.64384
FGSG_01051	conserved hypothetical protein	3064	2805.46	2839.91	3170.83	2829.86	3154.74	3034.15	0.91562	0.926864	1.03487	0.923584	1.02961	0.990258
FGSG_01052	probable proliferating cell nuclear antigen	14646	11494.5	11545.3	14376.9	11548.9	13985.4	7560.01	0.784821	0.788293	0.981628	0.788533	0.954896	0.516183
FGSG_01053	related to pyridoxal kinase	2908	3197.29	3496.55	3276.49	3192.34	2819.18	3459.32	1.09948	1.20239	1.12672	1.09778	0.969457	1.18959
FGSG_01054	conserved hypothetical protein	1242	1035.13	853.41	1396.95	1022.05	1296.39	618.43	0.833438	0.687126	1.12476	0.822907	1.04379	0.497931
FGSG_01055	related to hnRNP protein E2	6764	7424.66	6082.2	6907.55	7312.67	6835.04	5943.89	1.09767	0.899202	1.02122	1.08112	1.0105	0.878754
FGSG_01056	conserved hypothetical protein	2845	2853.93	2680.72	2775.62	2673.86	2472.85	2292.52	1.00314	0.942257	0.975613	0.939845	0.869192	0.805807
FGSG_01057	related to human and mouse neutral sphingomyelinase	2611	2813.53	2397.73	2355.01	2802.33	2378.52	2273.2	1.07757	0.918319	0.901957	1.07328	0.910961	0.870624
FGSG_01058	related to cell wall biosynthesis kinase	73425	70177.8	56259.8	89378.6	70395.5	69286.9	44349.1	0.955775	0.766221	1.21728	0.95874	0.943642	0.604005
FGSG_01059	probable FPR3 - prolyl cis-trans isomerase	11171	14419.1	12224.1	11737.5	14635.7	11179.7	10618.3	1.29076	1.09427	1.05071	1.31015	1.00078	0.950525
FGSG_01060	conserved hypothetical protein	160	202.99	139.29	194.05	190.42	142.85	164.27	1.26869	0.870562	1.21281	1.19012	0.892813	1.02669
FGSG_01061	conserved hypothetical protein	2989	1917.77	1992.02	3142.38	1843.37	2765.28	980.78	0.641609	0.66645	1.05131	0.616718	0.925152	0.32813
FGSG_01062	conserved hypothetical protein	666	983.63	831.3	742.67	988.79	750.61	835.84	1.47692	1.2482	1.11512	1.48467	1.12704	1.25502
FGSG_01063	probable CDC21 - thymidylate synthase	1318	1033.11	1018.12	1305.52	1080.56	1181.85	702.98	0.783847	0.772473	0.990531	0.819848	0.8967	0.533369
FGSG_01064	conserved hypothetical protein	5917	4671.72	5196.73	6342.67	4767.29	5688.23	4106.73	0.789542	0.878271	1.07194	0.805694	0.961337	0.694056
FGSG_01065	related to cell cycle arrest protein BUB2	2558	2557.02	2292.71	2682.15	2592.41	2780.1	2253.87	0.999617	0.89629	1.04853	1.01345	1.08683	0.881106
FGSG_01066	probable sulfate permease SutB	2000	2340.91	2695.09	2596.81	2451.32	2211.41	2958.05	1.17046	1.34754	1.29841	1.22566	1.1057	1.47903
FGSG_01067	conserved hypothetical protein	1266	1049.27	1095.5	1363.43	1054.17	1327.39	856.37	0.828807	0.865324	1.07696	0.832678	1.04849	0.676438
FGSG_01068	conserved hypothetical protein	12317	8930.4	10609	10526.4	9449.69	11162.2	12362.5	0.725047	0.861331	0.854625	0.767207	0.906243	1.00369
FGSG_01069	conserved hypothetical protein	1348	1706.7	1133.09	1185.63	1580.68	1255.96	1183.7	1.2661	0.840571	0.879547	1.17261	0.931721	0.878116
FGSG_01070	conserved hypothetical protein	7161	9260.63	7482.81	7172.72	8604.29	7578.91	10299.4	1.2932	1.04494	1.00164	1.20155	1.05836	1.43827
FGSG_01072	conserved hypothetical protein	73	39.39	44.22	73.15	56.21	88.94	43.48	0.539589	0.605753	1.00205	0.77	1.21836	0.595616
FGSG_01076	hypothetical protein	1535	1804.66	1281.22	2071.55	1580.68	3133.17	2558.25	1.17567	0.834671	1.34954	1.02976	2.04115	1.66661
FGSG_01077	hypothetical protein	3009	2689.32	2743.73	3732.66	2402	7401.03	5509.06	0.893759	0.911841	1.2405	0.798272	2.45963	1.83086
FGSG_01078	hypothetical protein	648	2436.85	972.8	865.6	2844.77	2573.92	1116.06	3.76057	1.50123	1.3358	4.39008	3.9721	1.72231
FGSG_01081	probable ribosomal protein L11.e.A, cytosolic	18175	12913.4	17186.5	13434.1	13313.1	15903	9540.9	0.710502	0.94561	0.739153	0.732494	0.874996	0.524946
FGSG_01083	conserved hypothetical protein	11924	12201.4	10168	13004.4	12028.3	13034	9005.82	1.02326	0.85273	1.0906	1.00875	1.09309	0.755268
FGSG_01084	conserved hypothetical protein	822	1129.05	1141.93	932.66	1092.03	867.86	1541.23	1.37354	1.38921	1.13462	1.3285	1.05579	1.87498
FGSG_01085	related to thioredoxin-like protein	4650	6801.56	5661.02	5080.84	6641.63	5227.35	6231.36	1.4627	1.21742	1.09265	1.42831	1.12416	1.34008
FGSG_01086	probable acetolactate synthase	8453	8283.06	8442.34	8372.57	8039.93	9398.17	7127.59	0.979896	0.998739	0.990485	0.951133	1.11181	0.843202
FGSG_01087	conserved hypothetical protein	602	1299.72	813.61	822.93	1281.3	1086.17	1079.83	2.159	1.35151	1.36699	2.12841	1.80427	1.79374
FGSG_01088	conserved hypothetical protein	15155	18013.3	13768.4	15924.2	16968.8	19991.7	15164.7	1.1886	0.908506	1.05076	1.11969	1.31915	1.00064
FGSG_01089	hypothetical protein	225	194.91	168.03	231.64	191.56	199.45	187.22	0.866267	0.7468	1.02951	0.851378	0.886444	0.832089
FGSG_01091	related to RRP46 protein, involved in rRNA processing	1694	2270.22	1659.28	1675.33	2353.82	1684.5	1416.82	1.34015	0.979504	0.988979	1.3895	0.994392	0.836375
FGSG_01092	related to phosphotyrosyl phosphatase activator PTPA	5206	6030.01	5049.71	5532.95	5884.55	5355.37	4103.11	1.15828	0.969979	1.0628	1.13034	1.02869	0.78815
FGSG_01094	conserved hypothetical protein	1950	2696.39	2156.74	2286.94	2786.27	2122.47	2362.58	1.38276	1.10602	1.17279	1.42886	1.08845	1.21158
FGSG_01095	related to secreted dipeptidyl-peptidase V precursor	10435	11735.9	10605.7	11357.5	11753	10163.6	9130.23	1.12466	1.01636	1.0884	1.12631	0.973992	0.874962
FGSG_01096	related to TAF(II) complex (TBP-associated protein complex) component	2599	2448.97	2381.14	2528.74	2521.3	2773.36	1963.98	0.942274	0.916175	0.972967	0.970104	1.06709	0.755668
FGSG_01097	conserved hypothetical protein	1578	1754.17	1539.89	1734.25	1697.69	1704.72	1926.54	1.11164	0.975849	1.09902	1.07585	1.0803	1.22087
FGSG_01098	related to NAS2 - ubiquitin-dependent protein catabolism	3416	5226.15	4075.8	3632.08	5151.56	3503.76	3729.88	1.5299	1.19315	1.06326	1.50807	1.02569	1.09189
FGSG_01099	probable GSP1 - GTP-binding protein of the ras superfamily	20306	22293.2	22801.1	18682.6	22731.8	19541.6	20286	1.09786	1.12287	0.920053	1.11946	0.962354	0.999017
FGSG_01100	related to LIM homeobox protein	19079	15920.8	15694.1	18900	16574.2	19394.7	12820.2	0.834468	0.822585	0.990618	0.868717	1.01655	0.671956
FGSG_01101	conserved hypothetical protein	1540	1487.56	1537.68	1824.67	1597.89	1456.76	1556.93	0.965948	0.998494	1.18485	1.03759	0.945948	1.01099
FGSG_01102	related to RNA 3`-terminal phosphate cyclase-like protein	941	1187.62	1176.2	1124.67	1238.85	928.5	1123.31	1.26208	1.24995	1.19519	1.31652	0.986716	1.19374
FGSG_01103	conserved hypothetical protein	6505	6181.5	5201.15	7158.49	6047.44	6128.89	4145.38	0.950269	0.799562	1.10046	0.92966	0.942181	0.637261
FGSG_01104	probable phenylalanine-tRNA ligase beta chain	4531	4704.04	4940.27	4503.78	5029.97	4789.38	4758.98	1.03819	1.09033	0.993992	1.11012	1.05702	1.05032
FGSG_01105	related to component of the ribosomal RNA processing machinery	2047	2232.85	2549.17	2213.79	2438.7	2285.53	2176.57	1.09079	1.24532	1.08148	1.19135	1.11653	1.0633
FGSG_01106	related to arsenite-resistance protein 2	8822	7904.36	9070.23	8854.14	7893.1	10077.4	9487.76	0.895983	1.02814	1.00364	0.894706	1.1423	1.07547
FGSG_01107	probable molybdenum cofactor sulfurase HxB protein	4064	3288.18	3905.56	4129.9	3421.76	3944.43	3601.84	0.809099	0.961014	1.01622	0.841969	0.970578	0.88628
FGSG_01108	related to glycosyl hydrolase, family 15	5569	3560.85	4298	4845.14	3819.8	4903.92	4533.11	0.639406	0.771772	0.87002	0.685904	0.880575	0.81399
FGSG_01109	related to vanadate resistance protein Gog5p, member of the triose phosphate translocater family	2842	2799.4	3201.39	2886.36	2906.72	2931.03	3733.5	0.985011	1.12646	1.01561	1.02277	1.03133	1.31369
FGSG_01111	probable phosphogluconate dehydrogenase (decarboxylating)	28028	24569.5	26639.2	24622.9	25870.2	25613.9	24344.5	0.876604	0.950449	0.878512	0.923014	0.913867	0.868576
FGSG_01112	conserved hypothetical protein	3371	3301.31	3529.71	3174.89	3210.69	3332.62	3001.54	0.979327	1.04708	0.941824	0.952444	0.988615	0.8904
FGSG_01114	hypothetical protein	109	245.4	119.39	149.35	263.83	121.28	196.88	2.25138	1.09532	1.37018	2.42046	1.11266	1.80624
FGSG_01115	conserved hypothetical protein	1636	1496.65	1370.76	1937.45	1456.8	1994.45	1880.64	0.914823	0.837873	1.18426	0.890465	1.2191	1.14954
FGSG_01116	related to transcription initiation factor TFIIF subunit	3996	4804.01	4183.03	4057.77	4597.52	4410.7	5092.35	1.2022	1.0468	1.01546	1.15053	1.10378	1.27436
FGSG_01117	conserved hypothetical protein	12778	9412.11	10429.9	13818.1	9850.03	13794	9732.95	0.736587	0.816242	1.0814	0.770859	1.07952	0.761696
FGSG_01118	probable ubiquitin-like protein ubl1	3226	4213.23	3106.32	3321.19	4319.93	3522.63	2813.11	1.30602	0.962901	1.02951	1.3391	1.09195	0.872012
FGSG_01119	probable prohibitin PHB2	11298	12251.9	10442.1	12346	12871.5	10259.3	10135.2	1.08443	0.924243	1.09276	1.13927	0.908062	0.897076
FGSG_01120	related to verprolin	2075	1639.04	2332.5	1979.1	1748.16	2044.31	3411	0.789899	1.1241	0.953783	0.842487	0.98521	1.64386
FGSG_01121	related to density-regulated protein, translation initiation factor	3094	3083.17	3021.2	3329.32	3087.96	3108.92	2165.7	0.9965	0.976471	1.07606	0.998048	1.00482	0.699968
FGSG_01122	conserved hypothetical protein	2445	2228.81	2251.81	2433.24	2348.09	2386.6	1612.5	0.911579	0.920986	0.99519	0.960364	0.976115	0.659509
FGSG_01123	probable multiubiquitin chain binding protein (MBP1)	5446	6151.2	5623.44	5416.11	5988.94	5473.96	4537.94	1.12949	1.03258	0.994512	1.0997	1.00513	0.833261
FGSG_01124	probable TRS23 - TRAPP subunit of 20 kDa involved in targeting and fusion of ER to golgi transpor	919	1093.7	871.1	1058.64	999.11	886.72	815.31	1.1901	0.947878	1.15195	1.08717	0.964875	0.887171
FGSG_01125	related to DNA-directed RNA polymerase II chain	1729	1390.61	1710.13	1747.46	1623.13	1917.64	1561.77	0.804286	0.989086	1.01068	0.938768	1.1091	0.903279
FGSG_01126	conserved hypothetical protein	5164	21202.5	14808.6	7225.55	19255	5544.03	14101.8	4.10583	2.86767	1.39922	3.7287	1.07359	2.73079
FGSG_01127	conserved hypothetical protein	13898	26692.2	16821.7	16294.1	23681.6	17528.3	22658.3	1.92058	1.21037	1.1724	1.70396	1.26121	1.63033
FGSG_01128	conserved hypothetical protein	2344	2778.19	2689.57	2542.96	2919.33	2100.91	2548.59	1.18523	1.14743	1.08488	1.24545	0.896293	1.08728
FGSG_01129	conserved hypothetical protein	3386	3643.66	3517.55	3238.9	3655.76	3432.34	3582.52	1.0761	1.03885	0.956556	1.07967	1.01369	1.05804
FGSG_01130	conserved hypothetical protein	1082	1341.13	1187.26	1152.11	1417.8	1107.73	1123.31	1.23949	1.09728	1.0648	1.31035	1.02378	1.03818
FGSG_01131	probable riboflavin synthase, alpha chain	3800	4382.89	4083.54	4136	4348.6	4235.51	3700.89	1.15339	1.07462	1.08842	1.14437	1.11461	0.973918
FGSG_01132	related to MUS81 protein, involved in the repair of UV-and methylation-induced DNA damage	1471	1498.67	1239.21	1573.73	1696.54	1417.68	913.14	1.01881	0.842427	1.06984	1.15332	0.963753	0.620761
FGSG_01133	probable phosphoacetylglucosamine mutase	14955	14630.2	14318.9	13827.3	14823.8	14074.4	12015.8	0.97828	0.957467	0.924593	0.991226	0.941113	0.803464
FGSG_01134	probable hnRNP arginine N-methyltransferase	6264	7001.52	6623.87	6463.57	7083.26	6293.3	5995.83	1.11774	1.05745	1.03186	1.13079	1.00468	0.957189
FGSG_01135	probable NSA2 - involved in biogenesis of ribosomal large subunit	2674	3107.41	3004.62	2779.68	3308.2	2813.79	3361.48	1.16208	1.12364	1.03952	1.23717	1.05228	1.2571
FGSG_01136	related to ribosomal protein YmL49	1623	1703.67	1735.56	1767.78	1620.83	1572.65	1519.49	1.0497	1.06935	1.08921	0.998663	0.968977	0.936223
FGSG_01137	related to protein kinase RPK1	4945	3953.69	4242.73	5132.66	4253.39	4744.91	2680.25	0.799533	0.857984	1.03795	0.86014	0.959537	0.542012
FGSG_01138	related to PER1 protein, involved in manganese homeostasis	2493	2769.1	2712.78	2710.6	2704.83	2631.87	2486.99	1.11075	1.08816	1.08728	1.08497	1.0557	0.997589
FGSG_01139	conserved hypothetical protein	3198	2174.28	3424.69	3147.46	2402	3025.37	4566.93	0.679887	1.07088	0.984196	0.751094	0.946019	1.42806
FGSG_01140	hypothetical protein	275	207.03	271.94	260.09	232.86	281.65	316.46	0.752836	0.988873	0.945782	0.846764	1.02418	1.15076
FGSG_01141	probable delta-1-pyrroline-5-carboxylate dehydrogenase	4300	3444.71	3887.88	4225.4	3377.02	4098.06	2125.84	0.801095	0.904158	0.982651	0.785353	0.953037	0.494381
FGSG_01142	conserved hypothetical protein	12650	11771.2	11418.2	13221.8	11726.7	12189.1	9160.42	0.93053	0.902626	1.0452	0.927009	0.963562	0.724144
FGSG_01143	hypothetical protein	43	49.48	45.32	62.99	72.27	28.3	53.15	1.1507	1.05395	1.46488	1.6807	0.65814	1.23605
FGSG_01144	conserved hypothetical protein	5760	4649.5	6976.51	5915.97	5083.89	5374.24	9584.38	0.807205	1.2112	1.02708	0.88262	0.933028	1.66395
FGSG_01145	conserved hypothetical protein	593	790.74	533.93	658.35	800.67	559.25	501.26	1.33346	0.900388	1.1102	1.3502	0.943086	0.845295
FGSG_01146	conserved hypothetical protein	2430	3119.53	1734.45	2756.31	3301.31	2133.25	1918.08	1.28376	0.713765	1.13428	1.35856	0.877881	0.789333
FGSG_01148	hypothetical protein	185	204	140.39	180.84	160.59	167.1	120.79	1.1027	0.758865	0.977514	0.868054	0.903243	0.652919
FGSG_01149	conserved hypothetical protein	1266	3030.66	3127.32	1858.2	3295.58	1456.76	10249.9	2.39389	2.47024	1.46777	2.60314	1.15068	8.0963
FGSG_01150	related to PPN1 - vacuolar endopolyphosphatase	3260	2113.69	3724.27	3850.51	2329.73	2991.68	5999.45	0.648371	1.14241	1.18114	0.714641	0.917693	1.84032
FGSG_01151	related to aminomethyltransferase precursor (glycine cleavage system protein T)	2234	2372.22	2523.75	2319.45	2392.82	2103.61	2479.74	1.06187	1.1297	1.03825	1.07109	0.941634	1.11
FGSG_01152	related to vacuolar ATP synthase subunit H	21595	21510.5	18563.9	23872.1	21180.9	20936.3	15231.1	0.996088	0.859637	1.10545	0.980826	0.969499	0.705309
FGSG_01153	conserved hypothetical protein	3941	3073.07	3758.54	3826.13	3253.14	3583.27	4235.97	0.779769	0.953702	0.970853	0.825461	0.909229	1.07485
FGSG_01154	probable ribosomal protein L9.e.c14	25450	20216.8	24527.8	20062.3	20707.2	22002.3	15159.9	0.794375	0.963763	0.788301	0.813642	0.86453	0.595673
FGSG_01155	probable PEP8 - vacuolar protein sorting/targeting protein	3503	3430.57	3411.43	3284.62	3348.34	3091.4	3187.55	0.979323	0.97386	0.937659	0.955849	0.882501	0.909949
FGSG_01156	conserved hypothetical protein	4339	4197.08	4156.5	4103.49	4181.13	4490.21	3996.82	0.967292	0.95794	0.945723	0.963616	1.03485	0.921139
FGSG_01157	probable Rad51 homolog MEI-3	2237	3121.55	1673.65	2569.38	3443.55	2130.56	1933.79	1.39542	0.748167	1.14858	1.53936	0.952418	0.864457
FGSG_01158	probable heat shock protein 30	11636	7575.13	16588.4	15313.6	7487.03	11217.4	19365.7	0.651008	1.42561	1.31606	0.643437	0.964029	1.66429
FGSG_01159	conserved hypothetical protein	1321	1526.94	1314.38	1570.68	1491.21	1295.05	1454.27	1.1559	0.994989	1.18901	1.12885	0.980356	1.10089
FGSG_01160	probable proteasome endopeptidase complex subunit PRE7	6667	8001.31	7693.95	6458.49	8117.93	6619.42	6870.32	1.20014	1.15403	0.968725	1.21763	0.992863	1.0305
FGSG_01161	related to phosphatidylinositol-4-kinase	5953	4451.57	5111.61	5071.7	4456.43	5448.35	4874.93	0.747786	0.858661	0.851957	0.748602	0.915228	0.818903
FGSG_01162	conserved hypothetical protein	2551	2535.82	2561.33	2634.4	2671.56	2375.82	2489.4	0.994049	1.00405	1.03269	1.04726	0.931329	0.975853
FGSG_01163	conserved hypothetical protein	8158	9073.8	11240.2	8485.34	9607.99	7639.55	15537.9	1.11226	1.37782	1.04013	1.17774	0.936449	1.90463
FGSG_01164	probable RIB4 - 6,7-dimethyl-8-ribityllumazine synthase	6013	4571.74	4828.61	5385.63	4571.14	5556.16	2970.13	0.760309	0.803028	0.895664	0.76021	0.924025	0.493951
FGSG_01165	related to DNA mismatch repair protein PMS2	13463	9382.83	9956.81	12940.4	9380.87	12827.8	6120.24	0.696935	0.739568	0.961179	0.696789	0.95282	0.454597
FGSG_01166	conserved hypothetical protein	5672	6187.56	7060.52	6340.64	5996.97	6502.18	10067.5	1.0909	1.2448	1.11788	1.05729	1.14636	1.77495
FGSG_01167	related to ribonuclease H	5016	4880.77	4580.99	5619.31	4790.23	4959.17	3633.25	0.97304	0.913276	1.12028	0.95499	0.98867	0.724332
FGSG_01169	related to SLS1 protein precursor	2306	2201.55	2088.2	2412.92	2351.53	2129.21	1558.14	0.954705	0.905551	1.04637	1.01974	0.923335	0.67569
FGSG_01170	related to glutaredoxin	5130	6017.89	5488.57	5044.27	6135.76	5258.34	5360.49	1.17308	1.0699	0.983288	1.19605	1.02502	1.04493
FGSG_01171	related to Zn-dependent oxidoreductases	273	363.56	289.63	296.66	312.01	253.35	198.09	1.33172	1.06092	1.08667	1.14289	0.928022	0.725604
FGSG_01172	conserved hypothetical protein	2039	1720.84	2140.16	2177.21	1844.51	2086.09	2484.57	0.843963	1.04961	1.06778	0.904615	1.02309	1.21852
FGSG_01174	related to peroxisomal targeting signal receptor	9972	7344.88	9121.09	9375.33	7332.17	9629.96	8108.38	0.73655	0.91467	0.940165	0.735276	0.9657	0.813115
FGSG_01175	probable RNA binding protein Rpf2 involved in ribosome biogenesis	1440	1887.47	1555.37	1451.81	1994.78	1239.79	1258.59	1.31074	1.08012	1.0082	1.38526	0.860965	0.874021
FGSG_01176	conserved hypothetical protein	3429	3211.43	3131.75	3600.58	3190.05	3744.99	2815.53	0.93655	0.913313	1.05004	0.930315	1.09215	0.821094
FGSG_01177	probable cystathionine gamma-lyase	6289	3915.32	6571.91	5626.42	3864.53	6801.35	6344.9	0.622566	1.04498	0.894645	0.61449	1.08147	1.00889
FGSG_01179	conserved hypothetical protein	30538	25273.3	24344.3	30622.2	25962	30709.2	15545.2	0.827603	0.79718	1.00276	0.850154	1.0056	0.509044
FGSG_01181	conserved hypothetical protein	706	537.26	664.38	838.17	575.84	712.88	799.6	0.760992	0.941048	1.18721	0.815637	1.00975	1.13258
FGSG_01182	conserved hypothetical protein	3316	3544.69	3156.07	3393.33	3802.59	3259.85	2529.26	1.06897	0.95177	1.02332	1.14674	0.983067	0.762744
FGSG_01183	related to nuclear localization protein NPL6	13585	11102.7	15298.4	14543.5	11836.8	16184.7	20489	0.817273	1.12612	1.07056	0.871312	1.19137	1.5082
FGSG_01184	probable mitotic control protein dis3+	4933	4742.41	4724.7	4729.32	4974.91	4606.1	4144.17	0.961364	0.957774	0.958711	1.0085	0.933732	0.840091
FGSG_01185	related to nuclear GTPase	3241	3372	3231.24	3291.73	3474.52	3067.14	2861.42	1.04042	0.996989	1.01565	1.07205	0.946356	0.882882
FGSG_01186	related to glutamate-1-semialdehyde 2,1-aminomutase	222	338.31	294.05	266.18	295.95	223.7	266.94	1.52392	1.32455	1.19901	1.33311	1.00766	1.20243
FGSG_01187	related to splicing factor 3A subunit 2	1252	1339.11	1292.27	1148.04	1363.89	1265.4	1124.52	1.06958	1.03216	0.916965	1.08937	1.0107	0.898179
FGSG_01188	probable serine/threonine protein kinase COT-1	8355	8982.91	9467.09	8085.05	8823.39	8081.57	9484.13	1.07515	1.1331	0.96769	1.05606	0.967273	1.13514
FGSG_01189	probable TIM54 (component of the mitochondrial TIM22 translocase)	3163	2939.77	3089.74	3387.23	3050.1	3040.19	2512.35	0.929425	0.976838	1.07089	0.964306	0.961173	0.794293
FGSG_01190	conserved hypothetical protein	699	924.04	878.83	746.73	1018.61	725.01	815.31	1.32195	1.25727	1.06828	1.45724	1.03721	1.16639
FGSG_01191	related to cyclin-like protein CLG1	4457	3411.39	4438.39	4291.44	3481.41	4665.4	5778.41	0.7654	0.995825	0.962854	0.781111	1.04676	1.29648
FGSG_01192	hypothetical protein	106	134.31	120.49	109.72	137.65	115.89	120.79	1.26708	1.1367	1.03509	1.29858	1.0933	1.13953
FGSG_01193	related to nuclear localization protein NPL6	15075	13403.2	13511.9	15525	13603.3	15097.2	12140.2	0.889099	0.896314	1.02985	0.902374	1.00147	0.805321
FGSG_01194	related to ubiquitin--protein ligase	11563	10323	10359.2	11307.7	10203.3	10859	9813.88	0.892764	0.895891	0.977921	0.882412	0.939114	0.848731
FGSG_01195	conserved hypothetical protein	1492	1709.73	1752.14	1565.6	1777.98	1529.53	1414.41	1.14593	1.17436	1.04933	1.19168	1.02515	0.947996
FGSG_01196	probable calcium P-type ATPase NCA-3 (Ca2+-transporting ATPase)	18074	23230.3	25435.3	21175.8	23398.3	18397.5	33481.9	1.28529	1.40729	1.17162	1.29458	1.0179	1.85249
FGSG_01197	conserved hypothetical protein	3607	3650.73	3641.36	3572.14	3778.5	3618.31	3563.19	1.01212	1.00953	0.990335	1.04755	1.00314	0.987854
FGSG_01198	probable RPT4 - 26S proteasome regulatory subunit	8158	9362.63	9522.36	7883.89	9448.55	8259.45	8214.67	1.14766	1.16724	0.9664	1.15819	1.01244	1.00695
FGSG_01199	probable GFA1 - glucosamine--fructose-6-phosphate transaminase	17640	19957.3	28113.9	18084.2	19694.3	19583.3	31991.4	1.13137	1.59376	1.02518	1.11646	1.11017	1.81357
FGSG_01200	probable PRE4 - 20S proteasome subunit (beta7)	7639	9142.47	7831.02	7517.13	9009.21	7882.12	7533.43	1.19682	1.02514	0.984046	1.17937	1.03183	0.98618
FGSG_01201	conserved hypothetical protein	5185	4756.55	5194.52	4470.25	5144.68	4867.54	4176.79	0.917367	1.00184	0.86215	0.992224	0.938773	0.805553
FGSG_01202	conserved hypothetical protein	2773	4191.02	3275.45	2902.61	4093.95	3478.16	3128.36	1.51137	1.18119	1.04674	1.47636	1.25429	1.12815
FGSG_01203	related to C-3 sterol dehydrogenase (C-4 decarboxylase)	5569	5291.79	5931.86	5355.15	5339.69	5459.13	5998.24	0.950223	1.06516	0.9616	0.958824	0.980271	1.07708
FGSG_01204	related to GTPase-activating protein of the rho/rac family (LRG1 protein)	5957	4569.72	5415.61	5145.87	4885.44	5646.45	6282.09	0.767118	0.909117	0.863836	0.820118	0.947868	1.05457
FGSG_01205	conserved hypothetical protein	450	741.25	793.71	610.6	720.37	491.87	1079.83	1.64722	1.7638	1.35689	1.60082	1.09304	2.39962
FGSG_01206	conserved hypothetical protein	2130	2521.68	2371.19	2469.81	2527.03	2480.93	2845.72	1.18389	1.11323	1.15954	1.1864	1.16476	1.33602
FGSG_01207	related to ubiquitin-conjugating enzyme	8537	8438.59	7661.89	8105.37	8501.05	8836.22	7707.37	0.988473	0.897492	0.94944	0.995789	1.03505	0.902819
FGSG_01208	probable replication factor protein	1606	1922.82	1602.91	1684.47	1981.02	1673.72	1373.34	1.19727	0.998076	1.04886	1.23351	1.04217	0.855131
FGSG_01209	conserved hypothetical protein	1248	1337.09	1169.57	1249.64	1374.21	1164.33	1134.18	1.07139	0.937155	1.00131	1.10113	0.932957	0.908798
FGSG_01210	related to ATP dependent RNA helicase	10040	8048.77	9229.42	9713.65	8018.13	9427.82	9577.14	0.80167	0.919265	0.967495	0.798619	0.939026	0.953898
FGSG_01211	conserved hypothetical protein	9445	8142.69	8861.3	8913.07	8376.02	9433.21	7305.15	0.862116	0.9382	0.943681	0.886821	0.998752	0.773441
FGSG_01212	related to origin recognition complex subunit 3	1228	1335.07	1242.53	1267.93	1360.44	1303.13	1062.92	1.08719	1.01183	1.03252	1.10785	1.06118	0.86557
FGSG_01213	conserved hypothetical protein	1959	3865.83	2611.08	2503.34	3748.68	2890.61	3865.16	1.97337	1.33286	1.27787	1.91357	1.47555	1.97303
FGSG_01214	conserved hypothetical protein	6646	13399.1	8184.77	12617.3	13033.2	11809	15740.9	2.01612	1.23153	1.89848	1.96106	1.77686	2.36847
FGSG_01215	related to endoplasmic reticulum translocation complex chain SEC66	5077	6536.97	5311.7	6865.9	6455.8	5398.49	5312.18	1.28757	1.04623	1.35235	1.27158	1.06332	1.04632
FGSG_01216	probable nuclear protein localization factor and ER translocation component NPL4	5556	5500.83	5137.04	5449.64	5520.93	5995.48	4699.79	0.99007	0.924593	0.980857	0.993688	1.0791	0.845895
FGSG_01217	probable carbamoyl-phosphate synthase (glutamine-hydrolyzing) arginine-specific large chain	21047	13725.3	17507	18510.9	14707.9	19251.8	10652.1	0.652127	0.831807	0.879503	0.698814	0.914707	0.506112
FGSG_01218	conserved hypothetical protein	2080	1501.7	1570.85	1697.68	1535.95	1935.16	503.68	0.721971	0.755216	0.816192	0.738437	0.930365	0.242154
FGSG_01219	conserved hypothetical protein	6165	5257.45	4789.92	6194.34	5470.45	5556.16	3686.39	0.85279	0.776954	1.00476	0.88734	0.901242	0.597955
FGSG_01220	probable DNA-directed RNA polymerase II chain Rpb7	5066	4010.25	4091.28	4795.36	3917.3	4957.83	3153.73	0.791601	0.807596	0.946577	0.773253	0.978648	0.622529
FGSG_01221	related to 2,4-dihydroxyhept-2-ene-1,7-dioic acid aldolase	3123	1944.03	2218.64	2533.82	1756.19	2685.77	1411.99	0.622488	0.710419	0.811342	0.562341	0.859997	0.452126
FGSG_01222	related to zinc-binding protein	3858	4006.21	3334.04	3462.41	4013.65	3614.27	3142.86	1.03842	0.864189	0.897462	1.04034	0.936825	0.814635
FGSG_01223	conserved hypothetical protein	720	692.78	759.45	778.23	791.49	769.48	1420.45	0.962194	1.05479	1.08088	1.09929	1.06872	1.97285
FGSG_01224	conserved hypothetical protein	2194	2686.29	4443.92	2723.8	2692.21	3397.3	7016.47	1.22438	2.02549	1.24148	1.22708	1.54845	3.19803
FGSG_01225	related to AUT4 - breakdown of autophagic vesicles inside the vacuole	2726	2312.63	2511.59	2721.77	2343.5	2743.72	2586.03	0.84836	0.921346	0.998448	0.859685	1.0065	0.948654
FGSG_01226	probable F-actin capping protein beta subunit	3212	3477.03	3652.41	3077.36	3606.44	3328.58	3366.31	1.08251	1.13711	0.958082	1.1228	1.0363	1.04804
FGSG_01227	conserved hypothetical protein	3499	3204.36	4016.11	3334.4	3247.4	3468.73	3691.23	0.915793	1.14779	0.952958	0.928094	0.991349	1.05494
FGSG_01228	conserved hypothetical protein	10848	9367.68	9513.52	11033.4	9018.39	10609.7	5791.7	0.86354	0.876984	1.01709	0.831341	0.97803	0.533896
FGSG_01229	conserved hypothetical protein	2844	2602.47	2567.97	2780.7	2673.86	2819.18	1991.76	0.915074	0.902943	0.977743	0.940176	0.991273	0.700338
FGSG_01230	probable phosphate transport protein, mitochondrial	8795	11366.2	9447.19	9755.3	10698.9	9259.37	8494.89	1.29235	1.07415	1.10919	1.21647	1.0528	0.965877
FGSG_01231	related to carbon catabolite repression protein CREB	11424	9227.3	10268.5	11575.9	9680.26	11399.4	8046.78	0.807712	0.898857	1.0133	0.847362	0.997843	0.704375
FGSG_01232	related to YOS1, subunit of the Yip1p-Yif1p Complex, required for Transport between the ER and th	765	981.61	865.57	903.19	1020.91	679.19	847.92	1.28315	1.13146	1.18064	1.33452	0.88783	1.10839
FGSG_01233	related to ECM39 protein, involved in cell wall biogenesis and architecture	15454	14519.1	11924.5	16835.6	14405.1	14594.5	8360.82	0.939504	0.771613	1.0894	0.932128	0.944385	0.541013
FGSG_01234	probable adenylate cyclase	22470	16097.5	18450	22484.3	16740.6	23287.9	21765.7	0.716401	0.821095	1.00064	0.745019	1.0364	0.968655
FGSG_01235	probable alpha-glucosidase (maltase)	3133	1798.6	2873.07	3104.79	1985.61	3503.76	4197.32	0.574082	0.917035	0.990996	0.633773	1.11834	1.33971
FGSG_01236	probable 20S proteasome subunit beta3	3838	5021.14	4122.23	3507.11	5042.59	3843.36	4307.24	1.30827	1.07406	0.913786	1.31386	1.0014	1.12226
FGSG_01237	conserved hypothetical protein	23035	18794.9	17167.7	24575.2	19245.8	22603.3	14432.7	0.81593	0.745286	1.06686	0.835503	0.98126	0.626557
FGSG_01238	probable 60S ribosomal protein L36	5348	4482.87	5024.28	4367.64	4467.9	4821.72	3220.16	0.838233	0.939469	0.816687	0.835434	0.901593	0.602124
FGSG_01239	conserved hypothetical protein	797	1790.52	1300.01	1348.19	1780.28	843.6	2025.58	2.24657	1.63113	1.69158	2.23373	1.05847	2.54151
FGSG_01240	related to triacylglycerol lipase	6488	6840.95	5310.59	6966.48	6631.3	6480.62	5908.86	1.0544	0.818525	1.07375	1.02209	0.998863	0.910737
FGSG_01241	probable 14-3-3-like protein	28458	31111.5	29231.5	29149.1	30731.6	29664.8	27924.6	1.09324	1.02718	1.02428	1.07989	1.0424	0.981255
FGSG_01242	conserved hypothetical protein	7628	8230.55	6464.68	8705.81	8085.81	7519.62	4655.1	1.07899	0.847493	1.1413	1.06002	0.985792	0.610265
FGSG_01243	related to phosphatidylinositol phosphate phosphatase	15252	12065.1	12340.2	16198.6	12042.1	14787.2	10048.2	0.791049	0.809085	1.06206	0.789543	0.969527	0.658812
FGSG_01244	related to PRP39 - pre-mRNA splicing factor	9910	8136.63	8720.91	9916.84	8104.16	10394	7468.21	0.821052	0.880011	1.00069	0.817776	1.04884	0.753603
FGSG_01245	probable cytochrome-c peroxidase precursor	2544	2679.22	2454.1	2220.9	2787.42	2459.37	1868.56	1.05315	0.964662	0.872995	1.09568	0.966733	0.734497
FGSG_01247	conserved hypothetical protein	2920	3061.97	3112.95	2950.36	3149.9	2917.56	3078.84	1.04862	1.06608	1.0104	1.07873	0.999164	1.0544
FGSG_01248	probable THS1 - threonyl tRNA synthetase, cytosolic	13133	11688.4	12663	11643	11999.7	12159.4	10478.2	0.890002	0.964208	0.886543	0.913704	0.925867	0.797853
FGSG_01249	related to vegetatible incompatibility protein het-e-1	11289	13886.9	17965.8	13531.6	14479.7	12993.6	29842.6	1.23013	1.59144	1.19866	1.28264	1.15099	2.64351
FGSG_01250	related to beta-glucosidase	1392	1542.09	2506.06	1409.14	1412.06	1297.74	2078.73	1.10782	1.80033	1.01231	1.01441	0.932284	1.49334
FGSG_01251	related to RNA-splicing regulatory protein phosphatase CYT-4, mitochondrial	1336	1026.04	1160.72	1377.65	1017.47	1208.8	1312.95	0.767994	0.868802	1.03118	0.761579	0.90479	0.982747
FGSG_01253	hypothetical protein	54	81.8	46.43	41.65	78	60.64	64.02	1.51481	0.859815	0.771296	1.44444	1.12296	1.18556
FGSG_01254	probable protein MET-10	907	952.32	1118.72	853.41	965.85	830.12	1062.92	1.04997	1.23343	0.940915	1.06488	0.915237	1.17191
FGSG_01255	conserved hypothetical protein	4377	3595.18	3205.81	4301.6	3588.09	3965.99	2368.62	0.82138	0.732422	0.982774	0.81976	0.906098	0.541151
FGSG_01256	conserved hypothetical protein	1598	1788.5	1733.35	1430.48	1782.57	1522.79	1488.09	1.11921	1.0847	0.895169	1.1155	0.952935	0.93122
FGSG_01257	related to exocyst complex 100 kDa component	3755	3179.11	3659.05	3360.81	3327.7	3437.73	3367.52	0.846634	0.974447	0.895023	0.886205	0.915507	0.89681
FGSG_01261	conserved hypothetical protein	10703	7379.22	8116.23	11362.6	7370.03	10322.6	5312.18	0.689453	0.758314	1.06162	0.688595	0.964461	0.496326
FGSG_01263	conserved hypothetical protein	2291	3240.72	2657.51	2429.17	3171.69	2381.21	2653.67	1.41454	1.15998	1.06031	1.38441	1.03938	1.1583
FGSG_01264	conserved hypothetical protein	8390	7185.32	6914.6	8730.19	7412.47	8268.88	5054.9	0.856415	0.824148	1.04055	0.883489	0.985564	0.602491
FGSG_01265	probable calcium P-type ATPase NCA-1	15375	13010.3	15008.7	14354.6	12494.1	14124.2	11897.4	0.8462	0.976177	0.933631	0.812622	0.918648	0.773817
FGSG_01266	conserved hypothetical protein	10790	7545.85	7342.41	9577.51	7600.59	9121.92	5897.99	0.699337	0.680483	0.887628	0.704411	0.845405	0.546616
FGSG_01267	conserved hypothetical protein	21806	17809.3	17816.6	17722.5	17005.5	20285.5	15524.6	0.816715	0.817049	0.812735	0.779856	0.930269	0.711944
FGSG_01268	conserved hypothetical protein	519	592.8	665.48	531.35	640.07	493.22	838.26	1.1422	1.28224	1.0238	1.23328	0.950328	1.61514
FGSG_01269	conserved hypothetical protein	99	159.56	67.43	83.31	145.68	82.2	74.89	1.61172	0.681111	0.841515	1.47152	0.830303	0.756465
FGSG_01270	conserved hypothetical protein	1433	1489.58	1366.34	1555.44	1564.63	1543	1137.81	1.03948	0.953482	1.08544	1.09186	1.07676	0.794006
FGSG_01271	related to protein kinase CDC5	3518	2901.39	3231.24	3205.37	2876.89	3323.19	2345.67	0.824727	0.918488	0.911134	0.817763	0.944625	0.666762
FGSG_01273	related to protoplast regeneration and killer toxin resistance protein	3179	3539.64	4383.12	3565.02	3731.47	3378.44	5547.71	1.11344	1.37877	1.12143	1.17379	1.06274	1.74511
FGSG_01274	conserved hypothetical protein	1319	1476.45	1414.98	1484.33	1557.74	1495.84	1699.46	1.11937	1.07277	1.12534	1.181	1.13407	1.28845
FGSG_01276	conserved hypothetical protein	1537	1971.29	1682.5	1528.01	1970.69	1621.16	1447.02	1.28256	1.09466	0.994151	1.28217	1.05476	0.941457
FGSG_01277	conserved hypothetical protein	11706	12549.8	13430.1	12893.6	12792.3	12513.8	16009	1.07208	1.14729	1.10145	1.0928	1.06901	1.36759
FGSG_01278	probable RPL33B - ribosomal protein L35a.e.c15	9150	7420.62	7997.95	7153.41	7858.69	7832.26	5280.77	0.810997	0.874093	0.781793	0.858873	0.855985	0.577133
FGSG_01279	probable ZWF1 - glucose-6-phosphate dehydrogenase	14492	14331.2	14757.8	13182.1	14975.2	12916.8	14360.3	0.988908	1.01834	0.909616	1.03334	0.891303	0.99091
FGSG_01280	related to RNA polymerase II mediator complex protein pmc1	4392	3959.75	4282.52	4384.91	3940.24	4488.86	4634.57	0.901582	0.975073	0.998386	0.89714	1.02205	1.05523
FGSG_01281	related to HEM14 - protoporphyrinogen oxidase, mitochondrial	2420	2711.54	2332.5	2195.5	2616.5	2346.17	1875.81	1.12047	0.963843	0.907231	1.0812	0.969492	0.775128
FGSG_01282	related to nuclear poly(A)-binding protein	7103	6870.24	7078.21	7727.43	7044.26	10092.2	7113.1	0.967231	0.99651	1.08791	0.99173	1.42083	1.00142
FGSG_01283	related to beta-hexosaminidase precursor	8530	7909.41	13680	10548.8	8131.69	10027.5	20550.6	0.927246	1.60375	1.23667	0.953305	1.17556	2.40921
FGSG_01284	related to n-alkane-inducible cytochrome P450	501	771.55	511.82	570.97	702.02	452.79	677.61	1.54002	1.0216	1.13966	1.40124	0.903772	1.35251
FGSG_01285	related to ARO8 - aromatic amino acid aminotransferase I	6267	8180.05	6953.29	6525.55	7389.53	6291.95	7145.71	1.30526	1.10951	1.04126	1.17912	1.00398	1.14021
FGSG_01286	conserved hypothetical protein	1411	1232.06	1705.71	1390.86	1383.39	1445.98	1501.37	0.873182	1.20887	0.985726	0.980432	1.02479	1.06405
FGSG_01287	conserved hypothetical protein	4181	3970.86	3987.37	3811.9	4192.6	4099.4	3772.15	0.949739	0.953688	0.91172	1.00277	0.980483	0.902212
FGSG_01289	related to diacylglycerol pyrophosphate phosphatase	4613	4394	5554.9	4134.98	4475.93	4533.33	6140.77	0.952525	1.20418	0.896375	0.970286	0.982729	1.33119
FGSG_01290	probable mitochondrial ribosomal protein L2 of the large subunit	2522	2049.05	2398.83	2367.2	2270.08	2351.57	1976.06	0.81247	0.951162	0.93862	0.900111	0.932423	0.783529
FGSG_01291	probable G2/mitotic-specific cyclin B	10675	9895.85	9333.33	10497	10209.1	10477.6	7128.8	0.927012	0.874317	0.983322	0.956353	0.981508	0.667803
FGSG_01292	related to AAC-rich mRNA clone AAC3 protein	1280	1241.15	1254.69	1414.22	1242.29	1304.48	1100.36	0.969648	0.980227	1.10486	0.970539	1.01913	0.859656
FGSG_01293	related to Zn(II)2Cys6 transcriptional activator	8408	6752.08	7731.53	8033.24	6899.72	8353.78	7239.92	0.803054	0.919544	0.955428	0.820614	0.993551	0.861075
FGSG_01294	conserved hypothetical protein	690	434.25	590.31	642.09	486.36	667.06	698.14	0.629348	0.855522	0.930565	0.70487	0.966754	1.0118
FGSG_01295	related to high-affinity phosphate permease, phosphate-repressible	1316	1207.82	1643.81	1772.86	1187.23	1202.06	2774.46	0.917796	1.2491	1.34716	0.90215	0.913419	2.10825
FGSG_01296	conserved hypothetical protein	1142	809.93	1124.24	1195.79	839.67	1075.39	1601.62	0.709221	0.984448	1.0471	0.735263	0.941673	1.40247
FGSG_01298	related to transcriptional repressor	2489	1385.56	1789.73	2015.68	1475.15	2251.84	1432.52	0.556673	0.719056	0.809835	0.592668	0.904717	0.57554
FGSG_01299	related to U4/U6 snRNP-associated 61 kDa protein	6160	5562.44	6110.94	5930.19	5902.9	6495.44	6234.98	0.902994	0.992036	0.962693	0.958263	1.05445	1.01217
FGSG_01300	probable crooked neck protein CGI-201 (short form)	3587	3106.4	3397.05	3437.01	3256.58	3444.47	3121.12	0.866016	0.947045	0.958185	0.907884	0.960265	0.87012
FGSG_01301	conserved hypothetical protein	7079	5385.71	6419.36	6525.55	5706.75	7182.72	6272.43	0.760801	0.906817	0.921818	0.806152	1.01465	0.886062
FGSG_01302	related to mfs-multidrug-resistance transporter	297	313.06	207.83	391.15	310.86	249.31	227.08	1.05407	0.699764	1.317	1.04667	0.839428	0.764579
FGSG_01304	conserved hypothetical protein	6797	6658.16	7330.25	7302.76	6837.78	7976.45	9668.93	0.979573	1.07845	1.07441	1.006	1.17353	1.42253
FGSG_01306	related to SFT2 - suppressor of sed5 ts mutants	3097	3313.43	3023.41	3126.13	3260.02	3046.93	3083.67	1.06988	0.976238	1.00941	1.05264	0.983833	0.995696
FGSG_01307	related to GATA transcription factor	14976	14150.5	14087.9	15123.7	13706.5	15264.3	14132	0.944878	0.940697	1.00986	0.915233	1.01925	0.943642
FGSG_01308	conserved hypothetical protein	2202	2049.05	2244.07	2172.13	2063.61	2072.61	2540.13	0.93054	1.01911	0.986435	0.937153	0.94124	1.15356
FGSG_01309	related to ethanolamine kinase	9820	7864.97	7833.23	10281.6	8068.6	10244.5	5552.54	0.800913	0.797681	1.047	0.82165	1.04323	0.565432
FGSG_01310	conserved hypothetical protein	2593	2479.26	3083.11	2774.6	2462.79	2885.22	4333.81	0.956136	1.18901	1.07003	0.949784	1.1127	1.67135
FGSG_01311	related to inorganic phosphate permease	6659	7149.97	5783.73	7418.58	7390.68	6711.06	4901.5	1.07373	0.868558	1.11407	1.10988	1.00782	0.736071
FGSG_01312	related to RIM15 - protein kinase involved in expression of meiotic genes	15287	10941.1	14332.2	14183.9	10538.3	15245.4	17474.1	0.715711	0.937541	0.927841	0.689362	0.99728	1.14307
FGSG_01313	related to AP-1-like transcription factor	5257	5881.56	5454.3	5933.24	5804.26	5566.94	5934.23	1.11881	1.03753	1.12864	1.1041	1.05896	1.12882
FGSG_01314	probable eukaryotic translation initiation factor 3 subunit 7 homolog	10010	10331.1	10804.7	9296.09	10507.3	9756.64	9516.74	1.03208	1.07939	0.92868	1.04968	0.974689	0.950723
FGSG_01315	conserved hypothetical protein	5249	6381.45	5221.05	6300	6641.63	5568.29	4327.77	1.21575	0.994675	1.20023	1.26531	1.06083	0.824494
FGSG_01316	related to ABP1 - actin-binding protein	14294	13270.9	14107.8	13485.9	13185.8	14434.2	14623.6	0.928423	0.986972	0.943468	0.922467	1.00981	1.02306
FGSG_01317	probable glutaredoxin	4717	4512.16	4441.71	4342.24	4706.49	4999.6	3629.63	0.956574	0.941639	0.920551	0.997772	1.05991	0.769478
FGSG_01318	conserved hypothetical protein	3089	3199.31	3593.82	3574.17	3424.05	3180.34	3723.84	1.03571	1.16343	1.15706	1.10847	1.02957	1.20552
FGSG_01319	conserved hypothetical protein	6061	3618.41	4191.87	5714.81	3853.06	5564.25	3270.89	0.596999	0.691614	0.942882	0.635714	0.918042	0.539662
FGSG_01320	probable dynamin-related GTPase DNM1	5870	6026.98	6140.79	6890.28	6521.18	5767.74	6545.4	1.02674	1.04613	1.17381	1.11093	0.982579	1.11506
FGSG_01321	related to hydrogen peroxide-inducible protein hic-5	7870	7664	6349.72	8470.11	7841.48	7355.21	4813.33	0.973825	0.806826	1.07625	0.996376	0.934588	0.611605
FGSG_01322	related to ubiquitin-like protein modifier	10396	11089.5	10439.9	9872.14	11386	11239	9650.82	1.06671	1.00422	0.949609	1.09523	1.08109	0.928321
FGSG_01323	related to nuclear pore protein	6134	5903.78	5718.5	5729.03	5733.14	6864.68	5794.11	0.962468	0.932263	0.933979	0.934649	1.11912	0.944589
FGSG_01324	conserved hypothetical protein	1954	2057.13	1679.18	1916.11	1884.66	2067.22	1519.49	1.05278	0.859355	0.980609	0.964514	1.05794	0.777631
FGSG_01325	conserved hypothetical protein	12069	11329.9	10750.5	12725	11215.1	13538	9473.26	0.938759	0.890755	1.05435	0.929245	1.12172	0.784925
FGSG_01326	probable F-box protein involved in pathogenicity	4536	4171.83	5263.06	4489.55	4198.33	4693.7	5407.6	0.919716	1.16029	0.98976	0.925558	1.03477	1.19215
FGSG_01327	conserved hypothetical protein	4960	3063.99	3684.47	5334.84	3156.78	4932.22	3139.23	0.61774	0.742837	1.07557	0.636448	0.994399	0.632909
FGSG_01328	probable H+-ATPase V1 subunit c, vacuolar	8075	8205.3	7521.5	7600.44	8005.51	7977.8	6164.93	1.01614	0.931455	0.941231	0.991394	0.987963	0.763459
FGSG_01329	probable MET14 - ATP adenosine-5`-phosphosulfate 3`-phosphotransferase	3833	3231.63	3285.4	3952.11	3320.81	3739.59	2490.61	0.843107	0.857135	1.03107	0.866374	0.97563	0.649781
FGSG_01330	conserved hypothetical protein	945	1358.29	1479.09	1151.09	1437.3	1115.81	1437.36	1.43734	1.56517	1.21808	1.52095	1.18075	1.52102
FGSG_01331	conserved hypothetical protein	1984	3298.28	3022.31	2253.41	2950.31	2079.35	3488.31	1.66244	1.52334	1.13579	1.48705	1.04806	1.75822
FGSG_01332	related to MAK21 - protein required for 60S ribosomal subunit biogenesis	3514	4866.63	4097.91	4188.83	4898.06	4571.07	4366.42	1.38493	1.16617	1.19204	1.39387	1.30082	1.24258
FGSG_01333	related to E.coli prolyl-tRNA synthetase	1845	1796.58	1742.19	1758.64	1763.07	1598.26	1459.1	0.973756	0.944276	0.953192	0.955593	0.866266	0.79084
FGSG_01334	probable prefoldin subunit 5	589	600.88	580.36	556.75	664.16	525.56	454.16	1.02017	0.985331	0.945246	1.12761	0.892292	0.77107
FGSG_01335	conserved hypothetical protein	5039	7820.54	5318.33	6005.37	7663.68	6353.94	6213.24	1.552	1.05543	1.19178	1.52087	1.26095	1.23303
FGSG_01336	related to origin recognition protein Orc1p	1958	2102.58	1943.38	2132.51	2166.85	2343.48	1943.45	1.07384	0.992533	1.08913	1.10666	1.19687	0.992569
FGSG_01337	probable pleiotropic regulator 1 (PLRG1)	1478	1492.61	1495.68	1444.7	1543.98	1363.77	1538.82	1.00988	1.01196	0.97747	1.04464	0.922713	1.04115
FGSG_01338	related to 26s proteasome subunit p28	2236	2587.32	2124.68	2391.58	2610.77	2185.81	1887.89	1.15712	0.950215	1.06958	1.16761	0.977554	0.844316
FGSG_01339	related to transcription factor TMF	2542	2194.48	2778	2644.56	2428.38	2621.09	2564.29	0.863289	1.09284	1.04035	0.955303	1.03111	1.00877
FGSG_01340	conserved hypothetical protein	1806	1442.11	1789.73	1653.99	1513.01	1857	1549.69	0.798511	0.990991	0.915831	0.837769	1.02824	0.858079
FGSG_01341	related to calcineurin responsive zinc-finger protein	4274	4852.49	5801.41	4657.19	4969.18	4712.56	6499.5	1.13535	1.35737	1.08966	1.16265	1.10261	1.52071
FGSG_01342	probable alternative oxidase precursor, mitochondrial	2233	3234.66	3597.14	3233.82	3307.05	2156.16	4082.57	1.44857	1.6109	1.4482	1.48099	0.965589	1.82829
FGSG_01343	conserved hypothetical protein	5177	6136.05	6151.84	5430.34	6318.15	6769	7119.14	1.18525	1.1883	1.04894	1.22043	1.30751	1.37515
FGSG_01345	conserved hypothetical protein	3490	4149.61	3706.58	3859.65	4027.42	3643.92	3586.14	1.189	1.06206	1.10592	1.15399	1.0441	1.02755
FGSG_01346	probable enolase (2-phosphoglycerate dehydratase)	85233	79609.1	69667.8	85698.7	80580.5	80356.1	55646.2	0.934017	0.817381	1.00546	0.945414	0.942782	0.652872
FGSG_01347	probable mitotic checkpoint serine/threonine protein kinase	3200	2690.33	2943.82	3032.66	2692.21	3424.26	1938.62	0.840728	0.919944	0.947706	0.841316	1.07008	0.605819
FGSG_01348	probable AP endonuclease	2701	2538.85	2474	2917.85	2710.56	2641.3	2160.86	0.939967	0.915957	1.08029	1.00354	0.977897	0.800022
FGSG_01349	related to diacylglycerol acyltransferase type 2a	8366	9019.27	7901.77	7733.53	9068.86	7914.46	6585.26	1.07809	0.94451	0.9244	1.08401	0.946027	0.787146
FGSG_01350	related to zinc finger protein crol gamma	9222	7822.56	8035.53	8997.39	7975.69	8910.34	5847.26	0.84825	0.871344	0.975644	0.864855	0.966205	0.634056
FGSG_01351	related to cell cycle regulation and aging protein	3474	3420.47	5177.94	3541.66	3405.7	3300.28	5203.47	0.984591	1.49048	1.01948	0.98034	0.949994	1.49783
FGSG_01352	related to MFS amino acid transporter	3014	2104.6	2498.32	2939.19	2377.91	2642.65	2964.09	0.698275	0.828905	0.975179	0.788955	0.876792	0.983441
FGSG_01353	probable histone deacetylase HosA	4273	3713.34	3562.87	4488.54	4005.62	4065.71	2735.81	0.869024	0.83381	1.05044	0.937426	0.951488	0.640255
FGSG_01354	conserved hypothetical protein	12322	10921.9	10722.9	12699.6	10806.7	12210.6	8062.48	0.886373	0.870223	1.03064	0.877025	0.990961	0.654316
FGSG_01355	conserved hypothetical protein	698	679.65	709.7	731.5	708.9	637.42	626.88	0.973711	1.01676	1.04799	1.01562	0.913209	0.898109
FGSG_01356	related to acetate non-utilizing protein 9, mitochondrial precursor	478	500.9	464.29	561.83	527.66	487.83	402.22	1.04791	0.971318	1.17538	1.10389	1.02056	0.841464
FGSG_01357	related to ATP-dependent RNA helicase	1374	1635	1465.83	1395.94	1633.45	1351.64	1430.11	1.18996	1.06683	1.01597	1.18883	0.983726	1.04084
FGSG_01358	related to SNARE transport protein	5977	5845.2	7424.22	6196.37	6017.61	6688.15	7720.65	0.977949	1.24213	1.0367	1.00679	1.11898	1.29173
FGSG_01359	related to GTP-binding protein	2861	3682.03	3969.68	3340.49	3919.59	3425.6	3700.89	1.28697	1.38751	1.1676	1.37001	1.19734	1.29357
FGSG_01360	conserved hypothetical protein	2838	2476.23	2496.11	2869.09	2584.38	2948.55	2049.74	0.872526	0.879531	1.01095	0.910634	1.03895	0.722248
FGSG_01361	probable uroporphyrinogen decarboxylase	3438	3230.62	3241.19	3235.85	3305.9	3382.48	2561.88	0.93968	0.942755	0.941201	0.961576	0.983851	0.745166
FGSG_01363	conserved hypothetical protein	888	880.62	924.16	960.09	871.79	879.98	1224.77	0.991689	1.04072	1.08118	0.981745	0.990968	1.37925
FGSG_01364	related to voltage gated Ca2+ channel	7274	5601.82	6752.1	7129.03	5756.08	7205.63	8044.36	0.770115	0.928251	0.98007	0.791323	0.990601	1.10591
FGSG_01365	conserved hypothetical protein	2287	1874.34	2217.54	2344.85	1994.78	2468.81	2084.77	0.819563	0.969628	1.0253	0.872226	1.0795	0.911574
FGSG_01366	related to mating type 1-2 protein	6298	1935.95	5362.55	4590.13	1962.66	8799.84	3764.91	0.307391	0.851469	0.728823	0.311632	1.39724	0.597795
FGSG_01368	conserved hypothetical protein	1312	1373.44	1505.63	1373.59	1402.89	1309.87	1683.76	1.04683	1.14758	1.04694	1.06928	0.998377	1.28335
FGSG_01369	probable protein phosphatase 2A regulatory B subunit	9622	9511.08	9922.54	9132.51	9766.29	9997.86	9665.31	0.988472	1.03123	0.949128	1.015	1.03906	1.0045
FGSG_01370	related to UDP N-acetylglucosamine transporter (MNN2)	3267	3454.81	3618.14	3501.02	3715.41	3108.92	3705.72	1.05749	1.10748	1.07163	1.13725	0.951613	1.13429
FGSG_01371	probable AMP deaminase	6596	4631.32	7200.92	5769.67	4868.23	6141.02	5906.44	0.702141	1.09171	0.874723	0.738058	0.931022	0.895458
FGSG_01372	related to cytoskeleton assembly control protein SLA1	7376	5760.37	7467.33	7128.01	6041.7	7185.41	7901.83	0.780961	1.01238	0.966379	0.819102	0.974161	1.07129
FGSG_01373	conserved hypothetical protein	2060	2433.82	2288.29	2210.74	2383.64	2216.8	2471.29	1.18147	1.11082	1.07317	1.15711	1.07612	1.19966
FGSG_01374	conserved hypothetical protein	3912	2487.34	2895.18	4066.91	2586.68	3785.41	2381.9	0.635823	0.740077	1.0396	0.661217	0.967641	0.60887
FGSG_01375	related to mitochondrial substrate carrier	3861	3467.94	3212.44	4277.22	3437.82	3767.89	2715.27	0.898197	0.832023	1.1078	0.890396	0.975884	0.703256
FGSG_01376	conserved hypothetical protein	7555	5179.69	8059.85	7328.16	5425.72	8154.34	6869.11	0.685598	1.06682	0.969975	0.718163	1.07933	0.909214
FGSG_01377	related to prefoldin subunit 1	1477	1267.4	1410.56	1505.66	1347.83	1416.33	1123.31	0.858091	0.955017	1.0194	0.912546	0.958923	0.760535
FGSG_01378	related to transcription factor nirA	3999	2893.32	3399.27	3502.03	3089.1	3851.45	3275.72	0.723511	0.85003	0.875726	0.772468	0.963103	0.819135
FGSG_01379	conserved hypothetical protein	49789	25133	42827.4	38083.5	25695.9	50363.9	37709.4	0.50479	0.860179	0.764897	0.516095	1.01155	0.757385
FGSG_01381	related to snRNP protein SMX3	2678	2988.24	2600.02	2442.38	3124.66	2460.72	2501.48	1.11585	0.970881	0.912016	1.16679	0.918865	0.934085
FGSG_01382	probable AVT3 - involved in amino acid efflux from the vacuole	8828	8750.64	6564.17	8032.22	8667.38	8029.01	7686.83	0.991237	0.743563	0.909857	0.981806	0.909494	0.870733
FGSG_01383	conserved hypothetical protein	1836	1578.45	1574.16	1663.14	1599.04	1750.53	1062.92	0.859722	0.857386	0.90585	0.870937	0.953448	0.578932
FGSG_01384	conserved hypothetical protein	7603	6457.19	5827.94	8307.55	6728.81	7429.33	3420.66	0.849295	0.766532	1.09267	0.88502	0.977158	0.449909
FGSG_01385	conserved hypothetical protein	1040	663.49	961.74	818.87	688.25	959.49	564.07	0.637971	0.92475	0.787375	0.661779	0.922587	0.542375
FGSG_01386	related to GTP-binding protein	4923	5834.1	5385.76	5473.01	6212.62	4852.71	5362.91	1.18507	1.094	1.11172	1.26196	0.985722	1.08936
FGSG_01387	conserved hypothetical protein	2680	2557.02	2866.44	2711.61	2707.12	2552.36	2530.47	0.954112	1.06957	1.01179	1.01012	0.952373	0.944205
FGSG_01388	related to ABC transporter protein	8457	8076.04	8996.17	7631.93	8312.93	7733.89	10142.4	0.954953	1.06375	0.902439	0.982964	0.914496	1.19929
FGSG_01389	related to transaminase type I	805	2227.8	1283.43	902.18	2244.85	769.48	1262.22	2.76745	1.59432	1.12072	2.78863	0.955876	1.56798
FGSG_01390	related to acid proteinase PEPI precursor	24799	23543.4	21441.3	28826	22949.8	24248.8	17307.5	0.949369	0.864605	1.16239	0.92543	0.977812	0.697909
FGSG_01391	probable translation elongation factor EF-G, mitochondrial	2758	3218.5	3231.24	3233.82	3374.73	2592.79	3394.09	1.16697	1.17159	1.17252	1.22361	0.940098	1.23063
FGSG_01392	related to 3-isopropylmalate dehydrogenase	2512	1909.69	2248.49	2151.82	1961.52	2187.16	1245.31	0.760227	0.8951	0.856616	0.78086	0.870685	0.495744
FGSG_01393	conserved hypothetical protein	3431	4035.49	4002.84	3584.33	4098.54	3309.71	4101.9	1.17618	1.16667	1.04469	1.19456	0.964649	1.19554
FGSG_01394	related to MRPS8 - mitochondrial ribosomal protein, small subunit	1732	1555.22	1756.56	1708.85	1671.3	1521.44	1682.55	0.897933	1.01418	0.986634	0.964954	0.87843	0.971449
FGSG_01395	related to BNA4 - kynurenine 3-mono oxygenase	1215	1128.04	1143.04	1251.67	1229.68	1021.48	870.87	0.928428	0.940774	1.03018	1.01208	0.840724	0.716765
FGSG_01396	conserved hypothetical protein	113	129.27	112.76	122.93	137.65	115.89	183.6	1.14398	0.997876	1.08788	1.21814	1.02558	1.62478
FGSG_01397	probable MAP1 - methionine aminopeptidase, isoform 1	6325	5955.28	6607.29	6026.71	5876.52	6618.07	6587.68	0.941546	1.04463	0.95284	0.929094	1.04634	1.04153
FGSG_01398	probable ERV14 - ER-derived Vesicles	4422	4913.08	4548.94	4303.63	5040.3	4165.44	4048.75	1.11105	1.02871	0.973232	1.13982	0.941981	0.915592
FGSG_01399	probable CDC40 - cell division control protein	2677	2709.52	2728.26	2715.68	2656.65	2879.82	2738.22	1.01215	1.01915	1.01445	0.992398	1.07576	1.02287
FGSG_01400	conserved hypothetical protein	1775	2793.34	1711.24	2331.64	2563.74	2875.78	3752.83	1.57371	0.964079	1.3136	1.44436	1.62016	2.11427
FGSG_01401	conserved hypothetical protein	495	457.48	674.33	555.73	426.72	626.63	507.3	0.924202	1.36228	1.12269	0.862061	1.26592	1.02485
FGSG_01402	conserved hypothetical protein	1006	849.31	1154.09	1107.4	867.2	1202.06	1312.95	0.844245	1.14721	1.1008	0.862028	1.19489	1.30512
FGSG_01404	conserved hypothetical protein	5253	6268.35	6044.61	6238.03	6313.56	5832.42	8023.83	1.19329	1.1507	1.18752	1.2019	1.1103	1.52748
FGSG_01405	conserved hypothetical protein	1875	1735.99	1872.64	1824.67	1631.16	1739.75	1898.76	0.925861	0.998741	0.973157	0.869952	0.927867	1.01267
FGSG_01407	related to TRK1 - Potassium transporter I	2593	3611.34	3059.89	2887.37	3387.35	2561.79	3563.19	1.39273	1.18006	1.11352	1.30634	0.987964	1.37416
FGSG_01408	probable FK506-binding protein (FKBP)	2858	3487.13	3411.43	2986.94	3356.37	3111.61	3151.31	1.22013	1.19364	1.04512	1.17438	1.08874	1.10263
FGSG_01409	conserved hypothetical protein	5254	4468.73	4833.04	4859.36	4622.76	5269.12	4498.08	0.850539	0.919878	0.924888	0.879855	1.00288	0.856125
FGSG_01410	probable myosin I heavy chain	18545	13299.1	15250.8	19153	14039.2	17358.5	13569.1	0.717129	0.822368	1.03278	0.757034	0.936018	0.731686
FGSG_01411	conserved hypothetical protein	2203	2698.41	2565.75	2478.96	2778.24	2243.76	2490.61	1.22488	1.16466	1.12527	1.26112	1.0185	1.13055
FGSG_01412	related to capsular associated protein	3575	2934.72	3555.13	3496.95	2966.36	3630.44	3392.88	0.820901	0.994442	0.978168	0.829751	1.01551	0.949057
FGSG_01414	related to USO1 - intracellular protein transport protein	7587	9765.57	9375.34	8364.44	9657.32	8530.32	12956.7	1.28715	1.23571	1.10247	1.27288	1.12433	1.70775
FGSG_01415	conserved hypothetical protein	5254	4878.75	4669.43	5207.84	4876.26	5393.1	3803.56	0.928578	0.888738	0.991214	0.928104	1.02648	0.723936
FGSG_01417	probable O-acetylhomoserine (thiol)-lyase	6388	3798.17	5882.11	4119.74	3995.3	7392.94	2857.8	0.594579	0.920806	0.644919	0.625438	1.15732	0.44737
FGSG_01418	conserved hypothetical protein	1863	2403.52	1683.6	1773.88	2220.76	1764.01	1671.68	1.29013	0.903704	0.952163	1.19203	0.946865	0.897305
FGSG_01419	related to long-chain-fatty-acid CoA ligase FAA2	8904	8949.59	9239.37	8292.31	8694.91	8264.84	7643.35	1.00512	1.03767	0.931302	0.976517	0.928217	0.858418
FGSG_01420	conserved hypothetical protein	6522	4806.03	5208.89	6888.25	4735.17	6068.25	4686.5	0.736895	0.798665	1.05616	0.72603	0.930428	0.718568
FGSG_01421	probable mitochondrial substrate carrier	7819	9310.11	11437	8397.97	9594.23	9010.07	10321.2	1.1907	1.46272	1.07405	1.22704	1.15233	1.32001
FGSG_01422	probable mitochondrial citrate synthase	25304	18501.1	23559.4	20249.2	18512.8	23785.2	16062.1	0.731152	0.931054	0.800238	0.731616	0.939977	0.634767
FGSG_01424	related to RNA binding protein NRD1 protein	5861	5966.39	5567.06	5640.64	5777.87	5887.67	5039.2	1.01798	0.949848	0.962402	0.985816	1.00455	0.859785
FGSG_01425	probable H+-transporting ATPase	246402	217371	241761	272997	214991	236355	198633	0.882182	0.981166	1.10793	0.872523	0.959223	0.806133
FGSG_01426	related to myocyte-specific enhancer factor 2d	1369	946.26	1004.86	1452.83	933.73	1223.62	692.1	0.691205	0.73401	1.06123	0.682053	0.893806	0.505551
FGSG_01428	conserved hypothetical protein	7211	6246.13	5913.06	8097.25	6323.89	6600.55	4417.15	0.866195	0.820006	1.1229	0.876978	0.915345	0.612557
FGSG_01429	related to nucleoporin-interacting protein NIC96	7629	7081.3	7939.36	7768.07	6970.84	7622.04	7899.42	0.928208	1.04068	1.01823	0.913729	0.999088	1.03545
FGSG_01430	related to D-ribulokinase	7663	7062.11	9798.73	8079.97	7115.37	8082.92	11640.2	0.921586	1.27871	1.05441	0.928536	1.0548	1.51901
FGSG_01431	conserved hypothetical protein	5619	5153.43	5661.02	6394.49	5397.04	5926.75	6759.2	0.917144	1.00748	1.13801	0.960498	1.05477	1.20292
FGSG_01432	related to VTC2 - putative polyphosphate synthetase	15773	13819.2	14116.6	16418	13954.3	15458.3	10919.1	0.876133	0.894986	1.04089	0.884695	0.980051	0.692263
FGSG_01433	probable glutamate synthase (NADPH)	28019	19351.4	27153.2	22354.3	19251.5	29751	27029.5	0.690652	0.9691	0.797826	0.687089	1.06182	0.964686
FGSG_01434	conserved hypothetical protein	2211	4063.77	2593.39	2942.24	4005.62	3250.42	2916.99	1.83798	1.17295	1.33073	1.81168	1.47011	1.31931
FGSG_01435	related to ER-Golgi SNARE complex subunit BET1 protein	3424	4428.34	3848.08	3554.86	4471.34	3639.87	5806.19	1.29332	1.12386	1.03822	1.30588	1.06305	1.69573
FGSG_01436	conserved hypothetical protein	13759	15477.5	12727.1	13424	15330.8	14628.2	12341.9	1.1249	0.925	0.975649	1.11424	1.06317	0.897008
FGSG_01437	conserved hypothetical protein	3472	3764.85	3681.16	3338.46	3708.53	3437.73	3318	1.08435	1.06024	0.961538	1.06812	0.99013	0.955645
FGSG_01438	probable negative regulatory factor PREG	3029	3870.88	3601.56	3376.05	3754.41	3360.92	4028.22	1.27794	1.18903	1.11458	1.23949	1.10958	1.32988
FGSG_01439	conserved hypothetical protein	9918	8386.07	9024.91	9875.19	8552.67	10976.2	8139.78	0.84554	0.909953	0.995684	0.862338	1.1067	0.820708
FGSG_01440	related to putative plasma membrane protein YRO2	4526	7740.76	5405.66	5932.22	7828.86	4149.27	10155.7	1.71029	1.19436	1.3107	1.72975	0.916763	2.24386
FGSG_01442	related to SPT23 - suppressor of TY retrotransposon	19530	13221.4	17027.3	19162.1	13107.8	18788.3	16040.4	0.676978	0.871853	0.981164	0.67116	0.96202	0.821322
FGSG_01443	related to ribonuclease H1	2579	2213.66	2708.36	2645.57	2572.91	2758.54	2486.99	0.85834	1.05016	1.02581	0.997639	1.06962	0.964323
FGSG_01444	conserved hypothetical protein	4003	5096.88	3871.29	4228.45	5013.91	4498.29	3722.63	1.27327	0.967097	1.05632	1.25254	1.12373	0.92996
FGSG_01445	related to 6-phosphofructo-2-kinase	20571	17820.4	16940	20499.1	17828	19928.3	11268.1	0.866287	0.823487	0.996507	0.866657	0.968758	0.547768
FGSG_01446	probable SOF1 protein	1678	2026.84	1788.62	1812.48	2149.64	1575.35	1810.59	1.20789	1.06592	1.08014	1.28107	0.938826	1.07902
FGSG_01447	probable DNA-directed RNA polymerase II chain RPB3	4847	5155.45	5103.87	4906.1	4921	4895.84	4922.04	1.06364	1.053	1.01219	1.01527	1.01008	1.01548
FGSG_01449	related to mitochondrial phenylalanyl-tRNA synthetase (MSF1)	1854	1745.08	2098.15	1811.47	1786.01	1786.92	1810.59	0.941251	1.13169	0.97706	0.963328	0.963819	0.976586
FGSG_01450	related to inhibitor of calcineurin	6389	6626.85	5802.52	7386.07	6666.86	6926.67	5691.45	1.03723	0.908205	1.15606	1.04349	1.08416	0.89082
FGSG_01452	conserved hypothetical protein	854	1024.02	960.64	917.42	1040.41	839.56	950.59	1.19909	1.12487	1.07426	1.21828	0.983091	1.1131
FGSG_01453	related to short-chain dehydrogenase/reductase	1875	2883.22	2663.03	2216.84	2798.89	2292.27	3129.57	1.53772	1.42028	1.18231	1.49274	1.22254	1.6691
FGSG_01454	conserved hypothetical protein	4180	5301.89	6536.54	3661.54	5464.72	4894.49	7299.11	1.26839	1.56377	0.875967	1.30735	1.17093	1.7462
FGSG_01455	conserved hypothetical protein	1901	1899.59	1929.01	1696.66	2038.37	1874.51	1651.15	0.999258	1.01473	0.892509	1.07226	0.986065	0.868569
FGSG_01457	conserved hypothetical protein	2777	3196.28	2946.03	3093.62	3359.81	3247.72	2961.68	1.15098	1.06087	1.11402	1.20987	1.16951	1.0665
FGSG_01458	conserved hypothetical protein	390	666.52	734.02	577.07	741.02	415.06	926.43	1.70903	1.8821	1.47967	1.90005	1.06426	2.37546
FGSG_01459	conserved hypothetical protein	408	504.94	549.41	565.89	550.6	561.95	832.22	1.2376	1.34659	1.38699	1.34951	1.37733	2.03975
FGSG_01460	conserved hypothetical protein	38	60.59	37.59	49.78	75.71	37.73	61.6	1.59447	0.989211	1.31	1.99237	0.992895	1.62105
FGSG_01461	conserved hypothetical protein	925	914.95	1271.27	1031.21	1055.32	1034.96	1548.48	0.989135	1.37435	1.11482	1.14089	1.11888	1.67403
FGSG_01462	conserved hypothetical protein	1113	1702.66	1784.2	1264.88	1635.74	1280.22	1901.17	1.52979	1.60305	1.13646	1.46967	1.15024	1.70815
FGSG_01463	related to nucleolar phosphoprotein	4452	4192.03	4452.76	4580.99	4480.52	4664.05	4205.78	0.941606	1.00017	1.02897	1.00641	1.04763	0.944695
FGSG_01464	probable cell shape control protein phosphatase ppe1	7492	8228.53	7766.91	7751.82	8116.78	7409.11	7214.56	1.09831	1.03669	1.03468	1.08339	0.988936	0.962968
FGSG_01465	conserved hypothetical protein	263	301.96	278.57	293.61	303.98	238.53	234.33	1.14814	1.0592	1.11639	1.15582	0.906958	0.890989
FGSG_01466	related to secretory protein SSP120	1142	1293.66	1350.86	1123.66	1329.47	1129.29	1273.09	1.1328	1.18289	0.98394	1.16416	0.98887	1.11479
FGSG_01467	conserved hypothetical protein	380	456.47	432.23	440.93	512.75	423.15	433.62	1.20124	1.13745	1.16034	1.34934	1.11355	1.14111
FGSG_01468	conserved hypothetical protein	323	416.07	396.86	346.44	368.21	340.94	518.17	1.28814	1.22867	1.07257	1.13997	1.05554	1.60424
FGSG_01469	related to levodione reductase	1871	1718.82	2604.45	1800.29	1849.1	1836.78	1978.48	0.918664	1.39201	0.962207	0.988295	0.98171	1.05745
FGSG_01470	probable zinc finger protein ZPR1	3288	3868.86	3303.09	3131.21	3778.5	3009.19	2840.89	1.17666	1.00459	0.952314	1.14918	0.915204	0.864018
FGSG_01472	conserved hypothetical protein	3512	2373.23	2714.99	3598.55	2429.53	3348.79	2276.82	0.675749	0.773061	1.02464	0.69178	0.953528	0.648297
FGSG_01474	hypothetical protein	71	83.82	60.8	55.88	88.33	79.51	64.02	1.18056	0.856338	0.787042	1.24408	1.11986	0.90169
FGSG_01475	probable AAA protease IAP-1 (mitochondrial intermembrane space)	25022	16675.2	18189.1	24656.5	16965.4	24275.7	14229.8	0.666421	0.726925	0.985392	0.678019	0.970174	0.568692
FGSG_01476	related to aldehyde reductase II	1411	1130.06	1306.64	1005.81	1194.12	1445.98	949.38	0.800893	0.926038	0.712835	0.846293	1.02479	0.672842
FGSG_01477	conserved hypothetical protein	1227	2770.11	2395.51	1725.11	2762.18	1359.73	2927.86	2.25763	1.95233	1.40596	2.25117	1.10817	2.38619
FGSG_01478	conserved hypothetical protein	7579	7858.91	6873.7	8206.97	7723.33	8177.25	5925.77	1.03693	0.90694	1.08286	1.01904	1.07894	0.781867
FGSG_01479	conserved hypothetical protein	1481	1014.93	1145.25	1448.77	1058.76	1414.98	945.76	0.6853	0.773295	0.978238	0.714895	0.955422	0.638596
FGSG_01480	related to tRNA-splicing endonuclease	1730	1493.62	1528.84	1711.9	1595.6	1785.57	1519.49	0.863364	0.883723	0.989538	0.922312	1.03212	0.878318
FGSG_01481	conserved hypothetical protein	4749	4462.67	4530.14	4981.28	4420.87	4832.5	4408.7	0.939707	0.953915	1.04891	0.930905	1.01758	0.928343
FGSG_01482	conserved hypothetical protein	2509	1603.69	2277.23	2375.33	1690.8	2723.5	1680.14	0.639175	0.907625	0.946724	0.673894	1.08549	0.669645
FGSG_01484	probable sugar transporter	1127	1006.85	1137.51	1014.95	1008.29	1034.96	950.59	0.89339	1.00933	0.900577	0.894667	0.918332	0.843469
FGSG_01485	related to P.ciliare possible apospory-associated protein	5362	5550.32	5097.24	4800.44	5619.57	5785.25	4725.16	1.03512	0.950623	0.89527	1.04804	1.07894	0.881231
FGSG_01486	related to DAHP synthase class II	4009	2737.79	3841.45	3339.48	2751.86	4519.86	2978.59	0.682911	0.958207	0.832996	0.686421	1.12743	0.742976
FGSG_01487	conserved hypothetical protein	1878	2023.81	2034.03	2037.01	1986.75	2079.35	1896.34	1.07764	1.08308	1.08467	1.05791	1.10722	1.00977
FGSG_01488	conserved hypothetical protein	4748	3881.99	4337.79	4493.62	3864.53	4926.83	2788.95	0.817605	0.913604	0.946424	0.813928	1.03766	0.587395
FGSG_01489	conserved hypothetical protein	2897	2802.43	2701.73	3024.53	2804.63	2935.08	2543.76	0.967356	0.932596	1.04402	0.968115	1.01314	0.878067
FGSG_01490	related to ribonuclease P protein subunit p30	3721	4179.91	3807.18	4347.32	4191.45	4426.87	3420.66	1.12333	1.02316	1.16832	1.12643	1.1897	0.919285
FGSG_01491	conserved hypothetical protein	3006	3963.79	2855.38	3386.21	3830.12	2774.71	3148.9	1.31863	0.949894	1.12648	1.27416	0.923057	1.04754
FGSG_01493	conserved hypothetical protein	2196	3264.95	2328.08	2242.24	3186.6	2156.16	2634.35	1.48677	1.06015	1.02106	1.45109	0.981858	1.19961
FGSG_01495	conserved hypothetical protein	3792	3070.05	3108.53	3996.81	3140.72	4045.5	1988.14	0.809612	0.81976	1.05401	0.828249	1.06685	0.524299
FGSG_01496	probable choline-sulfatase	11679	5142.33	9614.12	10021.5	5227.27	14618.8	4796.42	0.440306	0.823197	0.858077	0.447579	1.25172	0.410688
FGSG_01497	related to Ras GTPase-activating-like protein IQGAP1	7048	4610.12	5295.12	6843.54	4720.26	7213.71	4440.1	0.654103	0.751294	0.97099	0.66973	1.02351	0.62998
FGSG_01498	related to RMD1 - protein required for meiotic division	2471	2144.99	1998.66	2398.69	2264.35	2378.52	1732.07	0.868066	0.808847	0.970737	0.91637	0.962574	0.700959
FGSG_01499	related to glucose-6-phosphate/phosphate translocator	11862	9708.01	11850.5	11356.5	9440.52	12594.7	12291.2	0.818413	0.999026	0.957382	0.795862	1.06177	1.03618
FGSG_01502	related to ACOB protein	2199	2100.56	2072.72	1959.8	2163.4	1999.84	1692.21	0.955234	0.942574	0.891223	0.983811	0.909432	0.769536
FGSG_01503	conserved hypothetical protein	5317	6468.3	5334.91	5701.6	6401.89	5437.57	6807.51	1.21653	1.00337	1.07233	1.20404	1.02268	1.28033
FGSG_01504	probable ribosomal protein L31.e.A, cytosolic	11118	9045.52	10479.7	8829.76	9083.77	10270.1	6385.97	0.813592	0.942588	0.794186	0.817033	0.923734	0.574381
FGSG_01505	probable ubiquitin-conjugating enzyme E2-C	8258	9323.24	7808.91	9053.27	9587.35	8515.5	6319.53	1.12899	0.945618	1.0963	1.16098	1.03118	0.765262
FGSG_01506	related to protein kinase chk1	3005	2461.09	2778	3416.69	2282.7	4034.72	4385.75	0.818998	0.924459	1.137	0.759634	1.34267	1.45948
FGSG_01508	related to thiosulfate sulfurtransferases	3901	5263.51	3589.4	5033.09	5437.19	3572.49	3760.07	1.34927	0.920123	1.29021	1.39379	0.915788	0.963873
FGSG_01509	probable 40S ribosomal protein S5	27020	18359.7	24305.6	19961.7	19240.1	23701.6	14333.7	0.679485	0.89954	0.738775	0.712068	0.877188	0.530485
FGSG_01510	related to telomere length regulator protein rif1	7856	5534.16	5972.76	8758.64	5616.13	7607.21	4641.81	0.70445	0.76028	1.1149	0.714884	0.968331	0.590862
FGSG_01511	conserved hypothetical protein	6092	6033.04	5191.2	6453.41	5939.61	5832.42	3365.1	0.990322	0.852134	1.05933	0.974985	0.95739	0.55238
FGSG_01512	conserved hypothetical protein	1955	1790.52	1429.35	2079.68	1777.98	1951.33	879.32	0.915867	0.731125	1.06377	0.909453	0.998123	0.44978
FGSG_01513	conserved hypothetical protein	349	315.08	361.48	414.51	338.39	357.11	163.06	0.902808	1.03576	1.18771	0.969599	1.02324	0.467221
FGSG_01514	conserved hypothetical protein	265	784.68	536.14	363.72	682.52	401.59	648.62	2.96106	2.02317	1.37253	2.57555	1.51543	2.44762
FGSG_01515	conserved hypothetical protein	1243	2244.97	1659.28	1709.87	2172.58	1231.71	2235.75	1.80609	1.3349	1.3756	1.74785	0.990917	1.79867
FGSG_01516	probable 60S large subunit ribosomal protein	16848	12949.7	16053.4	13099.9	13259.2	14170	9029.98	0.768621	0.952836	0.777532	0.786988	0.841051	0.535967
FGSG_01517	hypothetical protein	280	609.97	254.25	431.79	571.25	256.04	317.67	2.17846	0.908036	1.54211	2.04018	0.914429	1.13454
FGSG_01518	conserved hypothetical protein	97	210.06	46.43	86.36	184.68	68.73	150.98	2.16557	0.47866	0.890309	1.90392	0.708557	1.55649
FGSG_01519	related to CSN12 - signalosome component	4041	3430.57	3584.98	3949.06	3518.11	3875.7	3119.91	0.848941	0.887152	0.977248	0.870604	0.959094	0.772064
FGSG_01520	conserved hypothetical protein	236	1004.83	192.35	619.74	1164.29	207.53	635.34	4.25775	0.815042	2.62602	4.93343	0.879364	2.69212
FGSG_01521	conserved hypothetical protein	546	663.49	676.54	529.32	664.16	645.5	600.31	1.21518	1.23908	0.969451	1.21641	1.18223	1.09947
FGSG_01522	probable regulatory subunit of protein phosphatase-1	2836	4152.64	3114.06	2961.54	4058.39	2781.45	3146.48	1.46426	1.09805	1.04427	1.43103	0.980765	1.10948
FGSG_01523	probable D-xylose reductase	4419	4491.96	4449.44	3649.35	4291.25	3914.78	4314.48	1.01651	1.00689	0.825832	0.971091	0.885897	0.976348
FGSG_01525	conserved hypothetical protein	418	501.91	463.18	481.57	441.63	478.4	684.86	1.20074	1.10809	1.15208	1.05653	1.1445	1.63842
FGSG_01526	related to peroxisomal ABC transporter 1	6442	5067.59	7679.58	5864.15	5044.88	6747.44	6768.86	0.786649	1.19211	0.9103	0.783123	1.04741	1.05074
FGSG_01527	related to plasma membrane phosphatase required for sodium stress response	6767	5939.12	6212.64	6797.83	6214.91	6382.24	6628.75	0.877659	0.918079	1.00456	0.918414	0.943142	0.97957
FGSG_01528	probable translocon subunit	4482	4881.78	4820.88	4371.7	5079.3	4534.68	5246.95	1.0892	1.07561	0.97539	1.13327	1.01175	1.17067
FGSG_01529	hypothetical protein	214	245.4	141.5	215.38	204.18	252	233.12	1.14673	0.661215	1.00645	0.954112	1.17757	1.08935
FGSG_01530	related to sterol glucosyltransferase	9352	9308.09	9044.81	9599.86	9517.37	10585.4	12075	0.995305	0.967152	1.0265	1.01768	1.13189	1.29117
FGSG_01531	probable CYB2 - lactate dehydrogenase cytochrome b2	568	475.66	352.64	600.44	461.13	495.92	347.86	0.83743	0.620845	1.05711	0.811849	0.873099	0.61243
FGSG_01532	conserved hypothetical protein	530	259.54	361.48	651.23	270.71	439.32	665.53	0.489698	0.682038	1.22874	0.510774	0.828906	1.25572
FGSG_01533	conserved hypothetical protein	7576	7005.56	7068.26	7407.41	7188.79	7847.08	6385.97	0.924704	0.93298	0.977747	0.94889	1.03578	0.842921
FGSG_01534	related to GTP-binding protein rab2	3991	4367.75	4162.03	3941.95	4467.9	4203.17	4080.16	1.0944	1.04285	0.98771	1.11949	1.05316	1.02234
FGSG_01535	probable dolichyl-phosphate-mannose--protein mannosyltransferase	9656	10548.2	10607.9	9733.97	10580.7	9365.83	11514.5	1.0924	1.09858	1.00807	1.09577	0.969949	1.19248
FGSG_01536	conserved hypothetical protein	6544	5941.14	6075.56	6179.1	5926.99	6646.37	6215.66	0.907876	0.928417	0.944239	0.905714	1.01564	0.949826
FGSG_01537	conserved hypothetical protein	362	364.57	261.99	350.51	334.95	340.94	243.99	1.0071	0.723729	0.96826	0.925276	0.941823	0.674006
FGSG_01538	conserved hypothetical protein	1537	1167.43	1119.82	1537.16	1148.23	1549.74	814.1	0.759551	0.728575	1.0001	0.747059	1.00829	0.529668
FGSG_01539	conserved hypothetical protein	2030	1762.25	1819.57	2001.45	1725.22	1924.38	1686.18	0.868103	0.89634	0.985936	0.849862	0.94797	0.830631
FGSG_01540	conserved hypothetical protein	1603	2050.06	1747.72	1747.46	2087.7	1675.07	1803.34	1.27889	1.09028	1.09012	1.30237	1.04496	1.12498
FGSG_01541	related to ribosomal protein L3 precursor, mitochondrial	3097	2784.25	3159.38	3075.33	2872.3	3002.46	2967.72	0.899015	1.02014	0.993003	0.927446	0.969474	0.958256
FGSG_01542	conserved hypothetical protein	1107	1361.32	1210.47	1161.25	1391.42	1036.31	1218.73	1.22974	1.09347	1.04901	1.25693	0.936143	1.10093
FGSG_01543	conserved hypothetical protein	5548	4790.89	4442.81	6199.42	4962.29	6004.91	3217.74	0.863535	0.800795	1.11742	0.894429	1.08236	0.579982
FGSG_01544	probable Nuc-2 protein	5946	5627.07	6951.08	6857.77	5711.34	5630.28	7945.32	0.946362	1.16903	1.15334	0.960535	0.946902	1.33625
FGSG_01545	related to ATP-dependent RNA helicase	1230	1220.95	1308.86	1124.67	1203.29	1130.64	1006.15	0.992642	1.06411	0.914366	0.978285	0.91922	0.818008
FGSG_01546	conserved hypothetical protein	326	426.17	402.38	392.16	415.25	389.46	485.56	1.30727	1.23429	1.20294	1.27377	1.19466	1.48945
FGSG_01547	conserved hypothetical protein	2748	4894.9	3395.95	2813.21	4391.05	2921.6	4802.46	1.78126	1.23579	1.02373	1.59791	1.06317	1.74762
FGSG_01548	conserved hypothetical protein	4781	3847.66	4469.34	4045.58	4034.3	4599.36	4547.6	0.804781	0.934813	0.846179	0.843819	0.962008	0.951182
FGSG_01550	conserved hypothetical protein	356	342.35	326.11	338.32	332.65	405.63	241.57	0.961657	0.916039	0.950337	0.93441	1.13941	0.678567
FGSG_01551	conserved hypothetical protein	1284	1534.01	1294.48	1218.14	1566.92	1308.52	1004.94	1.19471	1.00816	0.948707	1.22034	1.0191	0.782664
FGSG_01552	probable VPS29 - involved in vacuolar protein sorting	2792	2363.13	2449.68	2756.31	2381.35	2727.55	2291.31	0.846393	0.877393	0.987217	0.852919	0.976916	0.82067
FGSG_01553	conserved hypothetical protein	3813	4345.53	4267.05	3937.88	4374.99	3443.12	4214.23	1.13966	1.11908	1.03275	1.14739	0.902995	1.10523
FGSG_01554	conserved hypothetical protein	5859	4755.54	5915.27	6089.7	5099.94	5841.85	6046.56	0.811664	1.0096	1.03938	0.870445	0.997073	1.03201
FGSG_01555	related to bZIP transcription factor	17625	20906.6	26253.4	21541.5	21454	19382.6	31697.9	1.18619	1.48955	1.22221	1.21725	1.09972	1.79846
FGSG_01556	related to heterokaryon incompatibility protein het-6	478	553.42	530.62	498.84	618.28	520.17	555.62	1.15778	1.11008	1.0436	1.29347	1.08822	1.16238
FGSG_01557	conserved hypothetical protein	12182	6540	8829.25	8467.06	6755.19	10888.6	11106.3	0.536858	0.724778	0.695047	0.554522	0.893829	0.911697
FGSG_01558	related to regulator of deoxyribodipyrimidine photo-lyase PHR1	14894	10027.1	11276.7	14593.3	10335.2	15219.8	9911.71	0.673233	0.757132	0.979813	0.69392	1.02188	0.665483
FGSG_01559	related to CDC5 - protein kinase involved in regulation of DNA replication	4716	6922.75	6076.67	5903.78	6783.87	4734.12	6683.1	1.46793	1.28852	1.25186	1.43848	1.00384	1.41711
FGSG_01560	probable BNA3 - Arylformamidase	1966	1764.27	2225.28	2063.43	1874.34	2067.22	1813	0.897391	1.13188	1.04956	0.953377	1.05149	0.922177
FGSG_01561	probable xanthine dehydrogenase	23768	16613.6	22793.3	20763.3	16636.2	24934.7	23751.4	0.69899	0.958992	0.873582	0.699941	1.04909	0.999302
FGSG_01562	related to transcription factors	5003	4630.32	4574.36	6374.17	4929.03	4775.9	4408.7	0.925509	0.914323	1.27407	0.985215	0.954607	0.881211
FGSG_01563	conserved hypothetical protein	2363	2704.47	2258.44	2503.34	2586.68	2338.09	2413.31	1.14451	0.955751	1.05939	1.09466	0.989458	1.02129
FGSG_01564	probable ZFR1 regulator of fumonisin biosynthesis	1762	1775.37	1912.43	1962.85	1662.13	1823.31	2395.19	1.00759	1.08537	1.11399	0.94332	1.0348	1.35936
FGSG_01565	conserved hypothetical protein	219	168.65	155.87	232.66	164.03	230.44	237.95	0.770091	0.711735	1.06237	0.748995	1.05224	1.08653
FGSG_01566	hypothetical protein	199	141.38	180.19	228.59	169.77	257.39	217.42	0.710452	0.905477	1.14869	0.853116	1.29342	1.09256
FGSG_01567	probable AAH1 - adenosine deaminase	428	315.08	412.33	456.17	362.48	433.93	368.4	0.736168	0.963388	1.06582	0.846916	1.01386	0.860748
FGSG_01569	related to calpain	47260	86632.8	52876	101354	97387.6	180880	136119	1.83311	1.11883	2.1446	2.06068	3.82735	2.88021
FGSG_01570	conserved hypothetical protein	460	538.27	455.45	541.51	517.34	513.44	805.64	1.17015	0.990109	1.1772	1.12465	1.11617	1.75139
FGSG_01571	related to hormone-sensitive lipase	2540	999.78	2294.92	2237.16	1078.26	3189.77	1699.46	0.393614	0.903512	0.880772	0.424512	1.25581	0.669079
FGSG_01572	probable glutamate decarboxylase	8542	9988.76	10247.5	8247.61	10107	7798.57	10611.1	1.16937	1.19967	0.965536	1.18321	0.912968	1.24222
FGSG_01573	probable acetylornithine aminotransferase precursor	968	1264.37	1116.51	1077.94	1309.97	915.02	921.6	1.30617	1.15342	1.11357	1.35327	0.945269	0.952066
FGSG_01574	conserved hypothetical protein	9653	9355.56	8478.82	9558.2	9628.64	9787.63	7361.92	0.969187	0.878361	0.990179	0.997476	1.01395	0.762656
FGSG_01575	related to eukaryotic translation initiation factor EIF-2B subunit 3	3335	3667.9	3442.38	3321.19	3650.03	3804.28	3156.14	1.09982	1.0322	0.995859	1.09446	1.14071	0.946369
FGSG_01576	related to zinc finger protein odd-paired-like (opl)	467	263.58	334.95	463.28	322.33	421.8	461.4	0.564411	0.717238	0.992034	0.690214	0.903212	0.988009
FGSG_01577	conserved hypothetical protein	1142	1094.71	1008.17	1186.65	1096.61	1133.33	1181.29	0.95859	0.882811	1.0391	0.960254	0.992408	1.0344
FGSG_01578	conserved hypothetical protein	268	546.35	315.05	331.2	503.57	270.87	509.72	2.03862	1.17556	1.23582	1.87899	1.01071	1.90194
FGSG_01579	conserved hypothetical protein	3635	2133.88	2304.87	2240.2	2317.11	3201.9	1472.38	0.587037	0.634077	0.616286	0.637444	0.880853	0.405056
FGSG_01580	related to Y.lipolytica GPR1 protein and Fun34p	2866	4353.61	2233.01	3602.61	4740.91	3866.27	2767.21	1.51905	0.779138	1.25702	1.65419	1.34901	0.96553
FGSG_01581	related to 3-oxoadipate enol-lactonase I	2982	2471.18	2542.54	2998.11	2558	2932.38	2156.03	0.828699	0.852629	1.0054	0.857814	0.98336	0.723015
FGSG_01582	related to RNA-directed RNA polymerase (RdRP)	8159	6176.45	5775.99	7996.67	6404.18	7894.25	6393.21	0.757011	0.707929	0.980104	0.784922	0.967551	0.783578
FGSG_01583	conserved hypothetical protein	1051	853.35	1270.16	2007.55	1117.26	1618.47	1839.57	0.811941	1.20853	1.91013	1.06304	1.53993	1.7503
FGSG_01586	related to oxidoreductase	356	507.97	343.8	392.16	474.89	319.38	422.75	1.42688	0.96573	1.10157	1.33396	0.897135	1.1875
FGSG_01587	conserved hypothetical protein	307	463.54	407.91	385.05	445.07	367.9	380.48	1.5099	1.3287	1.25423	1.44974	1.19837	1.23935
FGSG_01588	conserved hypothetical protein	3028	1682.47	3991.79	2924.97	1600.19	3316.45	3128.36	0.555637	1.31829	0.965974	0.528464	1.09526	1.03314
FGSG_01589	conserved hypothetical protein	178	278.73	263.1	244.85	276.45	185.97	421.54	1.5659	1.47809	1.37556	1.55309	1.04478	2.3682
FGSG_01590	conserved hypothetical protein	638	619.06	651.11	703.05	657.28	679.19	622.05	0.970313	1.02055	1.10196	1.03022	1.06456	0.975
FGSG_01591	probable mitochondrial phosphate transport protein MIR1	6449	7829.63	7368.94	8151.09	8588.23	5721.92	6864.28	1.21408	1.14265	1.26393	1.33171	0.887257	1.06439
FGSG_01592	related to SDA1 protein, required for normal organization of the actin cytoskeleton	2139	2393.42	2367.88	2294.05	2615.36	2051.05	1848.03	1.11894	1.107	1.07249	1.2227	0.958883	0.863969
FGSG_01593	related to glucose/galactose transporter	4381	3112.46	3504.28	4432.66	3074.19	4130.4	3105.41	0.710445	0.799881	1.01179	0.70171	0.942798	0.708836
FGSG_01595	conserved hypothetical protein	74	72.71	107.23	82.29	74.56	88.94	68.85	0.982568	1.44905	1.11203	1.00757	1.20189	0.930405
FGSG_01597	conserved hypothetical protein	54	52.51	60.8	56.89	44.74	68.73	43.48	0.972407	1.12593	1.05352	0.828519	1.27278	0.805185
FGSG_01599	conserved hypothetical protein	1494815	598922	911801	879189	593819	1.0707e+06	372117	0.400667	0.609976	0.588159	0.397252	0.716274	0.248938
FGSG_01602	conserved hypothetical protein	7130	9036.44	6864.86	8275.04	9494.43	8473.72	7160.21	1.26738	0.962813	1.16059	1.33162	1.18846	1.00424
FGSG_01603	probable triacylglycerol lipase V precursor	1298	1310.83	1460.3	1384.76	1094.32	1282.92	2060.61	1.00988	1.12504	1.06684	0.843082	0.988382	1.58753
FGSG_01604	related to (AAP1) - alanine/arginine aminopeptidase	14132	13981.8	13467.7	12628.5	13144.5	13069	13237	0.989374	0.952995	0.893607	0.93012	0.924783	0.936666
FGSG_01605	probable 26S protease subunit RPT6	8445	9700.94	8262.15	8008.86	9675.67	8324.14	7072.03	1.14872	0.978348	0.948355	1.14573	0.985689	0.837422
FGSG_01606	related to calcium permease Vcx1p	8275	6907.6	6319.87	7238.76	6786.16	7624.73	4378.5	0.834755	0.763731	0.874775	0.82008	0.921418	0.529124
FGSG_01607	probable pectin lyase precursor	68	78.77	59.69	97.53	71.12	67.38	57.98	1.15838	0.877794	1.43426	1.04588	0.990882	0.852647
FGSG_01608	conserved hypothetical protein	293	260.55	268.62	273.29	260.39	307.25	309.21	0.889249	0.916792	0.93273	0.888703	1.04863	1.05532
FGSG_01609	conserved hypothetical protein	822	1078.56	950.69	943.83	1082.85	823.38	1146.26	1.31212	1.15656	1.14821	1.31734	1.00168	1.39448
FGSG_01610	conserved hypothetical protein	2235	2261.13	2007.5	2423.08	2375.62	2137.3	2282.86	1.01169	0.89821	1.08415	1.06292	0.956286	1.02141
FGSG_01611	conserved hypothetical protein	282	415.06	323.9	370.83	462.28	334.21	367.19	1.47184	1.14858	1.315	1.63929	1.18514	1.30209
FGSG_01612	related to vacuolar protein sorting PEP5 protein	4012	4001.16	3558.45	3750.95	4106.57	3836.62	3636.87	0.997298	0.886952	0.934933	1.02357	0.956286	0.906498
FGSG_01613	conserved hypothetical protein	7612	9249.52	8315.21	8544.27	9253.54	7911.77	9731.74	1.21512	1.09238	1.12247	1.21565	1.03938	1.27847
FGSG_01614	related to dna mismatch repair homologue (hpms2)	2081	2811.52	2100.36	2368.22	2734.65	2189.85	2311.85	1.35104	1.0093	1.13802	1.3141	1.05231	1.11093
FGSG_01615	related to mannosylphosphorylation protein MNN4	9737	13156.8	11382.8	11584	13147.9	10391.4	13840.9	1.35121	1.16903	1.18969	1.3503	1.0672	1.42147
FGSG_01616	conserved hypothetical protein	123	145.42	141.5	139.19	149.12	117.24	150.98	1.18228	1.15041	1.13163	1.21236	0.953171	1.22748
FGSG_01617	hypothetical protein	46	96.95	34.27	44.7	55.06	39.08	57.98	2.10761	0.745	0.971739	1.19696	0.849565	1.26043
FGSG_01618	conserved hypothetical protein	1458	3002.38	1845	1601.16	2927.36	1596.91	2284.07	2.05925	1.26543	1.09819	2.00779	1.09527	1.56658
FGSG_01619	conserved hypothetical protein	4134	4421.27	3644.68	4292.45	3804.88	4328.5	3969.03	1.06949	0.881635	1.03833	0.920387	1.04705	0.960094
FGSG_01620	related to chaperone HLJ1	6630	6546.06	6642.66	7118.87	6563.63	6698.93	5782.03	0.987339	1.00191	1.07374	0.989989	1.0104	0.872101
FGSG_01621	probable cellulase precursor	507	1165.41	543.88	689.84	1059.91	479.75	786.32	2.29864	1.07274	1.36063	2.09055	0.946252	1.55093
FGSG_01622	conserved hypothetical protein	1000	841.23	878.83	973.3	825.9	853.03	821.35	0.84123	0.87883	0.9733	0.8259	0.85303	0.82135
FGSG_01623	related to transcription initiation factor TFIID	3174	3416.44	2967.03	3097.68	3503.2	3091.4	2651.26	1.07638	0.934792	0.975955	1.10372	0.973976	0.835306
FGSG_01624	probable ERD2 - ER lumen protein-retaining receptor	4037	4279.89	4442.81	3848.48	4173.1	3975.43	4633.36	1.06017	1.10052	0.953302	1.03371	0.984749	1.14772
FGSG_01626	conserved hypothetical protein	454	535.24	350.43	407.4	502.42	459.53	431.21	1.17894	0.771872	0.897357	1.10665	1.01218	0.949802
FGSG_01627	probable histone H2A F/Z family member HTZ1	4043	4685.86	3823.76	4347.32	4646.85	4332.54	3834.96	1.15901	0.945773	1.07527	1.14936	1.07162	0.948543
FGSG_01628	hypothetical protein	805	661.47	736.23	885.92	729.55	773.52	885.36	0.821702	0.914571	1.10052	0.906273	0.960894	1.09983
FGSG_01629	conserved hypothetical protein	5414	5375.61	5386.87	5435.42	5160.74	5182.88	6448.77	0.992909	0.994989	1.00396	0.953221	0.957311	1.19113
FGSG_01630	related to NADPH quinone oxidoreductase homolog PIG3	2535	3057.93	2742.63	2956.46	3084.51	2631.87	2954.43	1.20628	1.08191	1.16626	1.21677	1.03821	1.16546
FGSG_01631	conserved hypothetical protein	4135	5428.12	7160.01	5199.71	6037.11	4418.79	12236.9	1.31273	1.73156	1.25749	1.46	1.06863	2.95933
FGSG_01632	conserved hypothetical protein	17598	16450	18032.1	16758.3	16485.9	17545.8	24477.3	0.934765	1.02467	0.952287	0.936806	0.997032	1.39091
FGSG_01633	conserved hypothetical protein	3017	2931.69	2647.56	3228.74	2982.42	3483.55	2029.21	0.971724	0.877547	1.07018	0.988538	1.15464	0.672592
FGSG_01634	conserved hypothetical protein	3947	3744.65	3766.28	4175.62	3806.03	4476.73	2732.18	0.948733	0.954213	1.05792	0.964284	1.13421	0.692217
FGSG_01635	conserved hypothetical protein	466	419.1	384.7	546.59	442.78	421.8	275.39	0.899356	0.825536	1.17294	0.950172	0.90515	0.590966
FGSG_01636	conserved hypothetical protein	2396	3647.7	2879.7	2984.91	3742.94	2893.3	4704.62	1.52241	1.20188	1.24579	1.56216	1.20755	1.96353
FGSG_01638	related to pathway-specific nitrogen regulator	2142	2269.21	2516.01	2222.93	2290.73	2239.71	3125.95	1.05939	1.17461	1.03778	1.06944	1.04562	1.45936
FGSG_01639	related to enoyl-CoA hydratase/isomerase	1529	1566.33	1978.76	1578.81	1565.77	1761.32	1384.21	1.02441	1.29415	1.03258	1.02405	1.15194	0.905304
FGSG_01640	related to mannosyltransferase alg2	1885	2567.12	2091.52	1790.13	2673.86	2110.34	1931.37	1.36187	1.10956	0.949671	1.41849	1.11954	1.0246
FGSG_01642	related to lipoyltransferase	871	805.89	842.35	939.77	736.43	940.63	960.25	0.925247	0.967107	1.07896	0.845499	1.07994	1.10247
FGSG_01643	probable chorismate synthase/flavin reductase, NADPH-dependent	1561	1613.79	1447.04	1478.23	1648.36	1586.13	1103.99	1.03382	0.926996	0.946976	1.05596	1.0161	0.707233
FGSG_01644	related to MDR1 - Mac1p interacting protein	3705	3850.69	3604.88	4240.64	3819.8	4872.93	4843.53	1.03932	0.972977	1.14457	1.03099	1.31523	1.3073
FGSG_01645	conserved hypothetical protein	13260	9193.98	9963.44	13015.5	9591.93	12717.3	7695.29	0.693362	0.751391	0.981564	0.723373	0.959074	0.580339
FGSG_01648	conserved hypothetical protein	1548	1947.06	2597.81	2006.53	2141.61	1914.94	3454.49	1.25779	1.67817	1.29621	1.38347	1.23704	2.23158
FGSG_01649	related to GTPase Rho	468	847.29	312.84	694.92	899.32	446.06	452.95	1.81045	0.668462	1.48487	1.92162	0.95312	0.967842
FGSG_01650	related to PNG1 - protein with de-N-glycosylation function (N-glycanase)	1526	1391.62	1734.45	1596.08	1360.44	1600.95	1857.69	0.91194	1.1366	1.04592	0.891507	1.04912	1.21736
FGSG_01651	conserved hypothetical protein	337	487.77	445.5	382	489.81	361.16	590.64	1.44739	1.32196	1.13353	1.45344	1.07169	1.75264
FGSG_01652	conserved hypothetical protein	3611	4146.58	3294.25	3534.54	3947.12	3549.58	2134.29	1.14832	0.912282	0.978826	1.09308	0.982991	0.591052
FGSG_01653	related to RSM25 - mitochondrial ribosomal protein, small subunit	2944	2898.37	2992.46	2834.54	2917.04	2728.89	2377.07	0.984501	1.01646	0.962819	0.990842	0.926933	0.807429
FGSG_01654	conserved hypothetical protein	1372	1305.78	1367.44	1480.26	1375.36	1330.08	1235.64	0.951735	0.996676	1.07891	1.00245	0.969446	0.900612
FGSG_01655	related to cytochrome-c oxidase chain VIIc	3344	3862.8	3520.87	3866.77	3892.06	3292.19	3627.21	1.15514	1.05289	1.15633	1.16389	0.984507	1.08469
FGSG_01656	probable ATP dependent RNA helicase	4890	4668.69	4917.05	4940.64	4976.06	4984.78	4650.27	0.954742	1.00553	1.01036	1.0176	1.01938	0.950975
FGSG_01657	conserved hypothetical protein	4248	5540.22	4763.39	4942.67	5329.36	5701.7	4705.83	1.30419	1.12133	1.16353	1.25456	1.34221	1.10778
FGSG_01659	conserved hypothetical protein	604	927.07	1000.43	813.79	816.73	586.21	997.69	1.53488	1.65634	1.34733	1.3522	0.970546	1.6518
FGSG_01660	conserved hypothetical protein	742	715	1494.57	1969.96	1192.97	634.72	2278.03	0.963612	2.01425	2.65493	1.60778	0.855418	3.07012
FGSG_01661	related to E.coli dioxygenase	1944	1429.99	2365.67	1655.01	1474.01	3300.28	2339.63	0.735592	1.21691	0.851343	0.758236	1.69767	1.20351
FGSG_01662	related to permease	438	366.59	600.26	383.02	383.13	747.92	508.51	0.836963	1.37046	0.874475	0.874726	1.70758	1.16098
FGSG_01664	conserved hypothetical protein	109	90.89	111.65	128.01	69.97	118.59	78.51	0.833853	1.02431	1.1744	0.641927	1.08798	0.720275
FGSG_01665	probable signal transduction scaffold protein, essential for virulence and fertility	4929	4615.17	4868.41	5027	4867.09	5362.11	5118.92	0.93633	0.987707	1.01988	0.98744	1.08787	1.03853
FGSG_01666	related to DNA repair protein RAD14	2090	2600.45	2084.88	2301.16	2764.48	2145.38	2186.23	1.24423	0.99755	1.10103	1.32272	1.0265	1.04604
FGSG_01667	probable PHO88 (involved in phosphate transport)	5394	7209.56	6228.12	5590.86	7032.78	5309.55	5908.86	1.33659	1.15464	1.0365	1.30382	0.984344	1.09545
FGSG_01668	conserved hypothetical protein	380	404.96	410.12	412.48	433.6	385.41	588.23	1.06568	1.07926	1.08547	1.14105	1.01424	1.54797
FGSG_01669	conserved hypothetical protein	161	187.84	134.87	153.41	154.86	184.62	212.58	1.16671	0.837702	0.952857	0.961863	1.14671	1.32037
FGSG_01670	conserved hypothetical protein	1151	1318.91	1097.71	1157.18	1367.33	1200.71	953	1.14588	0.953701	1.00537	1.18795	1.04319	0.827976
FGSG_01671	conserved hypothetical protein	17458	14012.1	13070.9	18424.5	14581.8	15726.5	9707.59	0.802619	0.748704	1.05536	0.835248	0.90082	0.556054
FGSG_01672	probable thiamine repressed nmt1 protein	2506	1195.7	2426.47	1646.88	1385.68	2738.33	1529.15	0.477135	0.968264	0.657175	0.552945	1.09271	0.610196
FGSG_01673	conserved hypothetical protein	790	434.25	989.38	1034.25	622.87	598.34	1465.14	0.549684	1.25238	1.30918	0.788443	0.757392	1.85461
FGSG_01674	conserved hypothetical protein	3119	1299.72	5132.61	5193.62	2692.21	2428.38	8358.4	0.41671	1.64559	1.66516	0.863164	0.778576	2.67983
FGSG_01675	probable DIP5 - glutamate and aspartate permease	16483	12826.5	28793.7	19908.9	13448.4	19332.7	39150.4	0.778167	1.74687	1.20784	0.815898	1.17289	2.3752
FGSG_01676	hypothetical protein	417	754.38	501.88	469.38	802.96	586.21	870.87	1.80906	1.20355	1.12561	1.92556	1.40578	2.08842
FGSG_01677	conserved hypothetical protein	837	376.69	683.17	739.62	365.92	966.23	646.21	0.450048	0.816213	0.883656	0.43718	1.1544	0.772055
FGSG_01681	conserved hypothetical protein	495	233.28	644.48	627.87	243.18	506.7	496.43	0.471273	1.30198	1.26842	0.491273	1.02364	1.00289
FGSG_01685	related to beta-glucosidase	1022	460.51	582.57	606.53	422.13	780.26	642.58	0.450597	0.570029	0.593474	0.413043	0.763464	0.628748
FGSG_01686	related to alcohol dehydrogenase, class C	475	478.68	489.72	868.65	556.34	377.33	426.38	1.00775	1.03099	1.82874	1.17124	0.794379	0.897642
FGSG_01687	conserved hypothetical protein	660	605.93	679.85	665.46	680.22	700.75	692.1	0.918076	1.03008	1.00827	1.03064	1.06174	1.04864
FGSG_01688	conserved hypothetical protein	6580	7172.19	5721.82	4654.14	7653.36	6882.2	7471.83	1.09	0.869578	0.707316	1.16312	1.04593	1.13554
FGSG_01689	conserved hypothetical protein	257	245.4	237.67	286.5	225.98	246.61	218.62	0.954864	0.924786	1.11479	0.8793	0.959572	0.850661
FGSG_01690	related to kinesin-like protein	7845	7509.49	7521.5	9089.84	7453.77	10018.1	10678.7	0.957233	0.958764	1.15868	0.95013	1.277	1.36121
FGSG_01691	conserved hypothetical protein	1376	1342.13	1193.89	1386.79	1357	1459.45	1048.42	0.975385	0.867653	1.00784	0.986192	1.06065	0.761933
FGSG_01693	conserved hypothetical protein	3851	4346.54	5731.77	4750.66	4614.73	3642.57	13596.9	1.12868	1.48838	1.23362	1.19832	0.945876	3.53075
FGSG_01694	conserved hypothetical protein	677	709.95	823.56	819.88	699.72	679.19	1044.8	1.04867	1.21648	1.21105	1.03356	1.00323	1.54328
FGSG_01695	conserved hypothetical protein	500	456.47	511.82	400.29	463.42	467.62	996.49	0.91294	1.02364	0.80058	0.92684	0.93524	1.99298
FGSG_01698	related to nitrilases, putative pseudogene	3188	1997.55	2823.32	2691.29	2140.46	3118.35	2685.08	0.626584	0.885609	0.844194	0.671412	0.978152	0.842246
FGSG_01699	probable recombinational repair protein mus-23	2140	2233.86	1920.17	2346.88	2345.79	1970.19	1602.83	1.04386	0.897276	1.09667	1.09616	0.92065	0.748986
FGSG_01700	conserved hypothetical protein	173	170.67	185.72	257.04	191.56	245.26	292.3	0.986532	1.07353	1.48578	1.10728	1.41769	1.6896
FGSG_01701	conserved hypothetical protein	1613	2318.69	2357.93	2013.64	2083.11	1739.75	2356.54	1.4375	1.46183	1.24838	1.29145	1.07858	1.46097
FGSG_01702	conserved hypothetical protein	39987	40980.1	37753.4	48893.3	41233.2	44204	46802.2	1.02483	0.944142	1.22273	1.03116	1.10546	1.17044
FGSG_01703	probable pH-response regulator palA protein	3158	2929.67	2533.7	3333.38	3059.28	3280.06	3269.68	0.927698	0.802312	1.05554	0.96874	1.03865	1.03536
FGSG_01705	conserved hypothetical protein	2927	3843.62	4782.19	3605.66	4473.64	3234.24	7163.83	1.31316	1.63382	1.23186	1.5284	1.10497	2.4475
FGSG_01707	hypothetical protein	653	994.74	544.99	771.12	1105.79	588.9	529.04	1.52334	0.834594	1.18089	1.6934	0.901838	0.810168
FGSG_01710	conserved hypothetical protein	2507	2801.42	2291.6	3482.73	2775.95	3619.66	2646.43	1.11744	0.914081	1.3892	1.10728	1.44382	1.05562
FGSG_01711	related to cholinesterase	92	118.16	95.07	107.69	119.3	113.2	179.97	1.28435	1.03337	1.17054	1.29674	1.23043	1.9562
FGSG_01712	related to allantoate permease	2623	1441.1	1774.25	1738.32	1525.62	2425.68	1058.09	0.549409	0.67642	0.662722	0.581632	0.924773	0.403389
FGSG_01713	related to amidohydrolase family protein	293	366.59	420.07	400.29	365.92	334.21	471.07	1.25116	1.43369	1.36618	1.24887	1.14065	1.60775
FGSG_01714	conserved hypothetical protein	1145	576.64	810.3	772.13	653.84	1088.86	344.24	0.503616	0.707686	0.674349	0.571039	0.950969	0.300646
FGSG_01717	related to delta-5/delta-6 fatty acid desaturase	2186	3583.07	2787.95	2751.23	3340.31	2584.7	3348.19	1.6391	1.27537	1.25857	1.52805	1.18239	1.53165
FGSG_01718	conserved hypothetical protein	49	225.2	49.75	109.72	235.15	55.25	159.44	4.59592	1.01531	2.23918	4.79898	1.12755	3.25388
FGSG_01724	conserved hypothetical protein	1286	951.31	1032.49	1200.87	886.7	1150.85	664.32	0.739743	0.802869	0.933802	0.689502	0.894907	0.516579
FGSG_01725	related to heterokaryon incompatibility protein	831	717.02	778.24	792.45	763.96	743.88	994.07	0.86284	0.93651	0.95361	0.919326	0.895162	1.19623
FGSG_01727	conserved hypothetical protein	211	136.33	244.3	215.38	122.74	327.47	112.33	0.646114	1.15782	1.02076	0.581706	1.55199	0.53237
FGSG_01728	conserved hypothetical protein	86	166.63	101.7	88.39	192.71	59.29	299.55	1.93756	1.18256	1.02779	2.24081	0.689419	3.48314
FGSG_01730	probable D-amino-acid oxidase	225	628.15	264.2	232.66	620.57	293.78	130.45	2.79178	1.17422	1.03404	2.75809	1.30569	0.579778
FGSG_01731	related to transcription factor, SIN3 binding	2831	1555.22	2317.03	2215.82	1767.66	2282.84	3008.78	0.549354	0.818449	0.782699	0.624394	0.806372	1.0628
FGSG_01734	related to quinate transport protein	261	1245.19	519.56	302.76	1222.79	242.57	1186.12	4.77084	1.99065	1.16	4.68502	0.929387	4.54452
FGSG_01735	hypothetical protein	688	865.47	1324.33	856.46	887.84	714.23	2343.25	1.25795	1.9249	1.24485	1.29047	1.03812	3.40589
FGSG_01743	probable acetyl-CoA synthetase	1991	2589.34	2278.34	2199.57	2549.97	2265.32	1909.63	1.30052	1.14432	1.10476	1.28075	1.13778	0.959131
FGSG_01744	conserved hypothetical protein	195	359.52	166.92	229.61	368.21	215.62	157.02	1.84369	0.856	1.17749	1.88826	1.10574	0.805231
FGSG_01745	related to pisatin demethylase cytochrome P450	502	152.49	258.68	344.41	165.18	396.19	173.93	0.303765	0.515299	0.686076	0.329044	0.789223	0.346474
FGSG_01746	conserved hypothetical protein	841	621.08	782.66	568.94	540.28	704.8	603.93	0.738502	0.93063	0.676504	0.642426	0.83805	0.718109
FGSG_01747	hypothetical protein	2261	2850.9	2062.77	1479.25	2746.12	1834.09	1529.15	1.2609	0.912326	0.654246	1.21456	0.811185	0.676316
FGSG_01751	conserved hypothetical protein	2963	3405.33	4655.06	3653.41	3407.99	2782.8	8421.21	1.14928	1.57106	1.23301	1.15018	0.939183	2.84212
FGSG_01752	conserved hypothetical protein	6008	4990.84	8649.06	7326.13	5319.04	6018.39	17003.1	0.830699	1.43959	1.2194	0.885326	1.00173	2.83007
FGSG_01757	related to E.coli galactoside O-acetyltransferase	7567	6847.01	5966.13	8407.12	6689.81	7917.16	3580.1	0.904851	0.788441	1.11102	0.884077	1.04627	0.47312
FGSG_01758	related to monoamine oxidase N	480	637.24	421.18	391.15	663.02	433.93	368.4	1.32758	0.877458	0.814896	1.38129	0.904021	0.7675
FGSG_01759	probable aldehyde dehydrogenase	228	255.5	142.6	151.38	247.77	183.27	97.84	1.12061	0.625439	0.663947	1.08671	0.803816	0.429123
FGSG_01760	conserved hypothetical protein	1567	335.28	1054.6	790.42	331.51	1481.01	567.7	0.213963	0.673006	0.504416	0.211557	0.945124	0.362285
FGSG_01762	related to HNM1 - Choline permease	520	322.15	363.69	422.64	316.6	475.7	276.6	0.619519	0.699404	0.812769	0.608846	0.914808	0.531923
FGSG_01764	related to hydrophobin	233	380.73	179.08	388.1	307.42	210.23	224.66	1.63403	0.768584	1.66567	1.3194	0.902275	0.964206
FGSG_01765	related to epoxide hydrolase	203	199.96	116.07	268.21	203.03	157.67	140.11	0.985025	0.571773	1.32123	1.00015	0.7767	0.690197
FGSG_01766	related to D-alanine aminotransferase	14495	8624.4	13533	12768.7	9158.33	13461.2	10689.6	0.594991	0.933629	0.880901	0.631827	0.928678	0.737467
FGSG_01767	related to pisatin demethylase	3486	3577.01	13257.7	6479.83	3352.93	5774.47	24583.6	1.02611	3.80312	1.85882	0.961827	1.65647	7.0521
FGSG_01768	conserved hypothetical protein	659	575.63	645.58	951.96	614.84	699.41	603.93	0.87349	0.979636	1.44455	0.932989	1.06132	0.916434
FGSG_01769	conserved hypothetical protein	179	215.11	274.15	220.46	165.18	187.32	200.51	1.20173	1.53156	1.23162	0.922793	1.04648	1.12017
FGSG_01770	conserved hypothetical protein	52	96.95	47.53	54.86	68.83	59.29	25.37	1.86442	0.914038	1.055	1.32365	1.14019	0.487885
FGSG_01772	conserved hypothetical protein	106	131.28	210.04	181.86	137.65	153.63	289.89	1.23849	1.98151	1.71566	1.29858	1.44934	2.73481
FGSG_01777	conserved hypothetical protein	155	182.79	128.23	169.67	182.39	169.8	100.25	1.17929	0.82729	1.09465	1.17671	1.09548	0.646774
FGSG_01778	conserved hypothetical protein	413	592.8	449.92	428.74	541.42	424.49	442.08	1.43535	1.08939	1.03811	1.31094	1.02782	1.07041
FGSG_01779	hypothetical protein	66	106.04	96.17	56.89	94.06	68.73	90.59	1.60667	1.45712	0.86197	1.42515	1.04136	1.37258
FGSG_01780	hypothetical protein	414	249.44	501.88	397.24	313.15	396.19	936.09	0.602512	1.21227	0.959517	0.756401	0.956981	2.26109
FGSG_01782	probable organic hydroperoxide resistance protein	3855	2191.45	2617.71	2635.41	2449.03	3397.3	1587.13	0.56847	0.679043	0.683634	0.635287	0.881271	0.411707
FGSG_01785	related to C4-dicarboxylate transport protein mae1	84	66.65	56.38	58.93	56.21	53.9	30.2	0.793452	0.67119	0.701548	0.669167	0.641667	0.359524
FGSG_01789	related to ferric reductase Fre2p	71	222.17	174.66	117.85	219.09	98.37	251.24	3.12915	2.46	1.65986	3.08577	1.38549	3.53859
FGSG_01790	polyketide synthase	12539	20689.5	23257.6	15687.5	21192.4	13513.8	40727.9	1.65001	1.85482	1.2511	1.69012	1.07774	3.2481
FGSG_01791	conserved hypothetical protein	87	194.91	217.77	153.41	144.53	101.07	422.75	2.24034	2.5031	1.76333	1.66126	1.16172	4.8592
FGSG_01792	related to DAL5 - allantoate and ureidosuccinate permease	63	55.54	69.64	59.94	56.21	63.34	48.31	0.881587	1.1054	0.951429	0.892222	1.0054	0.766825
FGSG_01795	related to pathway-specific regulatory protein	638	269.64	502.98	434.83	333.8	576.77	364.77	0.422633	0.78837	0.681552	0.523197	0.904028	0.57174
FGSG_01796	conserved hypothetical protein	60	61.6	45.32	61.97	59.65	72.77	37.44	1.02667	0.755333	1.03283	0.994167	1.21283	0.624
FGSG_01798	conserved hypothetical protein	38	40.4	120.49	84.33	40.15	64.68	222.25	1.06316	3.17079	2.21921	1.05658	1.70211	5.84868
FGSG_01799	conserved hypothetical protein	377	229.24	488.61	356.6	230.56	371.94	1701.88	0.608064	1.29605	0.945889	0.611565	0.986578	4.51427
FGSG_01800	conserved hypothetical protein	836	369.62	780.45	678.67	439.33	772.18	942.13	0.442129	0.933553	0.811806	0.525514	0.92366	1.12695
FGSG_01801	related to glutaminase, kidney isoform, mitochondrial precursor	374	438.29	359.27	371.84	456.54	382.72	359.94	1.1719	0.960615	0.994225	1.2207	1.02332	0.962406
FGSG_01802	related to vacuolar Ca2+/H+ antiporter	2421	3049.85	2596.71	2242.24	2962.92	2060.48	3446.03	1.25975	1.07258	0.926163	1.22384	0.851086	1.42339
FGSG_01803	probable alpha-galactosidase C precursor	733	473.64	627.9	549.64	493.25	625.29	503.68	0.646166	0.856617	0.74985	0.67292	0.853056	0.687149
FGSG_01805	related to isoamyl alcohol oxidase	222	370.63	309.53	233.67	328.07	227.74	379.27	1.6695	1.39428	1.05257	1.47779	1.02586	1.70842
FGSG_01806	conserved hypothetical protein	284	579.67	298.47	348.48	583.87	349.03	542.33	2.04109	1.05095	1.22704	2.05588	1.22898	1.90961
FGSG_01807	conserved hypothetical protein	842	907.89	1668.13	908.27	773.14	720.97	712.64	1.07825	1.98115	1.07871	0.918219	0.856259	0.846366
FGSG_01808	conserved hypothetical protein	1374	900.82	1270.16	1158.2	985.35	1211.49	852.75	0.655619	0.924425	0.84294	0.71714	0.881725	0.620633
FGSG_01809	related to aryl-alcohol dehydrogenases	2013	1433.02	3408.11	1382.73	1172.32	1610.38	1486.88	0.711883	1.69305	0.6869	0.582375	0.79999	0.738639
FGSG_01810	conserved hypothetical protein	746	543.32	1136.4	537.45	409.51	687.28	491.6	0.728311	1.52332	0.720442	0.548941	0.921287	0.658981
FGSG_01811	conserved hypothetical protein	561	400.92	1118.72	409.43	287.92	446.06	551.99	0.714652	1.99415	0.729822	0.513226	0.795116	0.983939
FGSG_01812	probable CYB2 - lactate dehydrogenase cytochrome b2	586	636.23	1258	563.86	481.78	563.3	398.59	1.08572	2.14676	0.962218	0.82215	0.961263	0.680188
FGSG_01813	related to dihydrodipicolinate synthetase	1719	1413.84	3052.15	1405.08	1001.41	1435.2	1151.09	0.822478	1.77554	0.817382	0.582554	0.834904	0.669628
FGSG_01814	related to putative tartrate transporter	2530	1920.8	3726.48	2156.9	1300.8	2092.83	1449.43	0.759209	1.47292	0.85253	0.51415	0.827206	0.572897
FGSG_01815	conserved hypothetical protein	1312	2427.76	1275.69	1804.35	2328.58	1497.19	3224.99	1.85043	0.972325	1.37527	1.77483	1.14115	2.45807
FGSG_01816	related to theta class glutathione S-transferase	352	137.34	259.78	292.6	142.24	370.59	167.89	0.39017	0.738011	0.83125	0.404091	1.05281	0.47696
FGSG_01817	conserved hypothetical protein	177	677.63	268.62	246.88	643.52	208.88	622.05	3.82842	1.51763	1.3948	3.63571	1.18011	3.51441
FGSG_01818	related to bacterial leucyl aminopeptidase	3472	8462.82	5764.93	4343.25	7593.71	3770.59	7069.62	2.43745	1.66041	1.25094	2.18713	1.086	2.03618
FGSG_01819	conserved hypothetical protein	65	128.26	79.59	116.84	102.09	76.81	89.38	1.97323	1.22446	1.79754	1.57062	1.18169	1.37508
FGSG_01822	conserved hypothetical protein	31	100.99	35.37	35.56	76.85	51.21	59.19	3.25774	1.14097	1.1471	2.47903	1.65194	1.90935
FGSG_01825	conserved hypothetical protein	590	982.62	602.47	660.38	886.7	583.51	700.56	1.66546	1.02114	1.11929	1.50288	0.989	1.18739
FGSG_01826	probable methylmalonate-semialdehyde dehydrogenase (acylating)	5617	3828.47	4714.75	4369.67	3765.88	5526.51	3427.91	0.681586	0.839372	0.777937	0.670443	0.98389	0.610274
FGSG_01827	conserved hypothetical protein	5528	793.77	5337.12	4028.3	753.64	8452.16	1997.8	0.143591	0.96547	0.728708	0.136331	1.52897	0.361397
FGSG_01828	conserved hypothetical protein	41	74.73	36.48	43.69	57.35	39.08	47.11	1.82268	0.889756	1.06561	1.39878	0.953171	1.14902
FGSG_01829	related to aldose 1-epimerase	286	343.36	237.67	259.07	298.24	202.14	188.43	1.20056	0.831014	0.905839	1.0428	0.706783	0.658846
FGSG_01830	conserved hypothetical protein	701	627.14	738.44	811.76	593.04	703.45	608.76	0.894636	1.05341	1.158	0.845991	1.0035	0.868417
FGSG_01833	related to integral membrane protein	41	92.91	34.27	42.67	84.88	37.73	45.9	2.2661	0.835854	1.04073	2.07024	0.920244	1.11951
FGSG_01834	conserved hypothetical protein	730	914.95	538.36	729.46	953.23	660.32	345.45	1.25336	0.737479	0.99926	1.30579	0.904548	0.473219
FGSG_01836	related to sterol glucosyltransferase	441	316.09	427.81	392.16	258.09	451.45	293.51	0.716757	0.970091	0.889252	0.585238	1.0237	0.665556
FGSG_01837	conserved hypothetical protein	4416	6088.59	6784.16	5199.71	5914.38	5178.83	8012.96	1.37876	1.53627	1.17747	1.33931	1.17274	1.81453
FGSG_01838	conserved hypothetical protein	2268	2095.51	3444.59	2327.58	2193.23	2695.2	3564.4	0.923946	1.51878	1.02627	0.967033	1.18836	1.5716
FGSG_01839	related to DNA primase large chain	2918	2748.9	2503.85	2903.63	2759.89	2947.2	1934.99	0.942049	0.858071	0.995075	0.945816	1.01001	0.663122
FGSG_01842	related to rat SNF1, Celegans unc-51, Dun1p and other protein serine kinases	16104	15320.9	16826.1	16711.6	15141.5	17854.4	19709.9	0.951375	1.04484	1.03773	0.940235	1.10869	1.22391
FGSG_01844	conserved hypothetical protein	2691	2090.46	2097.04	2858.93	2071.64	2440.51	1317.78	0.776834	0.779279	1.0624	0.76984	0.906916	0.489699
FGSG_01845	conserved hypothetical protein	5847	4732.31	5630.07	5284.04	4876.26	6366.07	4649.06	0.809357	0.962899	0.903718	0.833976	1.08878	0.795119
FGSG_01846	conserved hypothetical protein	5385	4866.63	6031.35	5493.33	4989.82	5130.32	6800.26	0.903738	1.12003	1.02012	0.926615	0.952706	1.26282
FGSG_01847	conserved hypothetical protein	9982	7009.6	8004.58	10249.1	6904.31	10028.9	9371.8	0.702224	0.801901	1.02675	0.691676	1.00469	0.93887
FGSG_01848	conserved hypothetical protein	1748	1215.9	1568.64	1855.15	1301.94	1850.26	1926.54	0.695595	0.897391	1.0613	0.744817	1.0585	1.10214
FGSG_01849	conserved hypothetical protein	8992	6120.9	6248.02	8116.55	6166.73	8767.5	6365.43	0.680705	0.694842	0.902641	0.685802	0.975033	0.707899
FGSG_01850	conserved hypothetical protein	7303	8626.42	10040.8	8649.93	9229.45	8554.58	15812.1	1.18122	1.37489	1.18444	1.26379	1.17138	2.16515
FGSG_01851	conserved hypothetical protein	6275	6029	5232.11	6927.87	6211.47	7243.36	4028.22	0.960797	0.833802	1.10404	0.989876	1.15432	0.641947
FGSG_01852	related to SSH4 - suppressor of SHR3	10135	10475.5	10361.4	11455	10546.3	11631.1	15111.6	1.0336	1.02234	1.13024	1.04058	1.14762	1.49103
FGSG_01854	related to importin beta-2 subunit (transportin)	15093	17895.1	18590.4	16804.1	17192.5	16020.3	27302.5	1.18566	1.23172	1.11337	1.13911	1.06144	1.80895
FGSG_01855	conserved hypothetical protein	2108	2127.82	1831.73	2232.08	2184.05	2145.38	1653.56	1.0094	0.868942	1.05886	1.03608	1.01773	0.784421
FGSG_01856	conserved hypothetical protein	3432	3548.73	3114.06	3473.59	3463.05	3223.46	2542.55	1.03401	0.90736	1.01212	1.00905	0.939237	0.740836
FGSG_01857	probable NADPH-dependent beta-ketoacyl reductase (rhlG)	2791	1865.25	3395.95	2616.11	1827.31	2638.6	2104.1	0.668309	1.21675	0.937338	0.654715	0.945396	0.753887
FGSG_01858	conserved hypothetical protein	1121	1020.99	1347.55	1238.46	1050.73	1230.36	1893.93	0.910785	1.2021	1.10478	0.937315	1.09756	1.6895
FGSG_01859	conserved hypothetical protein	33856	26422.6	23698.7	35097.6	26270.6	32506.8	13827.6	0.78044	0.699985	1.03667	0.77595	0.96015	0.408424
FGSG_01860	hypothetical protein	188	225.2	204.51	251.96	189.27	432.58	141.32	1.19787	1.08782	1.34021	1.00676	2.30096	0.751702
FGSG_01861	related to G protein coupled receptor like protein	17574	15434	14481.4	19114.4	15138.1	17466.3	10123.1	0.878232	0.824025	1.08765	0.861391	0.99387	0.576027
FGSG_01862	conserved hypothetical protein	5966	9443.42	7666.31	8022.06	8969.07	7365.99	14525.8	1.58287	1.285	1.34463	1.50336	1.23466	2.43476
FGSG_01863	related to 26S proteasome-associated ubiquitin carboxyl-terminal hydrolase	4032	3953.69	3542.97	4214.23	3793.41	4169.48	2663.34	0.980578	0.878713	1.0452	0.940826	1.0341	0.660551
FGSG_01865	related to phosphatidylserine decarboxylase	4039	3481.07	3626.99	3707.26	3505.49	3842.01	2689.91	0.861864	0.897992	0.917866	0.86791	0.951228	0.665984
FGSG_01866	conserved hypothetical protein	2747	2263.15	1934.54	2817.27	2478.85	2754.5	1496.54	0.823862	0.704237	1.02558	0.902384	1.00273	0.544791
FGSG_01867	related to methionine synthase reductase	6056	4856.53	5227.68	5631.5	4864.79	5619.5	3797.52	0.801937	0.863223	0.929904	0.803301	0.927923	0.627067
FGSG_01868	related to cytochrome P450 monooxygenase (lovA)	223	231.26	185.72	274.31	239.74	226.4	241.57	1.03704	0.832825	1.23009	1.07507	1.01525	1.08327
FGSG_01870	probable fibrillarin (NOP1)	6893	6127.97	6989.77	6407.7	6616.39	6437.49	6126.28	0.889013	1.01404	0.929595	0.959871	0.933917	0.888768
FGSG_01871	probable ribosomal protein L17.e.A (cytosolic)	15972	11987.3	13839.2	11805.5	12351.8	12910	8598.77	0.750521	0.866464	0.739138	0.773342	0.808291	0.538365
FGSG_01872	conserved hypothetical protein	1454	2922.6	2717.2	1506.68	3054.69	1429.81	3675.52	2.01004	1.86878	1.03623	2.10089	0.983363	2.52787
FGSG_01873	conserved hypothetical protein	3916	3698.19	4197.4	4261.98	3862.24	4713.91	5574.28	0.944379	1.07186	1.08835	0.986272	1.20376	1.42346
FGSG_01874	related to TGF beta receptor associated protein 1	4607	3661.84	4842.99	4449.93	3800.3	4583.19	5267.49	0.794843	1.05122	0.965906	0.824897	0.994832	1.14337
FGSG_01875	conserved hypothetical protein	3374	3530.55	3195.86	3631.06	3734.91	3653.35	2807.07	1.0464	0.947202	1.07619	1.10697	1.08279	0.831971
FGSG_01876	related to neutral amino acid permease	5075	3510.35	3185.91	4745.58	4127.22	4722	1706.71	0.691695	0.627766	0.93509	0.813245	0.930443	0.336298
FGSG_01877	conserved hypothetical protein	7242	5332.18	7341.31	7240.79	5629.9	7973.76	6859.45	0.736286	1.01371	0.999833	0.777396	1.10104	0.947176
FGSG_01879	hypothetical protein	389	457.48	456.55	557.77	451.95	424.49	431.21	1.17604	1.17365	1.43386	1.16183	1.09123	1.10851
FGSG_01881	related to HRD1 - involved in degradation of Hmg2p	18389	14950.3	15085	19223.1	14819.2	18565.9	11184.8	0.813003	0.820327	1.04536	0.805873	1.00962	0.608233
FGSG_01884	conserved hypothetical protein	3152	2820.6	3493.23	3919.6	2957.19	3071.18	3979.91	0.89486	1.10826	1.24353	0.938195	0.974359	1.26266
FGSG_01885	probable multidrug resistance protein 2	3708	3913.3	3911.09	4362.56	4254.54	3488.94	4280.66	1.05537	1.05477	1.17653	1.14739	0.940922	1.15444
FGSG_01886	conserved hypothetical protein	3927	3044.8	3076.47	3890.13	2931.95	3684.34	2344.46	0.77535	0.783415	0.990611	0.746613	0.938207	0.59701
FGSG_01887	conserved hypothetical protein	8938	10884.5	9708.08	9475.91	10752.8	9619.18	8271.44	1.21778	1.08616	1.06018	1.20304	1.07621	0.925424
FGSG_01888	conserved hypothetical protein	1939	2102.58	1937.86	1709.87	2235.67	1883.95	1675.3	1.08436	0.999412	0.881831	1.153	0.971609	0.864002
FGSG_01889	conserved hypothetical protein	2700	2027.85	2555.81	2494.2	2111.79	2429.73	2538.93	0.751056	0.946596	0.923778	0.782144	0.8999	0.940344
FGSG_01890	related to the member of the syntaxin family of t-SNAREs TLG2	8027	7385.28	6937.82	8714.95	7171.58	8305.27	5530.8	0.920055	0.86431	1.0857	0.893432	1.03467	0.689025
FGSG_01891	probable calmodulin	15127	17328.6	17119	13945.1	17010.1	14617.4	15854.4	1.14554	1.13169	0.921871	1.12449	0.966315	1.04809
FGSG_01892	probable class I alpha mannosidase	5403	4985.79	5383.55	5886.5	4962.29	5176.14	5030.74	0.922782	0.9964	1.08949	0.918432	0.958012	0.931101
FGSG_01893	probable gamma-adaptin precursor	5494	5155.45	5888.74	5226.13	5419.98	5486.09	6238.61	0.938378	1.07185	0.951243	0.986527	0.99856	1.13553
FGSG_01894	conserved hypothetical protein	275	328.21	270.84	268.21	341.83	260.09	268.15	1.19349	0.984873	0.975309	1.24302	0.945782	0.975091
FGSG_01895	conserved hypothetical protein	6465	6149.18	5815.78	6965.46	6237.85	6504.87	4824.2	0.951149	0.899579	1.07741	0.964865	1.00617	0.746203
FGSG_01896	related to DNA polymerase Tdt-N	2431	2331.82	2289.39	2577.5	2283.85	2476.89	1774.35	0.959202	0.941748	1.06026	0.939469	1.01888	0.729885
FGSG_01897	related to microsomal glutathione S-transferase 3	1291	809.93	1035.81	1298.4	820.17	1137.38	548.37	0.627366	0.802332	1.00573	0.635298	0.881007	0.424764
FGSG_01898	related to carboxypeptidase	6099	5525.07	5612.38	6296.95	5718.22	5862.07	5028.33	0.905898	0.920213	1.03246	0.937567	0.961153	0.824452
FGSG_01899	conserved hypothetical protein	5349	4629.31	4990.01	5382.59	4467.9	5252.95	4887.01	0.865453	0.932887	1.00628	0.835278	0.982043	0.913631
FGSG_01900	related to signal recognition particle 72 kDa protein	5547	4905	5666.55	5094.05	4884.29	5486.09	4601.95	0.884262	1.02155	0.918343	0.880528	0.989019	0.829629
FGSG_01901	conserved hypothetical protein	1127	1406.77	1726.72	1369.52	1429.27	1604.99	2218.84	1.24824	1.53214	1.21519	1.26821	1.42413	1.9688
FGSG_01902	conserved hypothetical protein	2676	3601.24	4210.67	2815.24	3714.26	4166.78	5239.7	1.34575	1.57349	1.05203	1.38799	1.55709	1.95803
FGSG_01903	related to transcription initiation factor IIE chain TFA1	2753	3191.23	2622.13	2984.91	3221.02	2801.66	2639.18	1.15918	0.952463	1.08424	1.17	1.01768	0.958656
FGSG_01904	related to TATA-binding protein associated factor 2N	9027	7769.03	8947.53	8558.49	7916.04	9305.19	8961.13	0.860644	0.991196	0.948099	0.876929	1.03082	0.992703
FGSG_01905	related to D-arabinitol 2-dehydrogenase	661	494.84	609.1	675.62	536.84	716.92	566.49	0.748623	0.921483	1.02212	0.812163	1.0846	0.85702
FGSG_01906	related to N-acetyltransferase	1225	1231.05	1287.85	1192.74	1202.15	1136.03	1123.31	1.00494	1.05131	0.973665	0.981347	0.927371	0.916988
FGSG_01907	conserved hypothetical protein	2854	3171.03	3148.33	2826.42	3239.37	3200.55	3057.1	1.11108	1.10313	0.990336	1.13503	1.12143	1.07116
FGSG_01909	conserved hypothetical protein	5525	4969.64	5032.02	5159.07	4894.62	5265.08	5522.34	0.899482	0.910773	0.933768	0.885904	0.952956	0.999519
FGSG_01910	related to SMC1 protein	11394	9136.41	10170.2	11394	9213.39	11853.5	8186.89	0.801862	0.892589	1	0.808618	1.04033	0.718526
FGSG_01911	conserved hypothetical protein	4012	2830.7	3356.15	4061.83	2839.04	3728.81	2561.88	0.705558	0.836528	1.01242	0.707637	0.929414	0.638554
FGSG_01912	conserved hypothetical protein	3099	3412.4	3202.49	2801.02	3285.25	3148	2959.26	1.10113	1.03339	0.903846	1.0601	1.01581	0.954908
FGSG_01913	conserved hypothetical protein	694	1363.34	694.22	858.49	1231.97	719.62	870.87	1.96447	1.00032	1.23702	1.77517	1.03692	1.25486
FGSG_01915	probable regulator of conidiation rca-1	31243	19537.2	20841.1	28162.6	20139.4	28210.7	12341.9	0.62533	0.667064	0.901404	0.644605	0.902944	0.39503
FGSG_01917	probable SEC23	10267	9906.96	11952.1	9785.78	10037	10213.5	10997.6	0.964932	1.16413	0.953129	0.977598	0.994786	1.07116
FGSG_01918	related to poly(A) polymerase	880	1011.9	925.26	1108.42	1008.29	838.21	1136.6	1.14989	1.05143	1.25957	1.14578	0.952511	1.29159
FGSG_01919	related to exocyst complex 70 kDa component	15023	10349.3	10857.8	16356	10014.1	14692.9	7336.55	0.688896	0.722742	1.08873	0.666582	0.978027	0.488355
FGSG_01920	probable subunit of pre-replication complex	4952	4812.09	5172.41	4995.5	4845.29	5096.63	4713.08	0.971747	1.04451	1.00878	0.978451	1.02921	0.951753
FGSG_01921	related to carbohydrate kinase MAK32 protein	2441	2041.98	2257.33	2530.77	2163.4	2835.35	1949.49	0.836534	0.924756	1.03678	0.886276	1.16155	0.798644
FGSG_01922	conserved hypothetical protein	929	891.73	952.9	952.98	913.08	929.85	934.89	0.959882	1.02573	1.02581	0.982863	1.00091	1.00634
FGSG_01923	related to adenylate cyclase-associated protein	4396	3618.41	4243.83	4169.52	3691.32	5031.94	3524.54	0.823114	0.965384	0.94848	0.8397	1.14466	0.801761
FGSG_01924	probable carnitine O-acetyltransferase precursor	3424	2527.74	4072.49	3124.09	2559.15	3307.01	2554.63	0.738242	1.1894	0.912409	0.747415	0.965832	0.746095
FGSG_01925	related to nucleosome remodeling complex subunit RSC8	6137	5550.32	6532.12	5694.49	5948.79	6182.8	5955.97	0.904403	1.06438	0.927895	0.969332	1.00746	0.970502
FGSG_01926	probable electron transfer flavoprotein alpha chain precursor	2581	1936.96	2942.71	2454.57	2013.14	2549.66	2130.67	0.750469	1.14014	0.951015	0.779985	0.987857	0.825521
FGSG_01927	related to NADPH:adrenodoxin oxidoreductase precursor, mitochondrial	901	769.53	861.15	869.67	829.34	901.55	747.67	0.854084	0.955771	0.965228	0.920466	1.00061	0.829822
FGSG_01928	conserved hypothetical protein	2275	2987.23	2370.09	2381.42	2753.01	2241.06	2567.91	1.31307	1.0418	1.04678	1.21011	0.985081	1.12875
FGSG_01929	related to DNA mismatch repair protein PMS1	5322	4958.53	4887.2	5613.21	4895.76	5442.96	5649.17	0.931704	0.918301	1.05472	0.91991	1.02273	1.06148
FGSG_01930	conserved hypothetical protein	3076	2529.76	3077.58	3276.49	2731.21	2912.17	3409.79	0.822419	1.00051	1.06518	0.88791	0.946739	1.10851
FGSG_01931	related to TMS1 protein	4649	4935.3	4673.85	4411.32	4785.64	4352.75	4213.02	1.06158	1.00535	0.948875	1.02939	0.936277	0.906221
FGSG_01932	probable cystathionine beta-lyase	9370	7563.02	7666.31	8839.92	7552.41	8884.74	5936.64	0.807153	0.818176	0.943428	0.80602	0.948211	0.63358
FGSG_01933	probable MSP1 AAA ATPase protein	3468	4210.2	4160.92	3838.32	4441.52	3540.15	4170.75	1.21401	1.1998	1.10678	1.28072	1.0208	1.20264
FGSG_01934	conserved hypothetical protein	978	1142.18	963.95	1083.02	1162	1094.25	969.91	1.16787	0.985634	1.10738	1.18814	1.11887	0.991728
FGSG_01935	probable protein MCD4, required for GPI anchor synthesis	4086	3682.03	4097.91	4070.97	3772.77	3808.32	4746.9	0.901133	1.00291	0.996322	0.923341	0.932041	1.16175
FGSG_01936	related to cutinase transcription factor 1 beta	6320	4709.09	6466.9	6358.93	5163.03	6258.26	6521.25	0.745109	1.02324	1.00616	0.816935	0.990231	1.03184
FGSG_01939	probable amino-acid N-acetyltransferase	1725	1944.03	1718.98	1894.78	1901.87	1700.67	1735.7	1.12697	0.99651	1.09842	1.10253	0.985896	1.0062
FGSG_01940	conserved hypothetical protein	5793	6517.79	6779.74	5806.24	6797.63	5833.77	7151.75	1.12511	1.17033	1.00229	1.17342	1.00704	1.23455
FGSG_01941	probable NADH-ubiquinone oxidoreductase	6116	4829.26	5894.27	5206.82	5047.18	5765.04	4727.57	0.789611	0.963746	0.851344	0.825242	0.942616	0.772984
FGSG_01942	conserved hypothetical protein	459	388.81	392.44	514.08	442.78	429.88	340.62	0.847081	0.854989	1.12	0.964662	0.936558	0.742092
FGSG_01943	conserved hypothetical protein	25238	33843.2	40643.1	31029.6	34990.7	23782.5	67117.3	1.34096	1.61039	1.22948	1.38643	0.942328	2.65937
FGSG_01944	conserved hypothetical protein	3582	3994.09	3552.92	3619.89	3994.15	3992.94	3198.42	1.11504	0.991882	1.01058	1.11506	1.11472	0.892915
FGSG_01946	related to vacuolar Ca2+/H+ antiporter	6783	10514.9	7980.26	7939.77	10166.6	7359.25	8346.33	1.55019	1.17651	1.17054	1.49884	1.08496	1.23048
FGSG_01948	related to regulator of nonsense transcripts	7982	6959.11	8017.84	7697.97	7320.7	8434.64	8325.79	0.87185	1.00449	0.964416	0.917151	1.05671	1.04307
FGSG_01949	probable chitin synthase D	2684	2473.2	2202.06	2742.09	2325.14	2544.27	1636.65	0.921461	0.82044	1.02164	0.866297	0.94794	0.60978
FGSG_01950	probable heat shock protein Hsp88	18921	20703.6	20031.9	18621.6	20859.8	18834.1	20883.9	1.09421	1.05871	0.984178	1.10247	0.995406	1.10374
FGSG_01953	conserved hypothetical protein	897	921.01	942.95	937.74	880.96	878.64	909.52	1.02677	1.05123	1.04542	0.982118	0.979532	1.01396
FGSG_01954	related to SAC2 protein	4284	3837.56	3938.73	4448.91	3720	4223.38	3694.85	0.895789	0.919405	1.03849	0.868347	0.98585	0.862477
FGSG_01955	probable HYP2 - translation initiation factor eIF5A.1	38405	34991.4	38429.9	32437.8	35820.1	39226	36938.8	0.911117	1.00065	0.844623	0.932693	1.02138	0.961823
FGSG_01956	probable ubiquitin fusion protein (ubiquitin / ribosomal protein)	17810	16238.9	16999.6	15001.8	16531.8	15660.5	10986.7	0.911787	0.9545	0.842322	0.928231	0.879308	0.616884
FGSG_01957	conserved hypothetical protein	2468	2627.72	2818.9	2512.48	2739.24	2449.94	2845.72	1.06472	1.14218	1.01802	1.1099	0.992682	1.15305
FGSG_01958	related to D.melanogaster heat shock protein 67B2	963	1106.83	940.74	934.69	1176.91	909.63	926.43	1.14936	0.976885	0.970602	1.22213	0.944579	0.962025
FGSG_01959	probable cytochrome P450 (involved in C-22 denaturation of the ergosterol side-chain)	10202	10740.1	10245.3	9839.63	10664.5	10709.4	9719.66	1.05275	1.00425	0.96448	1.04533	1.04973	0.952721
FGSG_01960	related to proteinase inhibitor PBI2	11293	18494	13794.9	12123.5	16210.6	12694.4	15738.4	1.63765	1.22155	1.07354	1.43546	1.1241	1.39365
FGSG_01962	probable arginosuccinate synthetase	7155	4944.39	4927	6093.76	5104.53	6169.32	2895.25	0.69104	0.688609	0.851679	0.713421	0.862239	0.404647
FGSG_01963	related to branched-chain alpha-ketoacid dehydrogenase kinase, mitochondrial precursor	2602	1994.52	2207.59	2436.29	1990.19	2452.64	1867.35	0.766533	0.84842	0.936314	0.764869	0.942598	0.717659
FGSG_01964	probable chitin synthase	16513	17598.2	26384.9	19823.5	17713.3	15912.5	45576.2	1.06572	1.59783	1.20048	1.07269	0.963634	2.76002
FGSG_01965	conserved hypothetical protein	3838	6198.66	6785.27	4967.06	6289.47	3804.28	8476.77	1.61508	1.76792	1.29418	1.63874	0.991214	2.20864
FGSG_01967	related to quinic acid utilisation protein QUTG (inositol-1(or 4)-monophosphatase)	3628	3758.79	3346.2	3236.87	3783.09	3356.88	2863.84	1.03605	0.922326	0.892191	1.04275	0.92527	0.789372
FGSG_01968	related to RNA-binding protein La1	16759	15891.5	14307.9	17270.4	17135.2	16815.4	11692.1	0.948238	0.853742	1.03051	1.02245	1.00336	0.697661
FGSG_01969	related to phospholipase A2, cytosolic	4100	3802.21	3539.66	3713.35	3835.86	3924.22	2635.55	0.927368	0.863332	0.905695	0.935576	0.957127	0.642817
FGSG_01970	related to ribosomal protein YmL3	2198	1968.26	2067.2	2125.4	2014.28	2084.74	1874.6	0.895478	0.940491	0.96697	0.916415	0.948471	0.852866
FGSG_01972	probable bifunctional P-450:NADPH-P450 reductase	3653	3001.37	4565.52	2949.35	3020.28	3362.27	2970.13	0.821618	1.2498	0.807377	0.826794	0.920413	0.813066
FGSG_01973	related to phospholipase D	5143	3268.99	4284.73	3961.25	3508.94	4748.95	3320.41	0.635619	0.833119	0.770222	0.682275	0.923381	0.645617
FGSG_01974	probable het-c2 protein	25840	22323.5	19829.6	26115.4	21579	23798.7	14664.6	0.863911	0.767399	1.01066	0.8351	0.921	0.567517
FGSG_01975	related to triacylglycerol lipase	2887	3043.79	2974.77	3106.82	3148.75	2742.37	3173.05	1.05431	1.0304	1.07614	1.09067	0.949903	1.09908
FGSG_01977	conserved hypothetical protein	296	462.53	311.74	419.59	395.74	334.21	738	1.5626	1.05318	1.41753	1.33696	1.12909	2.49324
FGSG_01978	conserved hypothetical protein	100	51.5	66.33	87.37	43.59	87.59	70.06	0.515	0.6633	0.8737	0.4359	0.8759	0.7006
FGSG_01979	conserved hypothetical protein	94	43.42	56.38	124.96	48.18	146.89	41.07	0.461915	0.599787	1.32936	0.512553	1.56266	0.436915
FGSG_01980	conserved hypothetical protein	735	930.1	676.54	832.08	938.32	859.77	730.76	1.26544	0.920463	1.13208	1.27663	1.16976	0.994231
FGSG_01981	related to cytochrome b-large subunit	59	84.83	45.32	67.05	67.68	74.12	74.89	1.4378	0.768136	1.13644	1.14712	1.25627	1.26932
FGSG_01982	conserved hypothetical protein	636	536.25	442.18	888.97	555.19	622.59	365.98	0.84316	0.695252	1.39775	0.87294	0.978915	0.57544
FGSG_01983	conserved hypothetical protein	614	553.42	745.07	1020.03	682.52	525.56	864.83	0.901336	1.21347	1.66129	1.1116	0.855961	1.40852
FGSG_01984	hypothetical protein	255	338.31	193.45	232.66	313.15	276.26	202.92	1.32671	0.758627	0.912392	1.22804	1.08337	0.795765
FGSG_01985	related to acetyltransferase	712	658.44	505.19	682.73	605.66	715.58	423.96	0.924775	0.709537	0.95889	0.850646	1.00503	0.595449
FGSG_01986	related to putative tartrate transporter	587	1916.76	683.17	730.48	1831.9	583.51	1636.65	3.26535	1.16383	1.24443	3.12078	0.994055	2.78816
FGSG_01991	conserved hypothetical protein	356	234.29	248.73	389.11	240.89	359.81	205.34	0.658118	0.69868	1.09301	0.676657	1.0107	0.576798
FGSG_01992	conserved hypothetical protein	3929	2629.74	3416.95	3523.37	2789.71	3743.64	3320.41	0.669315	0.869674	0.89676	0.710031	0.952823	0.845103
FGSG_01993	conserved hypothetical protein	686	785.69	748.39	649.2	763.96	640.11	676.4	1.14532	1.09095	0.946356	1.11364	0.933105	0.986006
FGSG_01994	conserved hypothetical protein	326	248.43	393.54	253.99	306.27	303.21	177.56	0.762055	1.20718	0.77911	0.939479	0.930092	0.544663
FGSG_01995	related to Na+/H+ antiporter	1124	947.27	794.82	1246.59	923.4	1114.47	742.84	0.842767	0.707135	1.10907	0.82153	0.991521	0.66089
FGSG_01997	related to tetracycline efflux protein (otrb)	246	290.85	198.98	285.49	290.21	411.02	414.3	1.18232	0.808862	1.16053	1.17972	1.67081	1.68415
FGSG_02000	related to URE2 - nitrogen catabolite repression regulator	2975	3671.94	3017.88	2897.53	3590.38	3138.56	3757.66	1.23427	1.01441	0.97396	1.20685	1.05498	1.26308
FGSG_02001	related to phosphatidylserine decarboxylase 2	2323	1585.52	1744.4	1405.08	1640.33	1790.96	1370.92	0.682531	0.750926	0.604856	0.706126	0.770969	0.590151
FGSG_02002	conserved hypothetical protein	7282	5760.37	6762.05	6934.98	6111.67	7143.64	6744.7	0.791042	0.928598	0.952346	0.839285	0.981	0.926215
FGSG_02003	conserved hypothetical protein	2177	1651.16	1772.04	2299.13	1633.45	2216.8	1451.85	0.758457	0.813983	1.0561	0.750322	1.01828	0.666904
FGSG_02004	conserved hypothetical protein	8363	7134.83	8874.57	8502.62	7558.15	11311.8	8282.31	0.853142	1.06117	1.01669	0.903761	1.3526	0.990352
FGSG_02007	conserved hypothetical protein	1195	1641.06	1475.78	1247.61	1729.81	1486.4	1431.32	1.37327	1.23496	1.04403	1.44754	1.24385	1.19776
FGSG_02008	related to type-III integral membrane protein, involved in copper and iron homeostasis	5828	4627.29	4963.48	5693.47	4836.11	5572.33	4463.05	0.793976	0.851661	0.976917	0.829806	0.956131	0.765794
FGSG_02009	conserved hypothetical protein	2639	2909.47	2351.3	2826.42	3070.75	2797.62	1941.03	1.10249	0.890981	1.07102	1.1636	1.06011	0.735517
FGSG_02010	related to transcription initiation factor tfiid 100 kDa subunit	9811	8790.02	8404.75	10043.8	8769.47	11187.8	7869.22	0.895935	0.856666	1.02373	0.893841	1.14033	0.802081
FGSG_02011	related to vacuolar protein sorting-associated protein VPS5	8618	8069.98	8309.68	8924.24	8316.37	8739.2	7527.4	0.93641	0.964224	1.03553	0.965	1.01406	0.873451
FGSG_02012	related to ribosomal protein YmL36 precursor, mitochondrial	1400	1191.66	1334.28	1313.64	1289.32	1264.05	985.62	0.851186	0.953057	0.938314	0.920943	0.902893	0.704014
FGSG_02013	conserved hypothetical protein	561	793.77	734.02	696.95	799.52	665.72	752.5	1.41492	1.30841	1.24234	1.42517	1.18667	1.34135
FGSG_02014	probable heat shock protein 80	64548	72282.4	60343.3	60327	70595.1	61531.5	66744	1.11982	0.93486	0.934607	1.09368	0.953267	1.03402
FGSG_02015	related to esterase	552	554.43	523.98	583.16	504.72	478.4	572.53	1.0044	0.949239	1.05645	0.914348	0.866667	1.03719
FGSG_02016	related to acyl-CoA sterol acyltransferase	5025	4998.92	4262.62	5705.66	4982.94	5110.11	3902.6	0.99481	0.848283	1.13545	0.99163	1.01694	0.776637
FGSG_02017	conserved hypothetical protein	1543	2588.33	1384.03	1653.99	2549.97	2090.13	1924.12	1.67747	0.896973	1.07193	1.65261	1.35459	1.247
FGSG_02018	conserved hypothetical protein	1139	1911.71	3054.36	1869.38	1930.55	1552.44	3576.48	1.67841	2.68162	1.64125	1.69495	1.36299	3.14002
FGSG_02019	related to diacylglycerol pyrophosphate phosphatase DPP1	10751	11150.1	8216.83	11851.2	11270.1	10615.1	6701.22	1.03712	0.764285	1.10234	1.04829	0.987356	0.623311
FGSG_02020	conserved hypothetical protein	1004	808.92	862.25	1141.95	875.23	1084.82	1165.59	0.805697	0.858815	1.1374	0.871743	1.0805	1.16095
FGSG_02021	hypothetical protein	2404	6224.92	3432.43	2970.68	5854.73	4505.03	4089.82	2.5894	1.4278	1.23572	2.43541	1.87397	1.70126
FGSG_02022	probable beta (1-3) glucanosyltransferase gel3p	41578	41893	55654	40956.6	43356.4	40317.6	91180.3	1.00758	1.33854	0.985055	1.04277	0.969685	2.19299
FGSG_02023	hypothetical protein	164	264.59	142.6	243.83	291.36	133.41	260.9	1.61335	0.869512	1.48677	1.77659	0.813476	1.59085
FGSG_02024	conserved hypothetical protein	4678	2810.51	3335.15	3224.67	2821.83	4310.98	1745.36	0.600793	0.712944	0.689327	0.603213	0.921543	0.3731
FGSG_02025	probable iron inhibited ABC transporter 2	11650	12572	13279.8	12598	12809.5	12145.9	13511.1	1.07915	1.1399	1.08137	1.09953	1.04257	1.15975
FGSG_02026	related to DNA-dependent ATPase DOMINO B	32893	31166	31858	35577.1	30680	35815.2	47001.5	0.947497	0.968535	1.0816	0.93272	1.08884	1.42892
FGSG_02027	conserved hypothetical protein	8457	11169.3	7402.11	9462.7	10918	8499.32	7852.31	1.32072	0.875264	1.11892	1.291	1.005	0.928498
FGSG_02028	probable RPT2 - 26S proteasome regulatory subunit	13483	12898.2	12340.2	13436.1	13041.2	13205.1	9896.01	0.956629	0.915238	0.996525	0.967234	0.979393	0.733962
FGSG_02029	probable ubiquitin--protein ligase	7489	8103.3	6591.81	7766.04	8176.43	7843.04	5383.44	1.08203	0.880199	1.03699	1.09179	1.04727	0.718846
FGSG_02030	probable atp-specific succinyl-coa synthetase alpha subunit	6727	7112.61	7310.36	6703.34	7293.17	7108.6	7239.92	1.05732	1.08672	0.996483	1.08416	1.05673	1.07625
FGSG_02031	related to monocarboxylate transporter 2	1059	795.79	1347.55	1417.27	824.75	1327.39	856.37	0.751454	1.27247	1.33831	0.778801	1.25344	0.808659
FGSG_02032	related to neutral amino acid permease	23758	15871.3	16252.4	23282.9	15718.5	22386.4	8834.3	0.668042	0.684079	0.980002	0.66161	0.942266	0.371845
FGSG_02033	related to 6-HYDROXY-D-NICOTINE OXIDASE	90	65.64	81.8	77.21	66.53	71.42	48.31	0.729333	0.908889	0.857889	0.739222	0.793556	0.536778
FGSG_02034	probable alcohol dehydrogenase I - ADH1	37	41.41	23.21	55.88	49.32	44.47	36.24	1.11919	0.627297	1.51027	1.33297	1.20189	0.979459
FGSG_02035	related to vegetatible incompatibility protein HET-E-1	275	157.54	302.89	231.64	170.92	219.66	196.88	0.572873	1.10142	0.842327	0.621527	0.798764	0.715927
FGSG_02036	conserved hypothetical protein	52	31.31	171.35	57.91	33.27	59.29	157.02	0.602115	3.29519	1.11365	0.639808	1.14019	3.01962
FGSG_02037	conserved hypothetical protein	485	447.38	520.67	601.45	430.16	510.74	753.71	0.922433	1.07355	1.2401	0.886928	1.05307	1.55404
FGSG_02038	conserved hypothetical protein	31	39.39	40.9	41.65	32.12	35.04	49.52	1.27065	1.31935	1.34355	1.03613	1.13032	1.59742
FGSG_02039	related to protein TOL	496	578.66	646.69	627.87	581.57	468.97	884.15	1.16665	1.30381	1.26587	1.17252	0.945504	1.78256
FGSG_02040	probable histone acetyltransferase	2693	2471.18	2601.13	2412.92	2492.62	2428.38	2509.94	0.917631	0.965886	0.895997	0.925592	0.901738	0.932024
FGSG_02041	conserved hypothetical protein	3428	3651.74	2758.1	4489.55	4075.6	3441.77	2598.11	1.06527	0.80458	1.30967	1.18891	1.00402	0.757908
FGSG_02042	conserved hypothetical protein	1602	2276.28	1089.98	1926.27	2632.56	1245.18	1286.37	1.4209	0.680387	1.20242	1.6433	0.777266	0.802978
FGSG_02043	related to CCR4 protein	15671	11675.3	13696.5	15421.3	11781.7	15780.4	13962.9	0.745023	0.874006	0.984069	0.751817	1.00698	0.891001
FGSG_02044	conserved hypothetical protein	4536	2495.42	4301.31	3771.26	2634.86	5232.74	3211.7	0.550137	0.948261	0.831407	0.580877	1.1536	0.708047
FGSG_02045	conserved hypothetical protein	340	247.42	344.9	331.2	234.01	375.98	281.43	0.727706	1.01441	0.974118	0.688265	1.10582	0.827735
FGSG_02047	conserved hypothetical protein	13058	9559.56	12387.7	11780.1	9594.23	11853.5	11276.6	0.732085	0.948667	0.902138	0.73474	0.907758	0.863578
FGSG_02048	conserved hypothetical protein	6378	6722.79	6378.46	6384.33	6749.45	6256.91	5488.52	1.05406	1.00007	1.00099	1.05824	0.981014	0.860539
FGSG_02049	conserved hypothetical protein	5698	5902.77	5888.74	7033.53	5990.08	7537.14	7656.64	1.03594	1.03347	1.23439	1.05126	1.32277	1.34374
FGSG_02050	conserved hypothetical protein	183	375.68	240.99	214.37	372.8	219.66	198.09	2.0529	1.31689	1.17142	2.03716	1.20033	1.08246
FGSG_02051	probable manganese superoxide dismutase precursor (sod-2)	2188	4313.21	2904.02	2138.61	4301.57	2700.59	3124.74	1.9713	1.32725	0.977427	1.96598	1.23427	1.42813
FGSG_02052	conserved hypothetical protein	9187	17212.5	15444.3	11128.9	15521.2	9130	13193.5	1.87357	1.6811	1.21137	1.68948	0.993796	1.4361
FGSG_02053	conserved hypothetical protein	4365	3212.44	3185.91	4724.24	3461.91	4267.85	2222.47	0.735954	0.729876	1.0823	0.793107	0.977743	0.509157
FGSG_02054	probable kinesin-related protein KLPA	4501	4711.11	4155.39	4867.49	4675.52	4771.86	2796.2	1.04668	0.923215	1.08142	1.03877	1.06018	0.62124
FGSG_02058	related to endopeptidase Clp	1022	1025.03	1076.71	967.2	1038.11	968.93	968.71	1.00296	1.05353	0.94638	1.01576	0.948072	0.947857
FGSG_02059	related to alpha-galactosidase precursor	210	285.8	180.19	236.72	309.71	172.49	212.58	1.36095	0.858048	1.12724	1.47481	0.821381	1.01229
FGSG_02060	related to HRT2 - high level expression reduced Ty3 transposition	1479	1447.16	1260.22	1465.02	1390.27	1590.17	963.87	0.978472	0.852076	0.990548	0.940007	1.07517	0.651704
FGSG_02061	conserved hypothetical protein	7984	7451.93	7570.14	8960.82	7352.82	8702.81	8521.47	0.933358	0.948164	1.12235	0.920944	1.09003	1.06732
FGSG_02063	related to dihydrodipicolinate synthase	1244	1264.37	1040.23	1300.44	1228.53	1498.53	1078.62	1.01637	0.836198	1.04537	0.987564	1.20461	0.867058
FGSG_02064	related to quinate transport protein	276	359.52	257.57	281.42	349.86	296.47	277.81	1.30261	0.933225	1.01964	1.26761	1.07417	1.00656
FGSG_02066	related to HXT2 - Hexose facilitator of moderately low affinity for glucose	1146	728.13	1061.23	1219.16	749.05	925.8	722.3	0.635366	0.92603	1.06384	0.653621	0.807853	0.630279
FGSG_02067	related to raffinose invertase	1522	1384.55	1343.12	1559.51	1344.38	1388.03	1126.94	0.909691	0.88247	1.02465	0.883298	0.911978	0.740434
FGSG_02069	related to 5`-nucleotidase precursor	1871	2704.47	3189.23	2244.27	2541.94	2088.78	3179.09	1.44547	1.70456	1.1995	1.3586	1.1164	1.69914
FGSG_02070	related to putative tartrate transporter	10806	15107.9	16872.5	11972.1	14363.8	12443.8	22518.2	1.3981	1.5614	1.10792	1.32924	1.15156	2.08386
FGSG_02071	related to acetyltransferase	8076	7580.18	7504.91	8383.75	7491.62	8152.99	7044.25	0.938606	0.929286	1.03811	0.92764	1.00953	0.872245
FGSG_02072	related to NAD kinase	2259	2135.9	1980.97	2355.01	2167.99	2288.23	1942.24	0.945507	0.876923	1.0425	0.959712	1.01294	0.859779
FGSG_02073	probable lysophospholipase	2212	2267.19	2976.98	2372.28	2369.88	2346.17	3953.33	1.02495	1.34583	1.07246	1.07137	1.06066	1.78722
FGSG_02074	conserved hypothetical protein	7761	5909.84	5417.82	8529.03	5756.08	7698.85	3081.26	0.761479	0.698083	1.09896	0.741667	0.991992	0.397018
FGSG_02075	conserved hypothetical protein	2644	1309.82	2028.5	1413.21	1407.47	2135.95	1253.76	0.495393	0.767209	0.534497	0.532326	0.807848	0.474191
FGSG_02076	hypothetical protein	56	65.64	117.18	64.01	67.68	57.95	176.35	1.17214	2.0925	1.14304	1.20857	1.03482	3.14911
FGSG_02077	conserved hypothetical protein	8340	4663.64	12402.1	7889.99	4722.55	7460.32	15978.8	0.559189	1.48706	0.946042	0.566253	0.894523	1.91592
FGSG_02078	conserved hypothetical protein	849	1036.14	903.15	917.42	917.67	893.46	748.87	1.22042	1.06378	1.08059	1.08088	1.05237	0.882061
FGSG_02079	related to aminopeptidase Y	38712	34924.8	29325.4	42120.9	35392.2	36409.5	23165.6	0.90217	0.757528	1.08806	0.914243	0.940522	0.598408
FGSG_02082	conserved hypothetical protein	8762	5392.78	6686.88	7764.01	5409.66	8620.61	4407.49	0.615474	0.763168	0.8861	0.6174	0.983863	0.503023
FGSG_02083	related to transcription activator amyR	22942	17144.8	20907.4	19077.8	16949.3	21081.9	18778.6	0.74731	0.911316	0.831567	0.738791	0.918921	0.818526
FGSG_02084	related to RTM1 protein	531	1914.74	982.75	722.35	1767.66	641.46	1312.95	3.60591	1.85075	1.36036	3.32893	1.20802	2.4726
FGSG_02085	conserved hypothetical protein	62348	371658	138121	68614.2	333972	59527.6	222261	5.96103	2.21532	1.1005	5.35658	0.954764	3.56485
FGSG_02087	conserved hypothetical protein	616	1088.65	1961.07	1203.92	1300.8	886.72	2212.8	1.76729	3.18356	1.95442	2.11169	1.43948	3.59221
FGSG_02089	conserved hypothetical protein	9281	9331.32	6859.33	10406.5	9443.96	9406.26	5147.91	1.00542	0.739072	1.12127	1.01756	1.0135	0.554672
FGSG_02090	related to inositol polyphosphate 5-phosphatase ocrl-1	4693	4227.37	4196.3	4574.89	4458.72	4614.19	3293.84	0.900782	0.894162	0.974833	0.950079	0.983207	0.701862
FGSG_02091	conserved hypothetical protein	3699	4243.53	3667.89	3796.66	4296.98	3844.71	3261.23	1.14721	0.99159	1.0264	1.16166	1.03939	0.881652
FGSG_02092	probable cytosceletal binding protein	4027	3628.51	3762.96	3798.7	3633.97	4261.12	2906.12	0.901045	0.934433	0.943308	0.902401	1.05814	0.721659
FGSG_02093	related to aminoacyl-tRNA hydrolase	269	229.24	373.64	243.83	260.39	316.69	283.85	0.852193	1.389	0.906431	0.967993	1.17729	1.0552
FGSG_02095	related to protein GRR1	17091	17347.8	15819	17656.5	17230.4	16920.5	14266.1	1.01502	0.925576	1.03309	1.00816	0.990023	0.834712
FGSG_02096	conserved hypothetical protein	3429	3457.84	3106.32	3367.93	3536.47	3138.56	3111.45	1.00841	0.905897	0.98219	1.03134	0.915299	0.907393
FGSG_02097	probable glutaredoxin	7887	9486.84	8546.25	7553.7	9496.73	7080.3	7654.22	1.20285	1.08359	0.957741	1.2041	0.897718	0.970486
FGSG_02098	conserved hypothetical protein	12607	17652.8	15285.1	13255.3	17300.3	12314.4	18581.8	1.40023	1.21243	1.05142	1.37228	0.976789	1.47392
FGSG_02099	probable ribosomal protein l13a	17654	13219.4	15922.9	13560.1	13804	16196.8	10253.5	0.748803	0.901945	0.768103	0.781921	0.917459	0.580805
FGSG_02100	related to translocation protein	10553	10748.2	11766.4	11938.6	11119.9	11689.1	10764.5	1.0185	1.11498	1.1313	1.05371	1.10766	1.02004
FGSG_02101	conserved hypothetical protein	4213	5150.4	4761.18	4367.64	5401.63	4475.39	5836.39	1.2225	1.13012	1.03671	1.28213	1.06228	1.38533
FGSG_02102	conserved hypothetical protein	989	1106.83	1386.24	1371.55	1209.03	1024.18	1854.07	1.11914	1.40166	1.3868	1.22248	1.03557	1.87469
FGSG_02103	hypothetical protein	291	246.41	311.74	359.65	242.04	300.52	320.08	0.84677	1.07127	1.23591	0.831753	1.03271	1.09993
FGSG_02104	conserved hypothetical protein	517	603.91	583.68	597.39	604.51	491.87	766.99	1.1681	1.12897	1.15549	1.16926	0.951393	1.48354
FGSG_02105	probable clathrin-associated adaptor complex medium chain	2027	2359.09	2444.15	2129.46	2419.2	2001.19	2823.98	1.16383	1.2058	1.05055	1.19349	0.987267	1.39318
FGSG_02106	conserved hypothetical protein	893	825.07	1002.65	855.44	844.26	898.85	959.04	0.923931	1.12279	0.95794	0.94542	1.00655	1.07395
FGSG_02108	conserved hypothetical protein	280	289.84	264.2	374.89	306.27	354.42	439.66	1.03514	0.943571	1.33889	1.09382	1.26579	1.57021
FGSG_02109	conserved hypothetical protein	2867	3571.96	3128.43	3590.42	3417.17	4461.91	5016.25	1.24589	1.09119	1.25233	1.1919	1.5563	1.74965
FGSG_02111	related to cytochrome P450 7A1	91	103.01	53.06	151.38	128.47	90.29	68.85	1.13198	0.583077	1.66352	1.41176	0.992198	0.756593
FGSG_02112	conserved hypothetical protein	171	173.7	129.34	185.92	176.65	152.28	130.45	1.01579	0.756374	1.08725	1.03304	0.890526	0.762865
FGSG_02114	related to cytochrome P450 7B1	142	180.77	98.39	199.13	192.71	122.63	102.67	1.27303	0.692887	1.40232	1.35711	0.863592	0.723028
FGSG_02115	related to TRI7 - trichothecene biosynthesis gene cluster	273	188.85	194.56	250.94	157.15	234.48	150.98	0.691758	0.712674	0.919194	0.575641	0.858901	0.55304
FGSG_02117	related to cytochrome P450 monooxygenase (lovA)	82	103.01	55.27	107.69	81.44	53.9	60.39	1.25622	0.674024	1.31329	0.993171	0.657317	0.736463
FGSG_02118	related to pisatin demethylase / cytochrome P450 monooxygenase	96	132.29	71.85	96.52	119.3	107.81	95.42	1.37802	0.748437	1.00542	1.24271	1.12302	0.993958
FGSG_02119	related to YER185w, Rta1p	887	1776.38	1117.61	1152.11	1666.72	1224.97	1506.2	2.00268	1.25999	1.29888	1.87905	1.38103	1.69808
FGSG_02120	hypothetical protein	625	397.89	308.42	741.65	337.24	630.68	234.33	0.636624	0.493472	1.18664	0.539584	1.00909	0.374928
FGSG_02121	related to amidohydrolase AmhX	51	64.63	38.69	80.26	64.24	67.38	44.69	1.26725	0.758627	1.57373	1.25961	1.32118	0.876275
FGSG_02123	hypothetical protein	62	135.32	57.48	90.42	133.06	86.25	84.55	2.18258	0.927097	1.45839	2.14613	1.39113	1.36371
FGSG_02125	related to TGF beta induced protein ig-h3 precursor	25280	38298.8	33239.8	21659.4	36463.6	25630	35773.2	1.51498	1.31487	0.856779	1.44239	1.01385	1.41508
FGSG_02126	related to cyclin CCL1	2146	2282.34	2069.41	2063.43	2374.47	2181.77	1945.87	1.06353	0.96431	0.961524	1.10646	1.01667	0.906743
FGSG_02127	conserved hypothetical protein	5804	6129.99	6407.2	5142.82	5947.64	5924.06	5459.54	1.05617	1.10393	0.886082	1.02475	1.02069	0.940651
FGSG_02128	conserved hypothetical protein	1084	950.3	746.18	1149.06	1020.91	1008.01	565.28	0.876661	0.688358	1.06002	0.941799	0.929899	0.521476
FGSG_02130	related to ECM32 - DNA dependent ATPase/DNA helicase B	1692	2320.71	1410.56	2029.9	2458.21	1516.05	2063.03	1.37158	0.833664	1.1997	1.45284	0.896011	1.21928
FGSG_02131	conserved hypothetical protein	497	956.36	379.17	615.68	932.58	460.88	537.5	1.92427	0.762918	1.23879	1.87642	0.927324	1.08149
FGSG_02135	hypothetical protein	348	527.16	466.5	466.33	542.57	481.09	544.75	1.51483	1.34052	1.34003	1.55911	1.38244	1.56537
FGSG_02136	probable high affinity methionine permease	4531	6645.03	11989.7	6606.82	6898.58	7558.7	16233.7	1.46657	2.64616	1.45814	1.52253	1.66822	3.5828
FGSG_02137	probable NADH cytb-reductase	403	317.1	693.12	442.96	355.6	547.13	556.82	0.786849	1.7199	1.09916	0.882382	1.35764	1.38169
FGSG_02138	probable monooxygenase	273	201.98	384.7	263.14	229.42	246.61	107.5	0.739853	1.40916	0.963883	0.840366	0.903333	0.393773
FGSG_02139	related to multidrug resistance-associated protein	559	560.49	420.07	653.27	587.31	630.68	445.7	1.00267	0.751467	1.16864	1.05064	1.12823	0.797317
FGSG_02140	related to tol protein	162	149.46	118.28	166.62	154.86	119.94	164.27	0.922593	0.730123	1.02852	0.955926	0.74037	1.01401
FGSG_02141	conserved hypothetical protein	1034	1065.43	1061.23	1019.01	1028.94	1028.22	1066.54	1.0304	1.02633	0.985503	0.995106	0.99441	1.03147
FGSG_02142	related to cell surface ferroxidase	720	970.5	579.26	786.36	923.4	563.3	646.21	1.34792	0.804528	1.09217	1.2825	0.782361	0.897514
FGSG_02143	related to high-affinity iron permease	425	537.26	330.53	478.52	510.45	334.21	370.81	1.26414	0.777718	1.12593	1.20106	0.786376	0.872494
FGSG_02144	conserved hypothetical protein	1758	2395.44	1962.18	1752.54	2319.41	1917.64	2046.12	1.36259	1.11614	0.996894	1.31935	1.09081	1.16389
FGSG_02145	probable MUP1 - High affinity methionine permease	3592	5424.08	3179.28	4352.4	5172.21	3744.99	3099.37	1.51004	0.8851	1.21169	1.43992	1.04259	0.862854
FGSG_02146	probable succinyl-CoA 3-ketoacid-coenzyme A transferase, mitochondrial precursor	626	849.31	590.31	704.06	821.31	660.32	725.93	1.35673	0.942987	1.1247	1.312	1.05482	1.15963
FGSG_02147	related to ECM14 - involved in cell wall biogenesis and architecture	3345	1691.55	3017.88	2398.69	1702.28	2739.67	1706.71	0.505695	0.902206	0.717097	0.508903	0.819034	0.510227
FGSG_02148	conserved hypothetical protein	410	402.94	359.27	434.83	427.86	344.99	369.61	0.98278	0.876268	1.06056	1.04356	0.841439	0.901488
FGSG_02151	conserved hypothetical protein	364	388.81	261.99	394.19	416.39	351.72	231.91	1.06816	0.719753	1.08294	1.14393	0.966264	0.637115
FGSG_02154	conserved hypothetical protein	44	35.35	66.33	42.67	44.74	45.82	57.98	0.803409	1.5075	0.969773	1.01682	1.04136	1.31773
FGSG_02155	related to integral membrane protein PTH11	68	93.92	120.49	86.36	107.83	74.12	125.62	1.38118	1.77191	1.27	1.58574	1.09	1.84735
FGSG_02158	related to tetracycline resistance proteins	814	541.3	993.8	766.04	558.63	768.13	641.37	0.664988	1.22088	0.941081	0.686278	0.943649	0.787924
FGSG_02159	conserved hypothetical protein	216	73.72	682.06	156.46	74.56	231.79	160.65	0.341296	3.15769	0.724352	0.345185	1.0731	0.74375
FGSG_02160	probable aldehyde dehydrogenase	1254	987.67	2189.9	1015.97	899.32	1175.11	1325.02	0.787616	1.74633	0.810183	0.717161	0.937089	1.05663
FGSG_02162	conserved hypothetical protein	1652	628.15	1900.27	1572.71	713.49	1949.98	995.28	0.380236	1.15028	0.952004	0.431895	1.18038	0.60247
FGSG_02163	probable sulfate permease II	6077	3533.58	5731.77	5358.2	3740.65	6255.57	5400.35	0.581468	0.943191	0.881718	0.615542	1.02938	0.888654
FGSG_02164	hypothetical protein	2852	3860.78	2503.85	3417.71	3788.83	2889.26	1796.09	1.35371	0.877928	1.19836	1.32848	1.01306	0.629765
FGSG_02168	related to ARG8 - acetylornithine aminotransferase	88	99.98	139.29	82.29	81.44	94.33	86.97	1.13614	1.58284	0.935114	0.925455	1.07193	0.988295
FGSG_02169	conserved hypothetical protein	240	76.75	779.34	167.63	96.36	207.53	140.11	0.319792	3.24725	0.698458	0.4015	0.864708	0.583792
FGSG_02170	related to chitinase	491	335.28	332.74	343.4	328.07	389.46	298.34	0.682851	0.677678	0.699389	0.668167	0.793198	0.607617
FGSG_02171	conserved hypothetical protein	3200	1120.97	1595.17	1714.95	1119.56	2530.8	727.13	0.350303	0.498491	0.535922	0.349862	0.790875	0.227228
FGSG_02173	related to covalently-linked cell wall protein	88	112.1	105.02	98.55	133.06	91.64	323.71	1.27386	1.19341	1.11989	1.51205	1.04136	3.67852
FGSG_02178	conserved hypothetical protein	510	542.31	347.11	698.98	527.66	532.3	448.12	1.06335	0.680608	1.37055	1.03463	1.04373	0.878667
FGSG_02179	conserved hypothetical protein	187	377.7	239.88	280.41	297.1	132.06	439.66	2.01979	1.28278	1.49952	1.58877	0.706203	2.35112
FGSG_02183	conserved hypothetical protein	88	81.8	55.27	96.52	88.33	78.16	61.6	0.929545	0.628068	1.09682	1.00375	0.888182	0.7
FGSG_02184	conserved hypothetical protein	157	156.53	111.65	169.67	159.44	172.49	155.81	0.997006	0.711146	1.0807	1.01554	1.09866	0.99242
FGSG_02185	conserved hypothetical protein	1285	746.3	972.8	1398.98	821.31	1115.81	938.51	0.580778	0.757043	1.0887	0.639152	0.868335	0.730358
FGSG_02186	probable TOB3 (member of AAA-ATPase family)	445	321.14	516.25	487.66	351.01	502.66	642.58	0.721663	1.16011	1.09587	0.788787	1.12957	1.444
FGSG_02189	probable glycosylasparaginase	3131	6605.65	3996.21	3861.69	6350.27	3479.51	4408.7	2.10976	1.27634	1.23337	2.02819	1.11131	1.40808
FGSG_02190	conserved hypothetical protein	4948	9289.92	7037.31	6333.53	8975.95	6186.84	5451.08	1.87751	1.42225	1.28002	1.81406	1.25037	1.10167
FGSG_02191	related to GPI-anchor transamidase complex subunit Gpi16	4169	3923.4	4231.67	3956.17	3770.47	3920.17	3927.97	0.941089	1.01503	0.948949	0.904406	0.940314	0.942185
FGSG_02192	probable U1 snRNP protein	5377	4358.66	3971.89	5495.36	4318.78	5269.12	2637.97	0.810612	0.738681	1.02201	0.803195	0.979937	0.490603
FGSG_02193	conserved hypothetical protein	10186	9232.35	8127.28	11111.6	9687.14	10321.3	6323.16	0.906376	0.797887	1.09087	0.951025	1.01328	0.62077
FGSG_02194	conserved hypothetical protein	146	727.12	149.24	440.93	802.96	148.24	456.57	4.98027	1.02219	3.02007	5.49973	1.01534	3.12719
FGSG_02195	conserved hypothetical protein	201	304.98	145.92	215.38	300.54	198.1	154.61	1.51731	0.72597	1.07154	1.49522	0.985572	0.769204
FGSG_02198	conserved hypothetical protein	885	755.39	548.3	891	848.84	769.48	529.04	0.853548	0.619548	1.00678	0.959141	0.869469	0.597785
FGSG_02199	conserved hypothetical protein	1325	1152.28	1173.99	1418.29	1210.18	1383.99	1157.13	0.869645	0.88603	1.07041	0.913343	1.04452	0.873306
FGSG_02201	conserved hypothetical protein	59	87.86	34.27	84.33	89.47	53.9	59.19	1.48915	0.580847	1.42932	1.51644	0.913559	1.00322
FGSG_02202	probable endoglucanase IV precursor	571	374.67	917.53	631.93	391.16	582.16	2738.22	0.656165	1.60688	1.10671	0.685044	1.01954	4.79548
FGSG_02203	related to glycerate dehydrogenase	477	425.16	551.62	482.58	445.07	710.19	415.5	0.891321	1.15644	1.0117	0.933061	1.48887	0.871069
FGSG_02204	related to serine protease	7681	6836.91	6033.56	8317.71	7205.99	7231.23	5060.94	0.890107	0.785518	1.08289	0.938158	0.941444	0.658891
FGSG_02206	related to agmatinase	61	107.05	163.61	59.94	117	61.99	241.57	1.75492	2.68213	0.982623	1.91803	1.01623	3.96016
FGSG_02207	related to ethionine resistance protein	70	229.24	170.24	120.9	251.21	110.5	282.64	3.27486	2.432	1.72714	3.58871	1.57857	4.03771
FGSG_02210	conserved hypothetical protein	2302	1633.99	3196.97	2410.89	1698.83	2542.92	2285.27	0.709813	1.38878	1.0473	0.73798	1.10466	0.992732
FGSG_02211	conserved hypothetical protein	356	609.97	455.45	424.67	510.45	351.72	547.16	1.7134	1.27935	1.19289	1.43385	0.987978	1.53697
FGSG_02212	related to BCS1 - mitochondrial protein of the AAA family of ATPases	906	702.88	743.97	818.87	700.87	722.31	513.34	0.775806	0.821159	0.90383	0.773587	0.797252	0.5666
FGSG_02213	conserved hypothetical protein	95	114.12	80.7	147.32	86.03	105.11	90.59	1.20126	0.849474	1.55074	0.905579	1.10642	0.953579
FGSG_02214	conserved hypothetical protein	37	96.95	46.43	36.57	95.21	45.82	51.94	2.62027	1.25486	0.988378	2.57324	1.23838	1.40378
FGSG_02215	conserved hypothetical protein	477	581.69	631.21	667.49	593.04	482.44	798.4	1.21948	1.32329	1.39935	1.24327	1.0114	1.67379
FGSG_02216	related to lipoxygenase 1	425	419.1	6606.18	362.7	307.42	230.44	330.95	0.986118	15.544	0.853412	0.723341	0.542212	0.778706
FGSG_02217	related to srpA precursor	139	229.24	663.27	150.36	217.95	109.16	166.68	1.64921	4.77173	1.08173	1.56799	0.785324	1.19914
FGSG_02220	related to aldehyde dehydrogenase (NAD+), mitochondrial	3739	6267.34	6070.04	4372.72	6562.48	3592.71	6092.46	1.67621	1.62344	1.16949	1.75514	0.960875	1.62944
FGSG_02221	putative protein [EST hit]	1060	627.14	656.64	824.96	653.84	1065.95	321.29	0.591642	0.619472	0.778264	0.61683	1.00561	0.303104
FGSG_02223	conserved hypothetical protein	117	157.54	102.81	149.35	146.83	134.76	102.67	1.3465	0.878718	1.2765	1.25496	1.15179	0.877521
FGSG_02224	conserved hypothetical protein	1507	1806.68	1288.96	1471.12	1964.96	1416.33	1228.4	1.19886	0.855315	0.976191	1.30389	0.939834	0.815129
FGSG_02225	conserved hypothetical protein	3764	3943.59	3227.92	4273.15	4037.74	3965.99	1992.97	1.04771	0.857577	1.13527	1.07273	1.05366	0.529482
FGSG_02228	conserved hypothetical protein	159	309.02	160.29	210.3	295.95	141.5	200.51	1.94352	1.00811	1.32264	1.86132	0.889937	1.26107
FGSG_02230	conserved hypothetical protein	1171	1323.96	1208.26	1204.94	1437.3	1313.91	1077.41	1.13062	1.03182	1.02898	1.22741	1.12204	0.920077
FGSG_02231	conserved hypothetical protein	761	1159.35	808.09	782.29	1158.56	770.83	821.35	1.52346	1.06188	1.02798	1.52242	1.01292	1.0793
FGSG_02232	conserved hypothetical protein	10128	9801.93	9429.51	10725.5	9667.64	10120.5	8802.9	0.967805	0.931034	1.059	0.954546	0.999258	0.869165
FGSG_02233	related to protein carrier KAP123	7227	8187.12	8031.11	7347.46	8431.08	7078.95	9071.04	1.13285	1.11126	1.01667	1.16661	0.979514	1.25516
FGSG_02234	conserved hypothetical protein	2047	3873.91	2835.48	2432.22	3692.47	2110.34	3408.59	1.89248	1.38519	1.18819	1.80384	1.03094	1.66516
FGSG_02235	conserved hypothetical protein	220	515.04	351.53	290.57	481.78	237.18	372.02	2.34109	1.59786	1.32077	2.18991	1.07809	1.691
FGSG_02236	probable Modin	3395	2591.36	3088.63	3581.28	2544.24	3354.18	3006.37	0.763287	0.909758	1.05487	0.749408	0.987976	0.885529
FGSG_02237	related to CDC4 - cell division control protein	11890	9899.89	11215.9	11620.6	10159.7	12059.7	10625.6	0.832623	0.943307	0.977343	0.854478	1.01427	0.893655
FGSG_02238	conserved hypothetical protein	1573	2453.01	1879.27	1784.04	2441	1560.52	2293.73	1.55945	1.1947	1.13416	1.55181	0.992066	1.45819
FGSG_02240	conserved hypothetical protein	2621	3176.08	3177.07	2703.48	3394.23	2928.34	4575.38	1.21178	1.21216	1.03147	1.29501	1.11726	1.74566
FGSG_02241	hypothetical protein	195	146.43	154.76	219.45	115.86	171.15	352.7	0.750923	0.793641	1.12538	0.594154	0.877692	1.80872
FGSG_02242	hypothetical protein	457	384.77	381.38	556.75	387.72	423.15	905.9	0.841947	0.83453	1.21827	0.848403	0.92593	1.98228
FGSG_02243	hypothetical protein	339	239.34	278.57	365.75	258.09	319.38	640.17	0.706018	0.82174	1.07891	0.761327	0.942124	1.88841
FGSG_02244	related to cytosolic nonspecific dipeptidase	2965	3682.03	3266.61	3097.68	3778.5	3467.38	3895.35	1.24183	1.10172	1.04475	1.27437	1.16944	1.31378
FGSG_02245	conserved hypothetical protein	3331	2741.83	2906.23	2765.46	2948.01	2995.72	2691.12	0.823125	0.87248	0.830219	0.885023	0.899346	0.807902
FGSG_02246	hypothetical protein	511	327.2	280.78	542.53	354.45	462.23	294.72	0.640313	0.549472	1.0617	0.69364	0.90456	0.576751
FGSG_02247	related to 1-acyldihydroxyacetone-phosphate reductase	1744	1725.89	1979.86	1619.45	1725.22	1772.1	1544.86	0.989616	1.13524	0.928584	0.989232	1.01611	0.885814
FGSG_02248	related to zinc transporter	3881	4484.89	4814.24	5139.77	4783.35	3294.89	8438.12	1.1556	1.24046	1.32434	1.2325	0.84898	2.17421
FGSG_02249	conserved hypothetical protein	2853	2175.29	3623.67	3433.96	2380.2	2623.78	7765.34	0.762457	1.27013	1.20363	0.83428	0.919657	2.72182
FGSG_02251	related to nonribosomal peptide synthetase MxcG (component of the myxochelin iron transport regul	729	884.66	826.88	613.64	812.14	661.67	1111.23	1.21353	1.13427	0.841756	1.11405	0.907641	1.52432
FGSG_02252	probable SIT1 - Transporter of the bacterial siderophore ferrioxamine B	617	606.94	579.26	616.69	535.69	524.22	744.04	0.983695	0.938833	0.999498	0.868217	0.849627	1.2059
FGSG_02253	hypothetical protein	361	706.92	297.37	456.17	689.4	288.39	253.65	1.95823	0.82374	1.26363	1.9097	0.798864	0.702632
FGSG_02254	conserved hypothetical protein	83	87.86	60.8	68.07	91.77	78.16	47.11	1.05855	0.73253	0.82012	1.10566	0.941687	0.56759
FGSG_02257	conserved hypothetical protein	493	658.44	945.16	625.83	687.1	664.37	1489.29	1.33558	1.91716	1.26943	1.39371	1.34761	3.02087
FGSG_02259	related to ATP adenylyltransferase II	71	163.6	116.07	97.53	144.53	80.86	150.98	2.30423	1.63479	1.37366	2.03563	1.13887	2.12648
FGSG_02260	hypothetical protein	2477	4759.58	3473.33	3385.2	4689.29	6270.39	3781.82	1.92151	1.40223	1.36665	1.89313	2.53145	1.52677
FGSG_02262	conserved hypothetical protein	1437	1056.34	1374.08	1250.65	1164.29	1575.35	1407.16	0.735101	0.956214	0.87032	0.810223	1.09628	0.979235
FGSG_02263	conserved hypothetical protein	1152	706.92	663.27	375.91	720.37	638.76	177.56	0.613646	0.575755	0.326311	0.625321	0.554479	0.154132
FGSG_02264	related to cholin permease	850	1471.4	1612.85	846.3	1547.42	1030.92	1447.02	1.73106	1.89747	0.995647	1.82049	1.21285	1.70238
FGSG_02267	related to 15-hydroxyprostaglandin dehydrogenase	234	301.96	312.84	261.1	267.27	234.48	489.18	1.29043	1.33692	1.11581	1.14218	1.00205	2.09051
FGSG_02268	conserved hypothetical protein	336	270.65	261.99	460.23	239.74	265.48	496.43	0.805506	0.779732	1.36973	0.713512	0.790119	1.47747
FGSG_02269	conserved hypothetical protein	162	159.56	228.83	174.75	154.86	214.27	288.68	0.984938	1.41253	1.0787	0.955926	1.32265	1.78198
FGSG_02270	conserved hypothetical protein	210	298.93	203.4	250.94	294.8	206.18	199.3	1.42348	0.968571	1.19495	1.40381	0.98181	0.949048
FGSG_02272	related to HNM1 - choline permease	954	1157.33	1297.8	819.88	1188.38	1010.7	1467.55	1.21313	1.36038	0.859413	1.24568	1.05943	1.53831
FGSG_02273	probable aldehyde dehydrogenase	173	104.02	275.26	154.43	110.12	123.98	78.51	0.601272	1.5911	0.892659	0.636532	0.716647	0.453815
FGSG_02274	conserved hypothetical protein	44	27.27	78.49	122.93	47.03	36.39	121.99	0.619773	1.78386	2.79386	1.06886	0.827045	2.7725
FGSG_02275	conserved hypothetical protein	603	301.96	400.17	612.63	403.77	485.14	449.32	0.500763	0.663632	1.01597	0.669602	0.804544	0.745141
FGSG_02276	hypothetical protein	385	302.96	454.34	392.16	385.42	415.06	430	0.786909	1.1801	1.0186	1.00109	1.07808	1.11688
FGSG_02278	related to HNM1 - Choline permease	57	48.47	403.49	31.49	48.18	26.95	41.07	0.850351	7.07877	0.552456	0.845263	0.472807	0.720526
FGSG_02279	related to peroxisomal amine oxidase (copper-containing)	598	357.5	1156.3	383.02	332.65	556.56	231.91	0.597826	1.93361	0.640502	0.556271	0.930702	0.387809
FGSG_02280	related to cis-1,2-dihydro-1,2-dihydroxynaphthalene dehydrogenase	214	175.72	348.22	230.62	183.53	257.39	225.87	0.821121	1.6272	1.07766	0.857617	1.20276	1.05547
FGSG_02281	related to C4-dicarboxylate transport protein mae1	39	132.29	48.64	66.04	149.12	39.08	78.51	3.39205	1.24718	1.69333	3.82359	1.00205	2.01308
FGSG_02282	conserved hypothetical protein	490	527.16	465.4	440.93	478.33	455.49	355.11	1.07584	0.949796	0.899857	0.976184	0.929571	0.724714
FGSG_02284	conserved hypothetical protein	3971	2424.73	3987.37	3348.62	2576.36	3370.35	3942.46	0.610609	1.00412	0.843269	0.648794	0.848741	0.992813
FGSG_02285	conserved hypothetical protein	140	169.66	275.26	181.86	170.92	183.27	416.71	1.21186	1.96614	1.299	1.22086	1.30907	2.9765
FGSG_02286	conserved hypothetical protein	677	875.57	591.42	755.88	801.81	605.07	659.49	1.29331	0.873589	1.11651	1.18436	0.893752	0.974136
FGSG_02287	related to POX1 - acyl-CoA oxidase	1864	1527.95	2433.1	1783.02	1562.33	1720.89	1017.02	0.819716	1.30531	0.956556	0.83816	0.923224	0.545612
FGSG_02288	related to ECM32 - DNA dependent ATPase/DNA helicase B	6801	6814.69	5408.98	6889.26	6865.31	6446.93	5420.88	1.00201	0.795321	1.01298	1.00946	0.947939	0.797071
FGSG_02289	conserved hypothetical protein	65	50.49	99.49	58.93	63.09	88.94	31.4	0.776769	1.53062	0.906615	0.970615	1.36831	0.483077
FGSG_02290	conserved hypothetical protein	108	112.1	138.18	84.33	119.3	111.85	165.48	1.03796	1.27944	0.780833	1.10463	1.03565	1.53222
FGSG_02291	related to ADH5 - alcohol dehydrogenase V	136	290.85	258.68	119.88	297.1	165.76	282.64	2.1386	1.90206	0.881471	2.18456	1.21882	2.07824
FGSG_02293	conserved hypothetical protein	118	167.64	96.17	133.09	166.33	125.33	134.07	1.42068	0.815	1.12788	1.40958	1.06212	1.13619
FGSG_02294	conserved hypothetical protein	35	64.63	59.69	41.65	66.53	44.47	53.15	1.84657	1.70543	1.19	1.90086	1.27057	1.51857
FGSG_02305	related to amidohydrolase AmhX	151	208.04	215.56	146.3	182.39	164.41	251.24	1.37775	1.42755	0.968874	1.20788	1.08881	1.66384
FGSG_02306	related to proline oxidase	35	36.36	30.95	23.37	32.12	26.95	37.44	1.03886	0.884286	0.667714	0.917714	0.77	1.06971
FGSG_02307	conserved hypothetical protein	1116	1184.59	1260.22	1034.25	1350.12	1057.87	1431.32	1.06146	1.12923	0.926747	1.20978	0.947912	1.28254
FGSG_02308	related to alanine racemase	1786	1557.24	2013.03	1871.41	1713.75	1807.13	1884.26	0.871915	1.12712	1.04782	0.959546	1.01183	1.05502
FGSG_02309	conserved hypothetical protein	726	542.31	749.5	716.26	642.37	773.52	893.82	0.746983	1.03237	0.986584	0.884807	1.06545	1.23116
FGSG_02310	conserved hypothetical protein	2407	3169.01	2236.33	2304.21	3139.57	2656.12	2107.72	1.31658	0.929094	0.957295	1.30435	1.1035	0.875663
FGSG_02312	related to maltose permease (MalP)	97	104.02	130.44	135.12	120.44	111.85	179.97	1.07237	1.34474	1.39299	1.24165	1.15309	1.85536
FGSG_02313	conserved hypothetical protein	112	148.45	135.97	114.8	154.86	111.85	167.89	1.32545	1.21402	1.025	1.38268	0.998661	1.49902
FGSG_02314	related to beta-mannosidase	4207	4463.68	7653.05	5140.79	4704.2	3646.61	11119.6	1.06101	1.81912	1.22196	1.11818	0.866796	2.64311
FGSG_02315	related to non-ribosomal peptide synthetase	1374	2024.82	1277.9	1814.51	1510.71	1416.33	2663.34	1.47367	0.930058	1.3206	1.0995	1.03081	1.93838
FGSG_02316	related to multidrug resistance protein	146	245.4	206.72	163.57	212.21	159.02	225.87	1.68082	1.41589	1.12034	1.45349	1.08918	1.54705
FGSG_02317	conserved hypothetical protein	12274	12412.5	13009	12788	12860	12652.6	17026	1.01128	1.05988	1.04187	1.04774	1.03085	1.38716
FGSG_02318	conserved hypothetical protein	579	414.05	856.73	741.65	427.86	446.06	2234.54	0.715112	1.47967	1.28092	0.738964	0.770397	3.85931
FGSG_02319	conserved hypothetical protein	101	66.65	131.55	132.08	95.21	99.72	387.72	0.659901	1.30248	1.30772	0.942673	0.987327	3.83881
FGSG_02321	oxidoreductase that catalyses the conversion of dimeric 9-hydroxyrubrofusarin to aurofusarin	333	322.15	338.27	272.28	338.39	311.3	217.42	0.967417	1.01583	0.817658	1.01619	0.934835	0.652913
FGSG_02322	aurofusarin/rubrofusarin efflux pump AFLT	182	208.04	185.72	159.51	208.77	191.36	154.61	1.14308	1.02044	0.876429	1.14709	1.05143	0.849505
FGSG_02323	binuclear zinc cluster transcription factor that regulates the ratio between aurofusarin and rubr	99	124.22	145.92	111.76	145.68	109.16	126.83	1.25475	1.47394	1.12889	1.47152	1.10263	1.28111
FGSG_02324	polyketide synthase that catalyse the condensation of one acetyl-CoA and six malonyl-CoA resultin	1069	1185.6	937.42	1504.65	1080.56	1309.87	1532.78	1.10907	0.876913	1.40753	1.01081	1.22532	1.43384
FGSG_02325	conserved hypothetical protein	251	783.67	379.17	388.1	690.55	471.66	235.53	3.12219	1.51064	1.54622	2.7512	1.87912	0.938367
FGSG_02326	o-methyltransferase that catalyse the methylation of nor-rubrofusarin resulting in formation of r	36	50.49	27.64	36.57	36.71	48.51	48.31	1.4025	0.767778	1.01583	1.01972	1.3475	1.34194
FGSG_02327	flavin depend monooxygenase that catalyses the oxidation of rubrofusarin to 9-hydroxyrubrofusarin	42	122.2	60.8	55.88	117	68.73	100.25	2.90952	1.44762	1.33048	2.78571	1.63643	2.3869
FGSG_02328	laccase that catalyse the dimerization of two 9-hydroxyrubrofusarin in C7 positions	51	71.7	48.64	50.8	81.44	87.59	67.64	1.40588	0.953725	0.996078	1.59686	1.71745	1.32627
FGSG_02330	related to laccase precursor	40	40.4	85.12	69.09	47.03	59.29	97.84	1.01	2.128	1.72725	1.17575	1.48225	2.446
FGSG_02332	conserved hypothetical protein	222	624.11	580.36	295.65	700.87	349.03	634.13	2.81131	2.61423	1.33176	3.15707	1.57221	2.85644
FGSG_02333	hypothetical protein	84	114.12	129.34	99.56	115.86	117.24	152.19	1.35857	1.53976	1.18524	1.37929	1.39571	1.81179
FGSG_02334	related to integral membrane protein PTH11	61	108.06	76.28	67.05	89.47	87.59	62.81	1.77148	1.25049	1.09918	1.46672	1.4359	1.02967
FGSG_02335	conserved hypothetical protein	2980	2715.58	3866.87	2531.79	2788.57	2968.77	3035.36	0.911268	1.29761	0.849594	0.935762	0.996232	1.01858
FGSG_02336	conserved hypothetical protein	78	172.69	130.44	109.72	181.24	103.77	141.32	2.21397	1.67231	1.40667	2.32359	1.33038	1.81179
FGSG_02337	conserved hypothetical protein	137	382.75	181.29	174.75	376.24	247.96	125.62	2.7938	1.32328	1.27555	2.74628	1.80993	0.916934
FGSG_02339	related to SUC2 - invertase (sucrose hydrolyzing enzyme)	3197	3234.66	2742.63	2462.7	2884.92	2677.68	3311.96	1.01178	0.857876	0.770316	0.902383	0.83756	1.03596
FGSG_02341	related to chloroperoxidase	36	54.53	37.59	40.64	52.77	39.08	24.16	1.51472	1.04417	1.12889	1.46583	1.08556	0.671111
FGSG_02343	related to potential drug facilitator PEP5	34	111.09	54.17	39.62	104.38	36.39	65.22	3.26735	1.59324	1.16529	3.07	1.07029	1.91824
FGSG_02346	probable c-14 sterol reductase ERG-3	1495	1873.33	1546.53	1608.27	1984.46	1443.28	1727.24	1.25306	1.03447	1.07577	1.3274	0.965405	1.15534
FGSG_02347	probable homogentisate 1,2-dioxygenase	143	120.18	173.56	137.16	87.18	123.98	129.24	0.84042	1.21371	0.959161	0.60965	0.866993	0.903776
FGSG_02349	probable tyrosine-tRNA ligase	305	534.23	235.46	347.46	479.48	280.3	198.09	1.75157	0.772	1.13921	1.57207	0.919016	0.649475
FGSG_02351	conserved hypothetical protein	142	249.44	180.19	155.44	266.12	123.98	375.65	1.75662	1.26894	1.09465	1.87408	0.873099	2.64542
FGSG_02352	related to CIT2 - citrate (si)-synthase, peroxisomal	1545	1276.49	3085.32	1596.08	1351.27	1803.09	2508.73	0.826207	1.99697	1.03306	0.874608	1.16705	1.62377
FGSG_02353	conserved hypothetical protein	193	202.99	260.89	193.03	214.51	312.64	301.97	1.05176	1.35176	1.00016	1.11145	1.6199	1.56461
FGSG_02354	conserved hypothetical protein	21827	61944.2	39936.7	23995.1	55926.2	41790.5	53211.2	2.83796	1.82969	1.09933	2.56225	1.91462	2.43786
FGSG_02355	related to dTDP-glucose 4,6-dehydratase	3453	5319.06	4059.22	4409.29	4809.73	3715.34	6104.53	1.54042	1.17556	1.27694	1.39291	1.07597	1.76789
FGSG_02358	probable alpha-glucoside transport protein	953	939.19	1472.46	975.33	918.82	954.1	1689.8	0.985509	1.54508	1.02343	0.964134	1.00115	1.77314
FGSG_02363	conserved hypothetical protein	171	303.97	367.01	240.78	326.92	167.1	462.61	1.7776	2.14626	1.40807	1.91181	0.977193	2.70532
FGSG_02364	conserved hypothetical protein	1967	2797.38	3212.44	2442.38	2918.19	2098.22	3720.21	1.42216	1.63317	1.24168	1.48357	1.06671	1.89131
FGSG_02366	related to sterigmatocystin biosynthesis P450 monooxygenase STCS	53	33.33	46.43	41.65	45.88	70.08	43.48	0.628868	0.876038	0.785849	0.86566	1.32226	0.820377
FGSG_02368	related to fungal specific transcription factor	439	382.75	281.89	722.35	378.54	365.2	330.95	0.871868	0.642118	1.64544	0.862278	0.831891	0.753872
FGSG_02373	putative protein [EST hit]	3749	6545.05	6051.25	4650.07	6174.76	4003.72	7295.49	1.74581	1.6141	1.24035	1.64704	1.06794	1.94598
FGSG_02375	hypothetical protein	842	2166.2	1144.14	1033.24	1857.13	819.34	1601.62	2.57268	1.35884	1.22713	2.20562	0.973088	1.90216
FGSG_02379	related to acyl-CoA dehydrogenase, medium-chain specific, mitochondrial precursor	746	500.9	772.71	667.49	461.13	710.19	736.8	0.671448	1.0358	0.894759	0.618137	0.951997	0.987668
FGSG_02380	hypothetical protein	80	92.91	40.9	107.69	84.88	86.25	102.67	1.16138	0.51125	1.34613	1.061	1.07812	1.28337
FGSG_02381	conserved hypothetical protein	932	633.2	764.97	403.34	560.93	924.45	111.12	0.679399	0.820783	0.432768	0.601856	0.991899	0.119227
FGSG_02382	related to putative tartrate transporter	171	261.56	446.6	230.62	290.21	221.01	658.28	1.52959	2.6117	1.34865	1.69713	1.29246	3.84959
FGSG_02383	related to AAH1 - adenosine deaminase	69	121.19	100.6	89.4	95.21	75.47	96.63	1.75638	1.45797	1.29565	1.37986	1.09377	1.40043
FGSG_02385	conserved hypothetical protein	164	20.2	99.49	120.9	29.82	149.58	37.44	0.123171	0.606646	0.737195	0.181829	0.912073	0.228293
FGSG_02387	conserved hypothetical protein	317	412.03	433.34	387.08	372.8	318.03	629.3	1.29978	1.367	1.22107	1.17603	1.00325	1.98517
FGSG_02389	conserved hypothetical protein	65	38.38	116.07	161.54	57.35	53.9	195.67	0.590462	1.78569	2.48523	0.882308	0.829231	3.01031
FGSG_02390	conserved hypothetical protein	119	97.96	128.23	104.64	97.5	133.41	113.54	0.823193	1.07756	0.879328	0.819328	1.12109	0.954118
FGSG_02392	probable aldehyde dehydrogenase	4672	9691.85	6227.01	4466.18	8705.24	4412.05	9620.62	2.07445	1.33284	0.955946	1.86328	0.94436	2.05921
FGSG_02394	related to AM-toxin synthetase (AMT)	147	169.66	151.45	192.02	126.18	144.19	213.79	1.15415	1.03027	1.30626	0.858367	0.980884	1.45435
FGSG_02398	conserved hypothetical protein	242	144.41	665.48	327.14	167.47	308.6	333.37	0.596736	2.74992	1.35182	0.692025	1.27521	1.37756
FGSG_02400	probable calcium P-type ATPase NCA-3 [Ca2+-transporting ATPase]	12073	6481.43	11801.8	11171.6	7286.29	12915.4	15767.4	0.536853	0.977537	0.925334	0.603519	1.06978	1.30601
FGSG_02403	probable thioredoxin	1055	1316.89	1317.7	1095.21	1355.86	1141.42	1468.76	1.24824	1.249	1.03811	1.28518	1.08191	1.39219
FGSG_02406	related to tetracycline resistance proteins	815	1092.69	881.05	862.55	1151.67	839.56	971.12	1.34072	1.08104	1.05834	1.41309	1.03013	1.19156
FGSG_02407	related to D-mandelate dehydrogenase	454	507.97	523.98	478.52	426.72	470.31	411.88	1.11888	1.15414	1.05401	0.939912	1.03593	0.907225
FGSG_02409	related to small s protein	184	247.42	315.05	205.23	254.65	168.45	572.53	1.34467	1.71223	1.11538	1.38397	0.915489	3.11158
FGSG_02414	conserved hypothetical protein	1407	1505.74	2288.29	1799.28	1625.42	1474.28	3773.36	1.07018	1.62636	1.27881	1.15524	1.04782	2.68185
FGSG_02415	conserved hypothetical protein	1375	1702.66	1662.6	1251.67	1717.19	1288.31	2508.73	1.2383	1.20916	0.910305	1.24887	0.936953	1.82453
FGSG_02418	conserved hypothetical protein	57	97.96	67.43	79.25	83.74	90.29	93.01	1.7186	1.18298	1.39035	1.46912	1.58404	1.63175
FGSG_02419	related to pisatin demethylase	488	467.58	383.59	507.98	476.04	489.18	289.89	0.958156	0.786045	1.04094	0.975492	1.00242	0.594037
FGSG_02420	conserved hypothetical protein	2651	2320.71	3056.58	2480.99	2504.09	2623.78	3146.48	0.875409	1.15299	0.935869	0.944583	0.989732	1.1869
FGSG_02421	conserved hypothetical protein	641	711.97	567.1	694.92	646.96	743.88	884.15	1.11072	0.884711	1.08412	1.0093	1.1605	1.37933
FGSG_02422	related to spore coat protein SP96 precursor	1066	2308.59	1369.66	1872.42	2212.73	2816.49	2848.14	2.16566	1.28486	1.75649	2.07573	2.64211	2.6718
FGSG_02423	conserved hypothetical protein	538	586.74	438.86	472.42	567.81	544.43	324.91	1.09059	0.815725	0.878104	1.05541	1.01195	0.603922
FGSG_02426	probable PHO89 - Na+/phosphate co-transporter	3269	572.6	8074.22	7273.3	478.33	3466.03	26951	0.175161	2.46994	2.22493	0.146323	1.06027	8.24442
FGSG_02427	conserved hypothetical protein	1294	1153.29	1228.16	1238.46	1140.2	1514.7	1002.53	0.89126	0.949119	0.957079	0.881144	1.17056	0.774753
FGSG_02428	conserved hypothetical protein	683	1090.67	752.81	885.92	1074.82	877.29	751.29	1.59688	1.10221	1.2971	1.57367	1.28447	1.09999
FGSG_02429	conserved hypothetical protein	216	1121.98	329.42	313.93	1190.68	249.31	808.06	5.19435	1.52509	1.45338	5.51241	1.15421	3.74102
FGSG_02432	related to formaldehyde dehydrogenase	4716	9117.23	4948	4912.19	8642.15	4624.97	7417.48	1.93325	1.04919	1.0416	1.83252	0.980698	1.57283
FGSG_02433	related to putidaredoxin reductase	13990	13546.6	13984	12528.9	13544.8	15044.6	13975	0.968304	0.999569	0.89556	0.968177	1.07538	0.998925
FGSG_02434	conserved hypothetical protein	7407	8032.61	7567.93	8214.08	8068.6	8008.8	9598.88	1.08446	1.02173	1.10896	1.08932	1.08125	1.29592
FGSG_02438	conserved hypothetical protein	2545	3246.77	2845.43	2681.13	3212.99	2378.52	2884.37	1.27574	1.11805	1.05349	1.26247	0.934585	1.13335
FGSG_02439	related to GABA permease	7065	7292.37	6743.26	7238.76	7060.31	6832.34	5405.18	1.03218	0.95446	1.02459	0.999336	0.967069	0.765064
FGSG_02440	conserved hypothetical protein	1950	1915.75	1871.53	1830.77	1862.87	1975.58	1720	0.982436	0.959759	0.938856	0.955318	1.01312	0.882051
FGSG_02441	conserved hypothetical protein	2094	1534.01	2026.29	1715.97	1691.95	1817.91	1820.25	0.732574	0.967665	0.81947	0.807999	0.868152	0.869269
FGSG_02442	related to sporulation-specific protein Sps2p	574	735.2	600.26	666.47	784.61	570.04	874.49	1.28084	1.04575	1.1611	1.36692	0.993101	1.5235
FGSG_02443	conserved hypothetical protein	46	63.62	39.8	62.99	48.18	37.73	54.35	1.38304	0.865217	1.36935	1.04739	0.820217	1.18152
FGSG_02444	conserved hypothetical protein	301	314.07	316.16	456.17	306.27	295.12	315.25	1.04342	1.05037	1.51551	1.01751	0.980465	1.04734
FGSG_02446	conserved hypothetical protein	1874	1624.9	1736.67	1747.46	1664.42	1714.15	2095.64	0.867076	0.926718	0.932476	0.888164	0.914701	1.11827
FGSG_02447	conserved hypothetical protein	268	219.14	154.76	201.16	207.62	192.71	320.08	0.817687	0.577463	0.750597	0.774701	0.719067	1.19433
FGSG_02448	conserved hypothetical protein	376	364.57	217.77	452.1	367.07	354.42	230.7	0.969601	0.579176	1.20239	0.97625	0.942606	0.613564
FGSG_02449	related to nik-1 protein (Os-1p protein)	1301	948.28	1444.83	1287.23	1010.58	1348.95	1354.01	0.728885	1.11055	0.989416	0.776772	1.03686	1.04075
FGSG_02451	hypothetical protein	458	482.72	292.94	574.02	440.48	458.18	227.08	1.05397	0.639607	1.25332	0.961747	1.00039	0.495808
FGSG_02452	conserved hypothetical protein	432	391.83	420.07	551.67	435.89	413.71	363.57	0.907014	0.972384	1.27701	1.009	0.957662	0.841597
FGSG_02454	related to THI80 - thiamin pyrophosphokinase	2352	3606.29	2575.7	2275.76	3445.85	2185.81	2938.73	1.53329	1.09511	0.967585	1.46507	0.929341	1.24946
FGSG_02455	related to mitochondrial intermembrane space protein Mia40	2495	2324.75	2384.46	2447.46	2449.03	2428.38	2036.46	0.931764	0.955695	0.980946	0.981575	0.973299	0.816216
FGSG_02459	conserved hypothetical protein	249	249.44	223.3	255.01	314.3	304.56	184.8	1.00177	0.896787	1.02414	1.26225	1.22313	0.742169
FGSG_02460	probable SPF1 - P-type ATPase - unknown function	10628	10225.1	11829.4	9827.44	10368.5	10514	10446.8	0.962088	1.11304	0.924674	0.975584	0.989273	0.982951
FGSG_02461	probable MDH1 - malate dehydrogenase precursor, mitochondrial	19785	20888.4	18861.2	21012.2	21601.9	18443.3	17552.7	1.05577	0.953309	1.06203	1.09183	0.932185	0.88717
FGSG_02462	conserved hypothetical protein	3289	3274.04	2950.45	3049.93	3450.43	3393.26	2681.45	0.995452	0.897066	0.927312	1.04908	1.0317	0.815278
FGSG_02463	conserved hypothetical protein	2199	2344.95	2197.64	2359.07	2462.79	2276.1	1972.44	1.06637	0.999382	1.07279	1.11996	1.03506	0.896971
FGSG_02464	conserved hypothetical protein	3820	4641.42	5024.28	4077.07	4988.68	3670.87	6796.64	1.21503	1.31526	1.0673	1.30594	0.960961	1.77923
FGSG_02465	conserved hypothetical protein	394	719.04	332.74	796.52	715.78	253.35	469.86	1.82497	0.844518	2.02162	1.8167	0.64302	1.19254
FGSG_02467	related to isopenicillin N epimerase	1514	1932.92	1714.56	1661.1	2359.56	1401.51	1852.86	1.2767	1.13247	1.09716	1.55849	0.9257	1.22382
FGSG_02468	conserved hypothetical protein	483	361.54	590.31	645.14	409.51	436.62	834.63	0.74853	1.22217	1.33569	0.847847	0.903975	1.72801
FGSG_02469	probable CyPBP37 protein (protein binding to CyP41)	4534	2150.04	5058.55	3721.48	2403.15	4887.75	6754.36	0.474204	1.11569	0.820794	0.530029	1.07802	1.48971
FGSG_02470	probable replication licensing factor	6154	6217.85	5887.64	6151.67	6222.94	6062.86	5298.89	1.01038	0.956718	0.999621	1.0112	0.98519	0.861048
FGSG_02471	related to transcription factor medusa	7540	6597.57	6898.02	7649.21	6483.33	7678.63	10838.1	0.875009	0.914857	1.01448	0.859858	1.01839	1.43742
FGSG_02472	conserved hypothetical protein	11856	11467.2	12028.4	12989.1	11669.3	13927.5	14052.3	0.967209	1.01454	1.09557	0.984254	1.17472	1.18525
FGSG_02473	probable mitochondrial ATP synthase subunit f	5271	5856.31	5599.12	5271.85	5806.55	5092.59	4957.07	1.11104	1.06225	1.00016	1.1016	0.966153	0.940442
FGSG_02474	probable NADH-ubiquinone oxidoreductase 21 kDa subunit, mitochondrial precursor	2987	3002.38	3264.4	2935.12	3095.99	2956.64	3123.53	1.00515	1.09287	0.982631	1.03649	0.989836	1.04571
FGSG_02476	probable uridine kinase	3369	2657	2904.02	2924.97	2591.27	3243.68	2025.58	0.788661	0.861983	0.868201	0.769151	0.962802	0.601241
FGSG_02477	probable NADH dehydrogenase (ubiquinone), 64 kD subunit, mitochondrial	4907	4278.88	4005.05	3703.19	4165.07	4263.81	3030.53	0.871995	0.816191	0.754675	0.848802	0.868924	0.617593
FGSG_02478	related to myosin heavy chain proteins	1668	2009.67	1824	1850.07	2067.05	1635.99	1619.74	1.20484	1.09353	1.10915	1.23924	0.980809	0.971067
FGSG_02479	probable Ras-related protein Rab-6A	4594	4742.41	4722.49	4106.53	4893.47	4505.03	4141.76	1.03231	1.02797	0.89389	1.06519	0.980633	0.901559
FGSG_02481	conserved hypothetical protein	2451	2649.93	2787.95	2586.65	2685.33	2657.47	2959.26	1.08116	1.13747	1.05534	1.09561	1.08424	1.20737
FGSG_02482	probable sulfite reductase (NADPH)	12613	9865.55	13055.4	11017.1	10030.1	13323.7	8958.71	0.782173	1.03507	0.873474	0.795221	1.05635	0.710276
FGSG_02484	conserved hypothetical protein	5611	4407.13	5418.93	4228.45	4516.08	5115.5	4045.13	0.785445	0.965769	0.7536	0.804862	0.911691	0.720929
FGSG_02485	conserved hypothetical protein	1433	1425.96	1102.14	1658.06	1406.33	1374.55	996.49	0.995087	0.769114	1.15706	0.981389	0.959211	0.695387
FGSG_02486	related to anthranilate synthase component II	2386	1645.1	1653.76	2316.4	1710.31	1866.43	2207.97	0.68948	0.69311	0.97083	0.716811	0.782242	0.925386
FGSG_02487	hypothetical protein	123	500.9	169.13	144.27	552.9	289.73	171.52	4.07236	1.37504	1.17293	4.49512	2.35553	1.39447
FGSG_02488	related to dis1-suppressing protein kinase dsk1	2400	3109.43	3106.32	2811.18	3233.64	2537.53	2334.8	1.2956	1.2943	1.17132	1.34735	1.0573	0.972833
FGSG_02489	conserved hypothetical protein	1156	1341.13	1275.69	1181.57	1330.62	985.1	1373.34	1.16015	1.10354	1.02212	1.15106	0.852163	1.18801
FGSG_02490	conserved hypothetical protein	4921	4736.35	4427.34	6542.82	4575.73	7258.18	7406.61	0.962477	0.899683	1.32957	0.929837	1.47494	1.5051
FGSG_02491	related to enolase-phosphatase E-1	1465	1454.23	1649.33	1421.34	1464.83	1592.87	1578.68	0.992648	1.12582	0.970198	0.999884	1.08728	1.0776
FGSG_02492	conserved hypothetical protein	573	405.97	533.93	561.83	399.19	606.42	414.3	0.708499	0.931815	0.980506	0.696667	1.05832	0.723037
FGSG_02493	probable ribosomal protein L23a, cytosolic	14726	10466.4	13905.5	10999.9	11347	13331.8	7508.07	0.710745	0.944281	0.746969	0.77054	0.905325	0.509851
FGSG_02494	probable mitochondrial import inner membrane translocase subunit TIM8	1258	1473.42	1220.42	1383.75	1465.98	1322	1072.58	1.17124	0.970127	1.09996	1.16533	1.05087	0.852607
FGSG_02495	related to divalent cation transporter (aluminium resistance protein ALR1)	4628	4639.4	4493.66	4904.07	4509.2	4585.89	4287.91	1.00246	0.970972	1.05965	0.97433	0.990901	0.926515
FGSG_02496	related to microsomal signal peptidase 12 kDa subunit	852	1209.84	970.59	944.85	1189.53	950.06	959.04	1.42	1.13919	1.10898	1.39616	1.11509	1.12563
FGSG_02497	probable ring-box protein 1	7406	8579.97	6340.87	8490.42	8330.14	8112.56	6062.26	1.15852	0.85618	1.14642	1.12478	1.0954	0.818561
FGSG_02498	conserved hypothetical protein	14529	15652.2	15827.9	16747.2	16011	16165.8	23390.2	1.07731	1.0894	1.15267	1.102	1.11266	1.6099
FGSG_02499	related to amino acid transport protein	1780	3235.67	2290.5	1860.23	2989.31	1816.57	3289.01	1.81779	1.2868	1.04507	1.67939	1.02054	1.84776
FGSG_02500	conserved hypothetical protein	1064	1164.4	912	1053.56	1163.15	1083.47	741.63	1.09436	0.857143	0.990188	1.09319	1.0183	0.697021
FGSG_02502	probable sterol delta 5,6-desaturase	866	1353.24	996.01	1058.64	1352.41	979.71	1171.63	1.56263	1.15013	1.22245	1.56167	1.1313	1.35292
FGSG_02503	related to ribosomal protein L28	9654	7004.55	9194.05	7161.54	7558.15	8526.28	5211.92	0.725559	0.952357	0.741821	0.782903	0.883186	0.539872
FGSG_02504	probable malate dehydrogenase	28242	31496.2	27866.2	27968.5	31415.2	28633.8	26150.2	1.11523	0.986695	0.990317	1.11236	1.01387	0.925933
FGSG_02506	probable bifunctional purine biosynthetic protein	5113	4812.09	4558.88	4938.61	5079.3	4754.34	3136.82	0.941148	0.891625	0.965893	0.993409	0.929853	0.613499
FGSG_02507	probable relatd to E3-like factor in the SUMO pathway	4157	4709.09	4115.6	4295.5	4843	4052.24	3888.11	1.13281	0.990041	1.03332	1.16502	0.974799	0.935316
FGSG_02508	conserved hypothetical protein	1200	1460.29	1224.84	1360.38	1392.56	1328.74	977.16	1.21691	1.0207	1.13365	1.16047	1.10728	0.8143
FGSG_02510	related to condensin complex component cnd3	4600	3289.19	4804.3	4519.02	3510.08	5340.55	3803.56	0.715041	1.04441	0.982396	0.763061	1.16099	0.826861
FGSG_02511	related to nucleolar protein NOP4 (NOP77)	3644	4059.73	4066.96	3811.9	4095.1	4038.76	3535.41	1.11409	1.11607	1.04608	1.12379	1.10833	0.9702
FGSG_02512	conserved hypothetical protein	3447	3528.53	2958.19	4090.28	3589.23	3538.8	2941.14	1.02365	0.858193	1.18662	1.04126	1.02663	0.853246
FGSG_02513	conserved hypothetical protein	6645	5761.38	5815.78	6929.9	5805.4	6525.09	4628.53	0.867025	0.875211	1.04287	0.873649	0.981955	0.696543
FGSG_02514	hypothetical protein	86	85.84	65.22	102.61	95.21	66.03	55.56	0.99814	0.758372	1.19314	1.10709	0.767791	0.646047
FGSG_02515	conserved hypothetical protein	2864	2973.1	2931.66	3218.58	3017.98	3018.63	2207.97	1.03809	1.02362	1.12381	1.05376	1.05399	0.770939
FGSG_02516	related to helix-loop-helix protein	1394	1350.21	1367.44	1584.91	1321.44	1265.4	1585.92	0.968587	0.980947	1.13695	0.947948	0.907747	1.13768
FGSG_02517	hypothetical protein	211	168.65	177.98	211.32	199.59	194.05	274.18	0.799289	0.843507	1.00152	0.945924	0.919668	1.29943
FGSG_02518	probable POB3 protein, that binds to DNA polymerase I	8707	9055.62	8789.45	9032.95	9018.39	8851.05	6476.56	1.04004	1.00947	1.03744	1.03576	1.01654	0.743834
FGSG_02519	related to starvation induced protein PSI-7	7403	6702.6	6554.23	7033.53	6693.25	7469.76	5999.45	0.90539	0.885348	0.950092	0.904127	1.00902	0.810408
FGSG_02520	conserved hypothetical protein	12195	9854.44	9831.89	12891.6	9855.76	12748.3	7067.2	0.808072	0.806223	1.05712	0.80818	1.04537	0.579516
FGSG_02521	conserved hypothetical protein	6165	9171.76	8088.59	6995.94	8406.99	5606.02	9718.46	1.48771	1.31202	1.13478	1.36366	0.90933	1.57639
FGSG_02522	related to SUR2 protein	10592	9525.22	9405.19	10250.1	9681.41	9123.26	11096.6	0.899284	0.887952	0.967719	0.91403	0.861335	1.04764
FGSG_02523	probable IgE-dependent histamine-releasing factor	17770	16941.8	16858.2	16601.9	16443.5	17114.5	13524.4	0.953393	0.948686	0.934265	0.925351	0.963114	0.761082
FGSG_02524	conserved hypothetical protein	1724	1785.47	1824	1715.97	1814.69	1702.02	1927.75	1.03566	1.058	0.995342	1.0526	0.987251	1.11818
FGSG_02525	conserved hypothetical protein	704	792.76	693.12	730.48	886.7	698.06	570.11	1.12608	0.984545	1.03761	1.25952	0.991562	0.809815
FGSG_02527	probable ITC1 - subunit of Isw2 chromatin remodelling complex	7471	7231.77	6233.64	7582.15	7273.67	7192.15	5214.34	0.967979	0.834378	1.01488	0.973587	0.962676	0.697944
FGSG_02528	related to glucosyltransferase	1628	2014.72	1702.4	1620.47	1975.28	1583.43	1791.26	1.23754	1.0457	0.995375	1.21332	0.972623	1.10028
FGSG_02529	conserved hypothetical protein	2391	2284.36	2821.11	2278.81	2365.29	2366.39	2850.55	0.955399	1.17989	0.953078	0.989247	0.989707	1.1922
FGSG_02530	probable prolidase	3391	4029.43	4735.76	3350.65	4030.86	4048.2	5534.42	1.18827	1.39657	0.988101	1.18869	1.19381	1.63209
FGSG_02531	related to transcriptional activator Mut3p	8951	7531.71	10049.7	8808.42	7967.66	9402.22	11053.1	0.841438	1.12274	0.984071	0.890142	1.05041	1.23485
FGSG_02532	related to COP9 signalosome complex subunit 1 (G protein pathway suppressor 1)	6339	6674.32	6362.98	6029.76	6659.98	6079.03	5813.44	1.0529	1.00378	0.951216	1.05064	0.958989	0.917091
FGSG_02533	related to potassium channel regulatory factor	1058	1240.14	1209.36	1133.82	1383.39	1172.41	1130.56	1.17216	1.14306	1.07166	1.30755	1.10814	1.06858
FGSG_02534	conserved hypothetical protein	844	1081.59	839.04	951.96	1096.61	847.64	806.85	1.2815	0.994123	1.12791	1.2993	1.00431	0.955983
FGSG_02536	probable splicing factor PRP8 (U5 snRNP)	14505	9737.29	12225.2	13180.1	9698.61	12791.4	11765.8	0.671306	0.842827	0.90866	0.668639	0.881864	0.811153
FGSG_02537	hypothetical protein	145	145.42	155.87	151.38	136.5	132.06	271.77	1.0029	1.07497	1.044	0.941379	0.910759	1.87428
FGSG_02538	conserved hypothetical protein	259	542.31	355.96	357.62	515.04	274.91	571.32	2.09386	1.37436	1.38077	1.98857	1.06143	2.20587
FGSG_02539	related to 2-dehydropantoate 2-reductase	994	679.65	871.1	932.66	798.37	966.23	960.25	0.683753	0.876358	0.93829	0.803189	0.972062	0.966046
FGSG_02540	related to DNA repair helicase ERCC6	8493	7661.98	6880.33	8731.21	7570.77	8743.24	5512.68	0.902152	0.810118	1.02805	0.891413	1.02946	0.649085
FGSG_02541	probable 40S ribosomal protein S14	11431	8061.9	10646.6	8304.5	8485	10204	6663.77	0.705266	0.93138	0.726489	0.74228	0.892664	0.582956
FGSG_02542	probable 60s ribosomal protein L7 subunit	23226	15648.1	22067	17055	16184.2	19937.8	13078.7	0.673734	0.950101	0.734307	0.696816	0.858425	0.563107
FGSG_02543	related to iron transport protein	1624	1714.78	1649.33	1723.08	1510.71	1633.29	1252.55	1.0559	1.0156	1.06101	0.93024	1.00572	0.771275
FGSG_02544	related to translation initiation factor eIF3	22355	17627.5	21955.4	18724.2	18096.4	20704.5	17985.1	0.788527	0.982124	0.837587	0.809503	0.926171	0.804521
[truncated: 9,910 more rows]
